# Supplementary material for: New method for in situ generation of enolate-iminium 1,4-dipoles for [4 + 2] and [4 + 1] dipolar heterocycloaddition reactions
Source: Royal Society of Chemistry journal article supplement (doi:10.1039/c6ra21981k), 2016-01-01
Supplement: c6ra21981k1.pdf [file c6ra21981k1.pdf]

# Supporting Information

## New method for in-situ generation of enolate-iminium 1,4-dipoles for [4+2] and [4+1] dipolar heterocycloaddition reactions†

Vladimir E. Zhulanov,<sup>a</sup> Maksim V. Dmitriev,<sup>a</sup> Andrey N. Maslivets,<sup>\*a</sup> and Michael Rubin<sup>\*b,c</sup>

---

<sup>a</sup> Department of Chemistry, Perm State University, ul. Bukireva 15, Perm 614990, Russian Federation. E-mail: [koh2@psu.ru](mailto:koh2@psu.ru)

<sup>b</sup> Department of Chemistry, North Caucasus Federal University, 1a Pushkin St., Stavropol 355009, Russian Federation

<sup>c</sup> Department of Chemistry, University of Kansas, 1251 Wescoe Hall Dr., Lawrence, KS 66045-7582, USA. E-mail: [mrubin@ku.edu](mailto:mrubin@ku.edu);

Fax: +1 (785) 864-5396; Tel: +1 (785) 864-5071

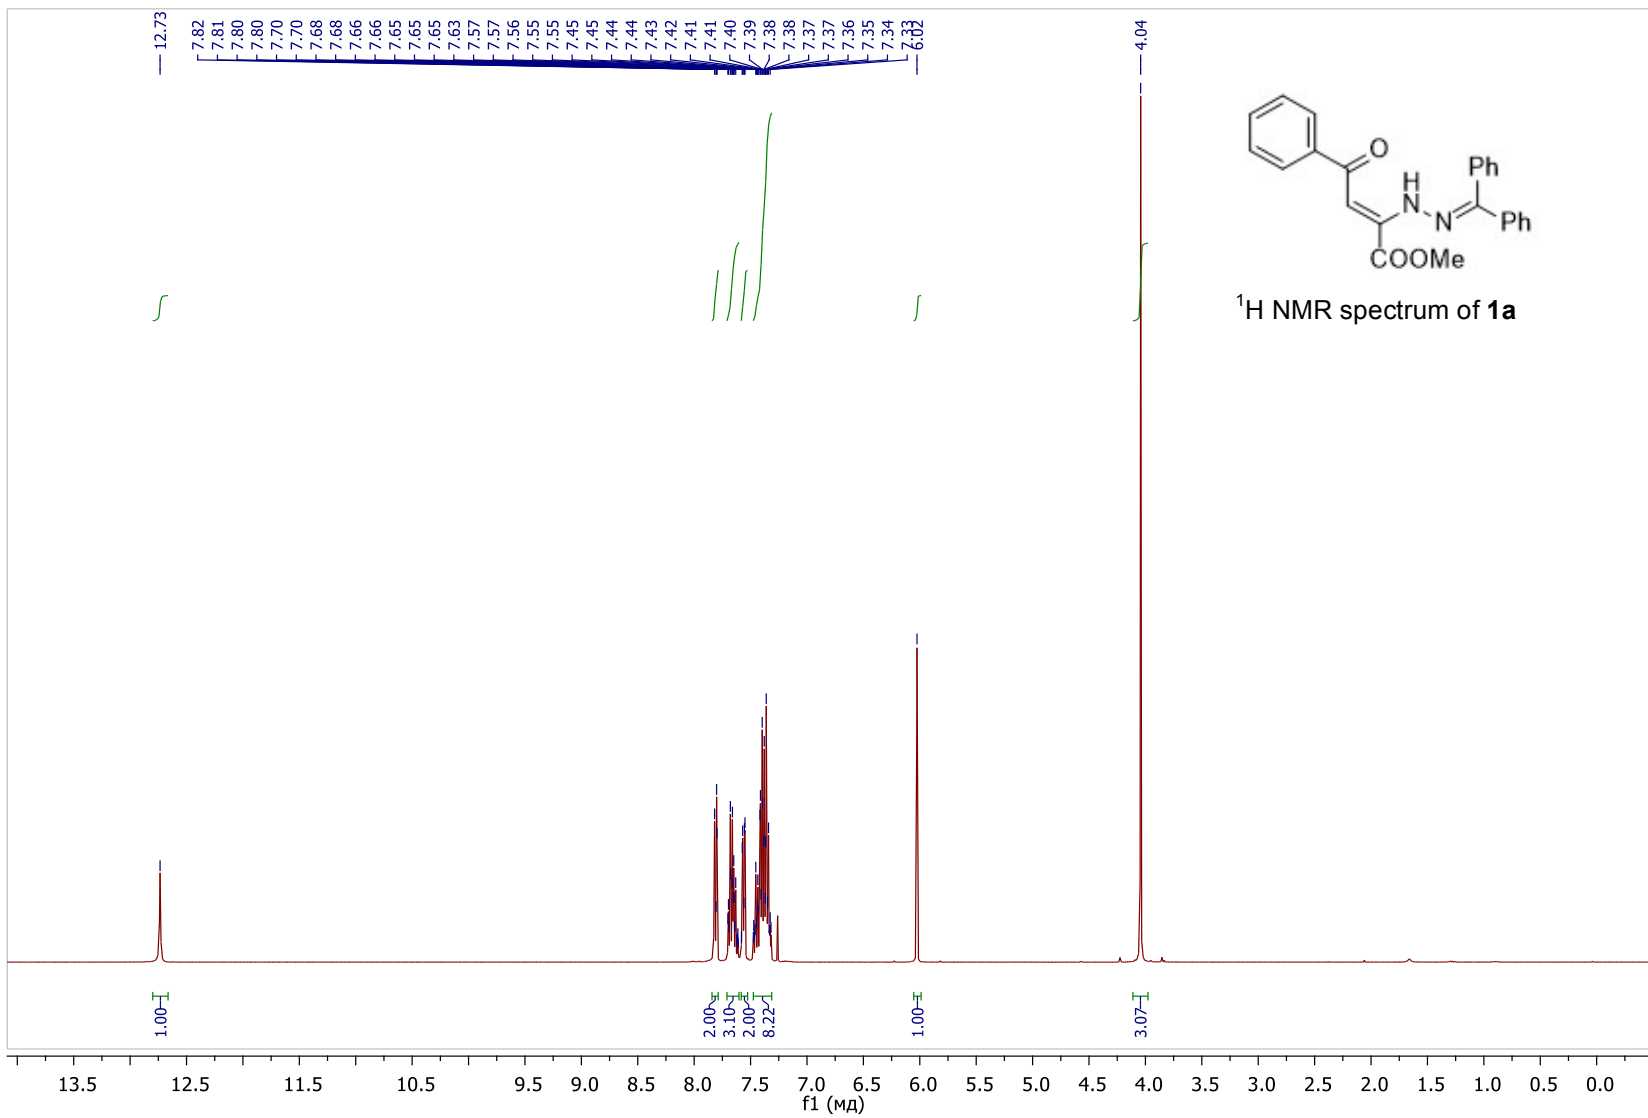

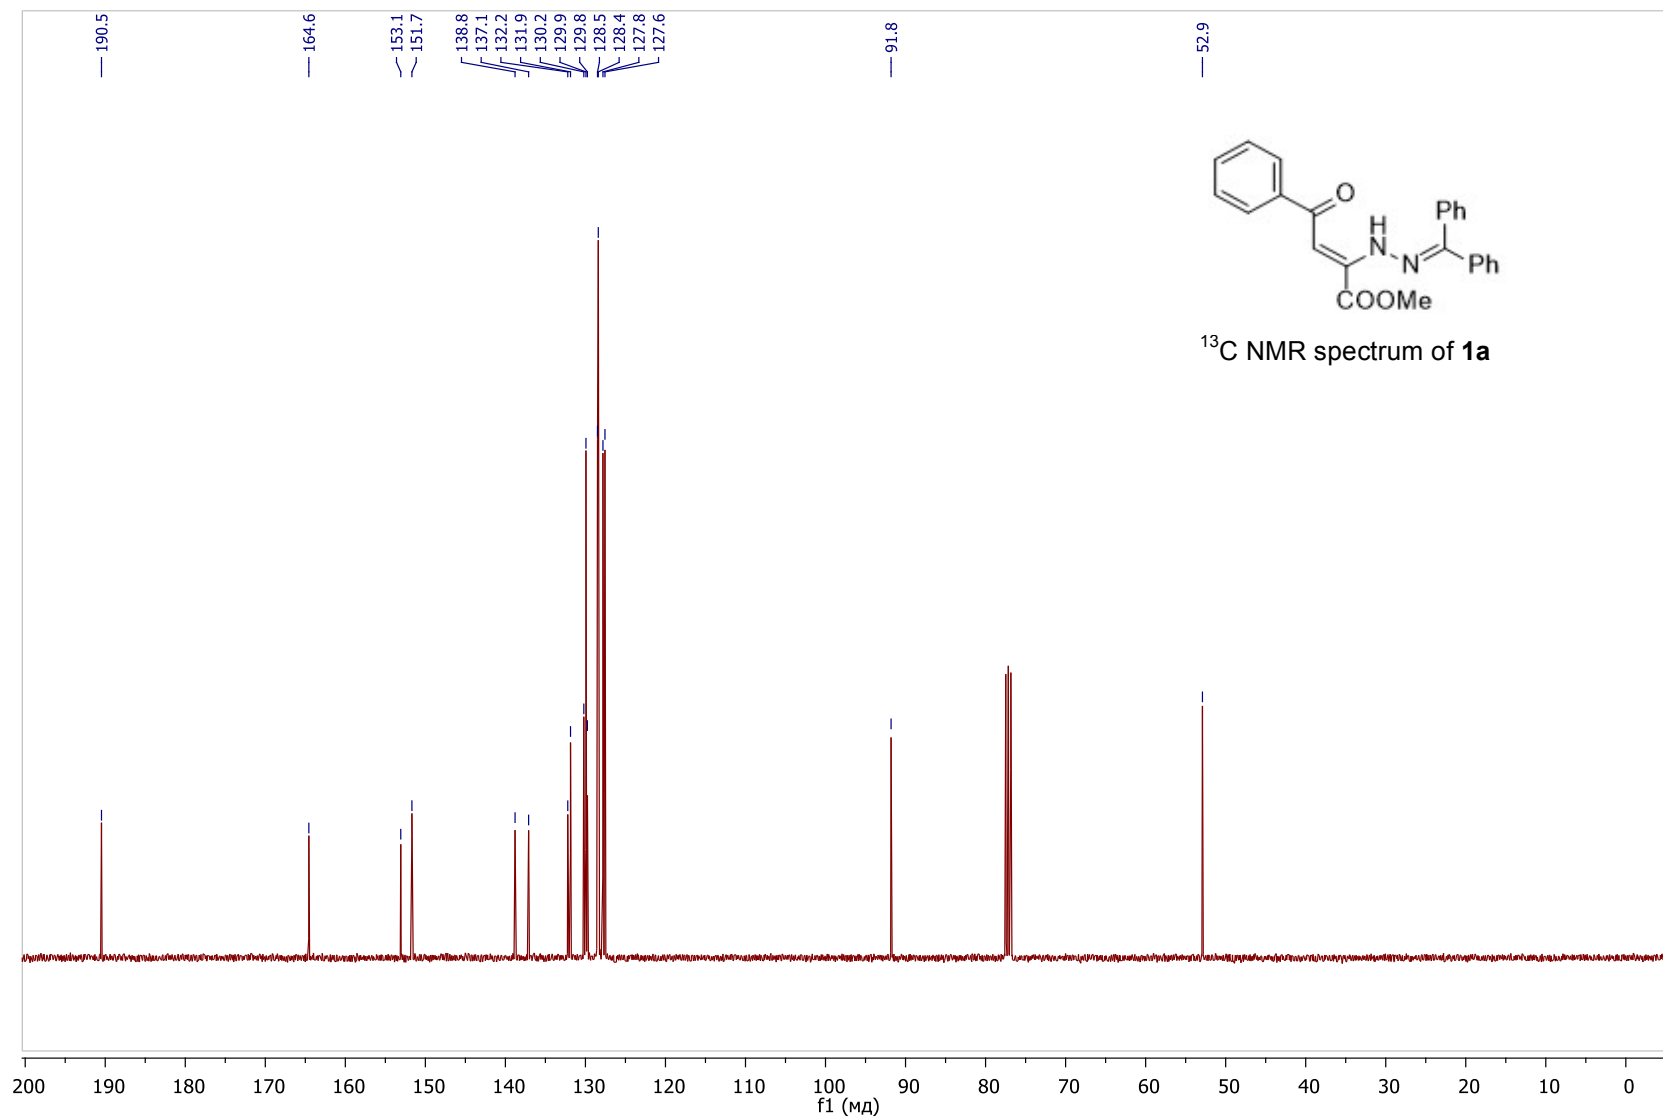

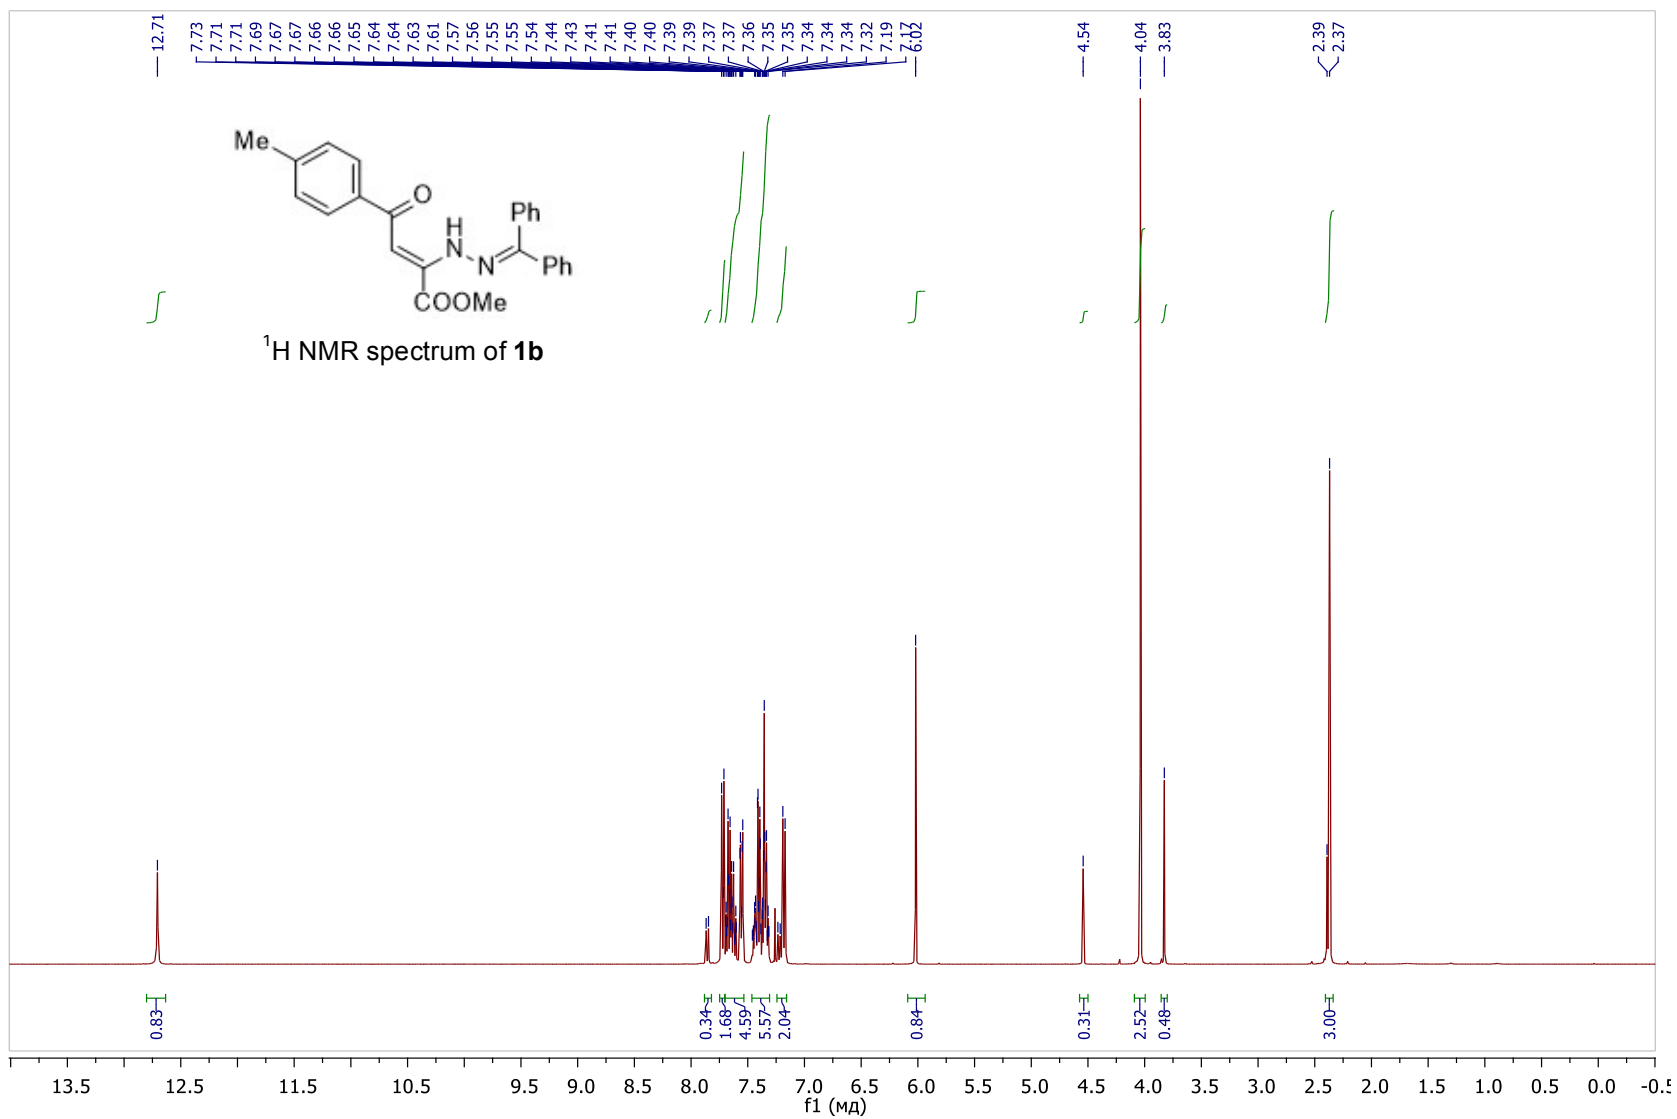

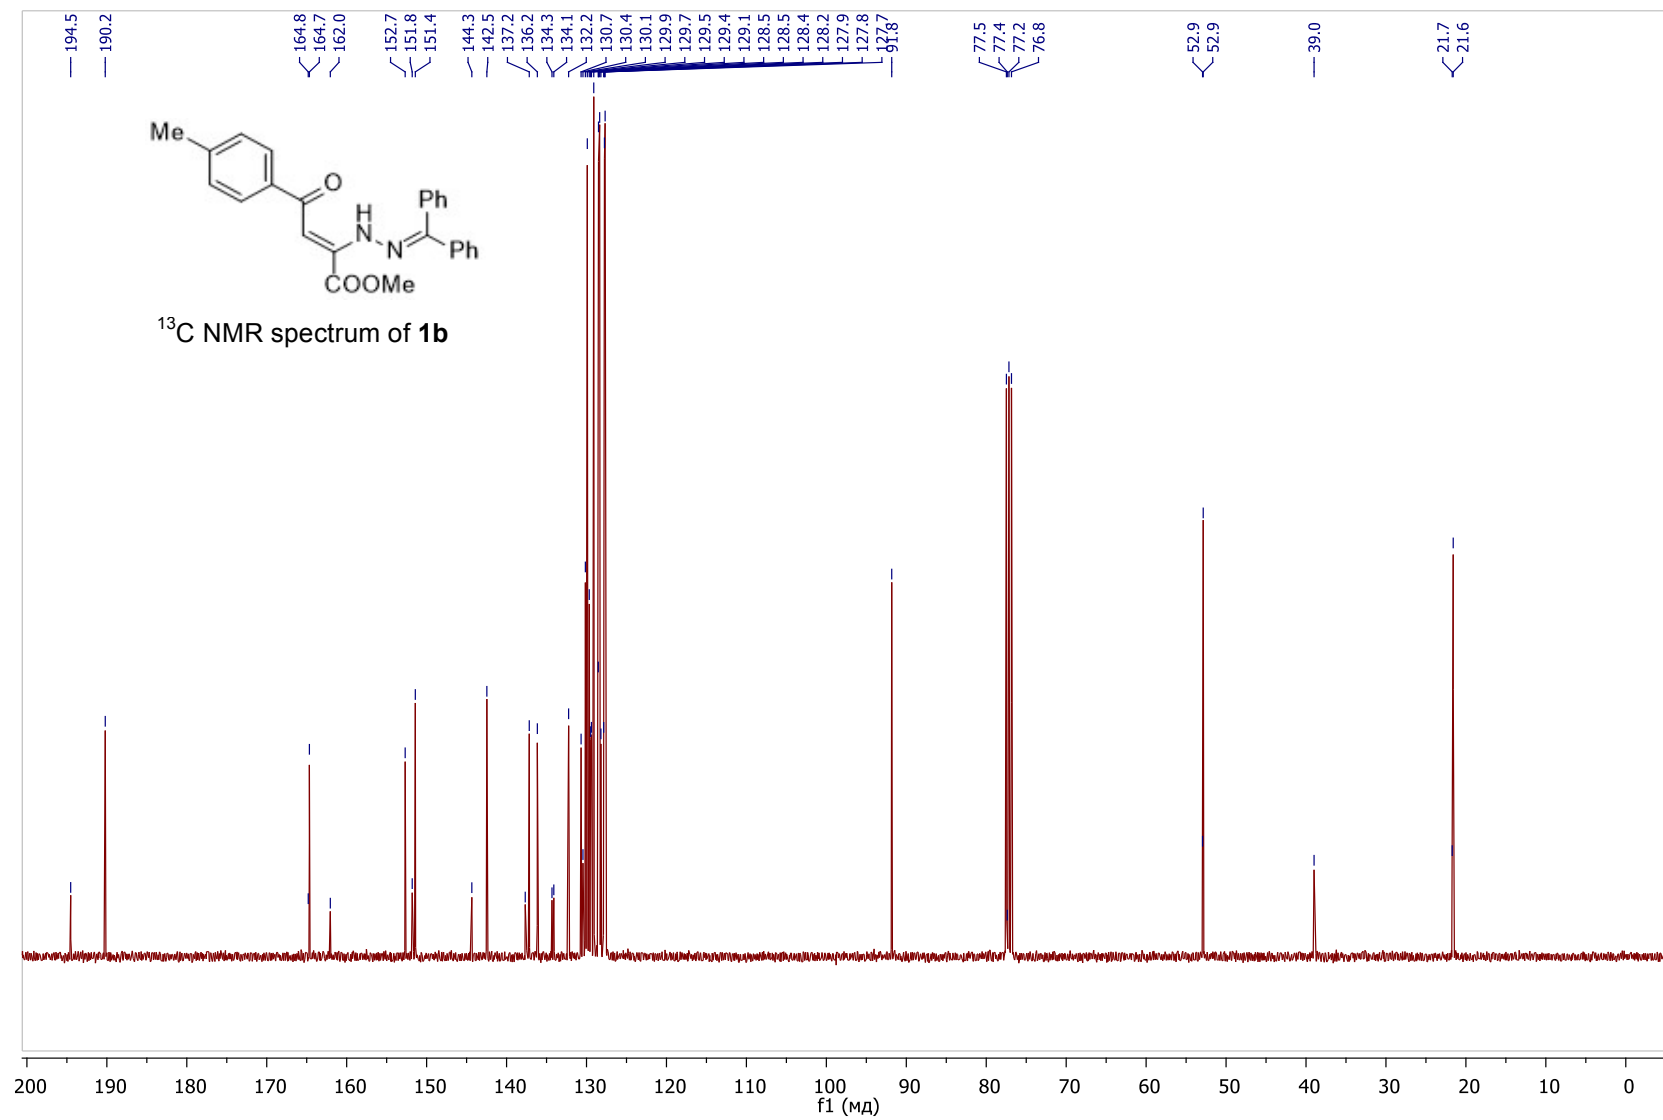

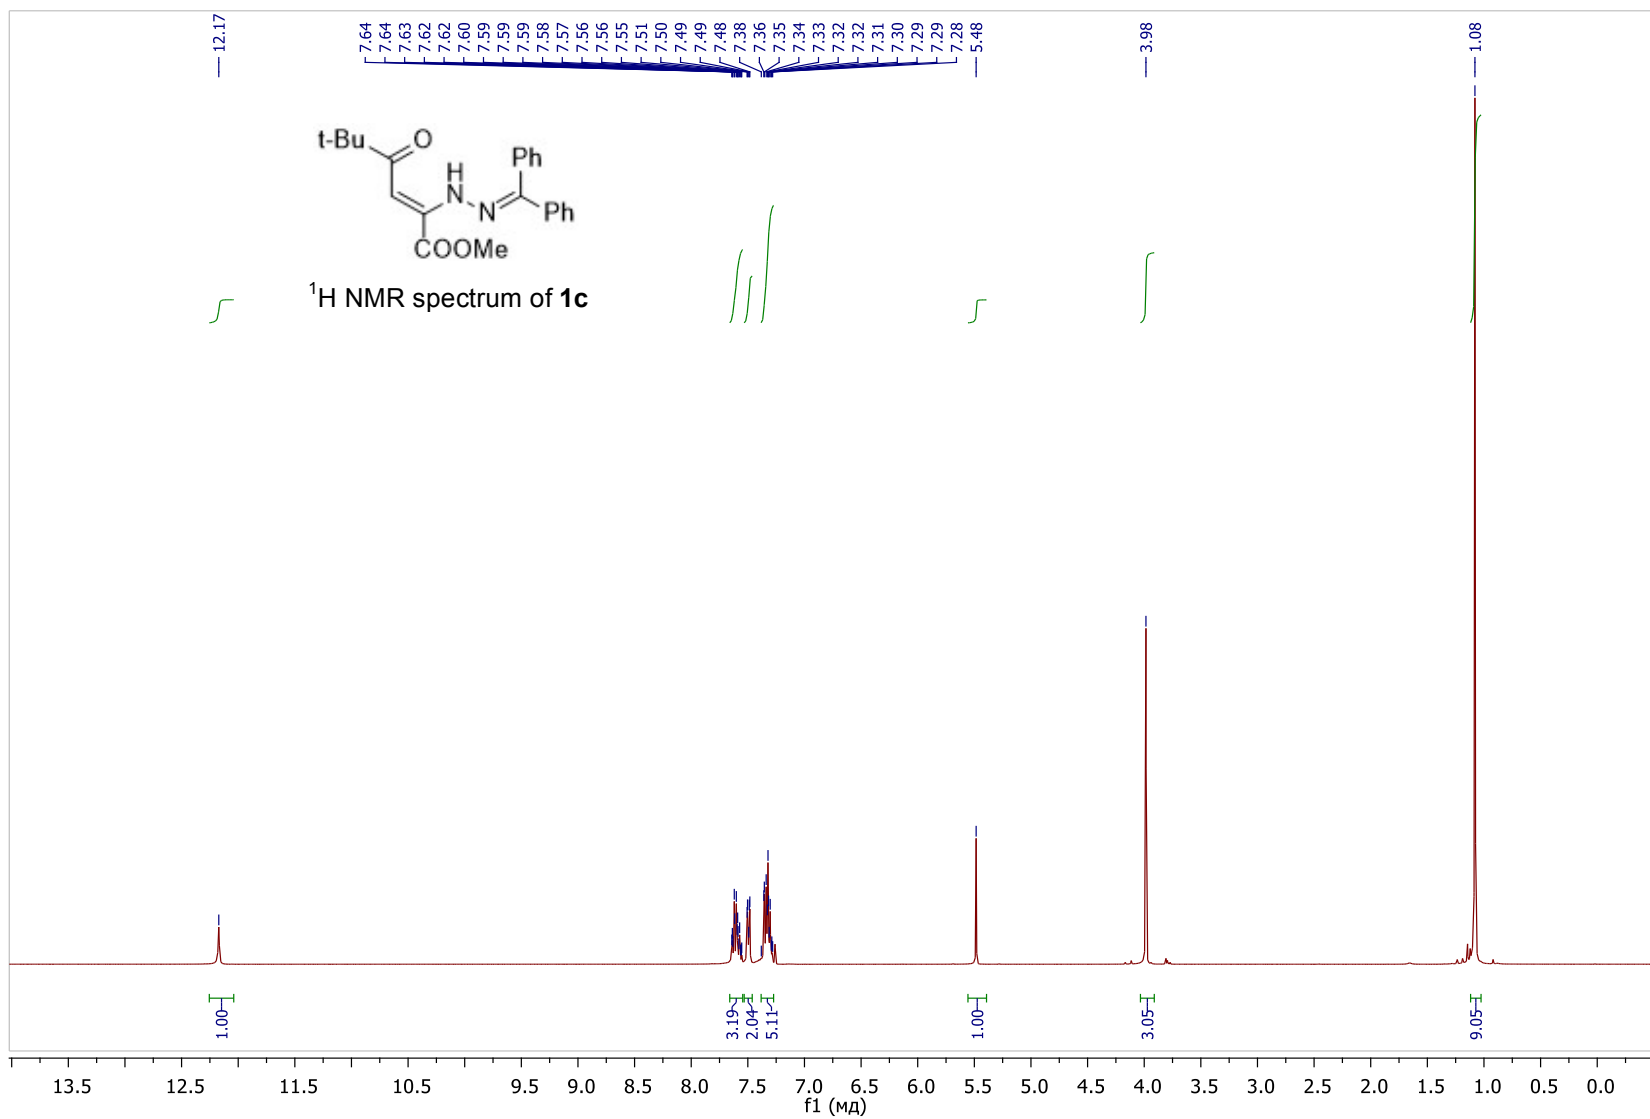

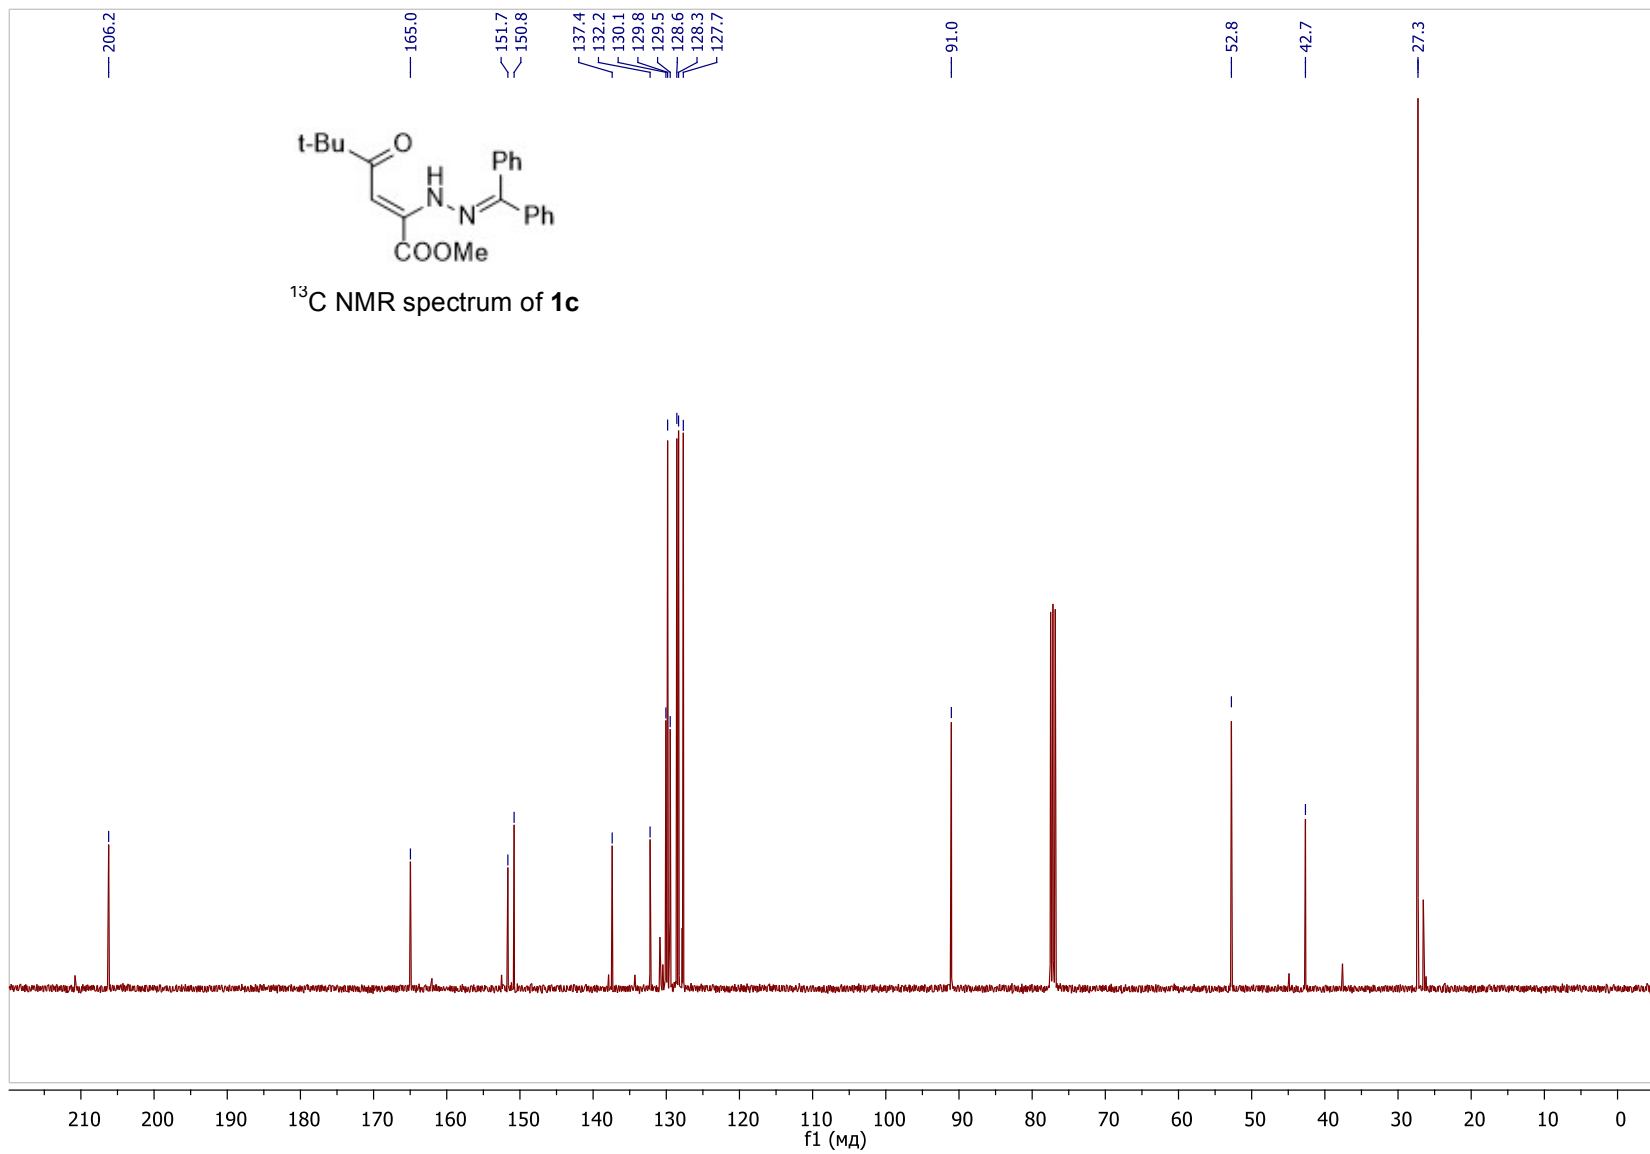

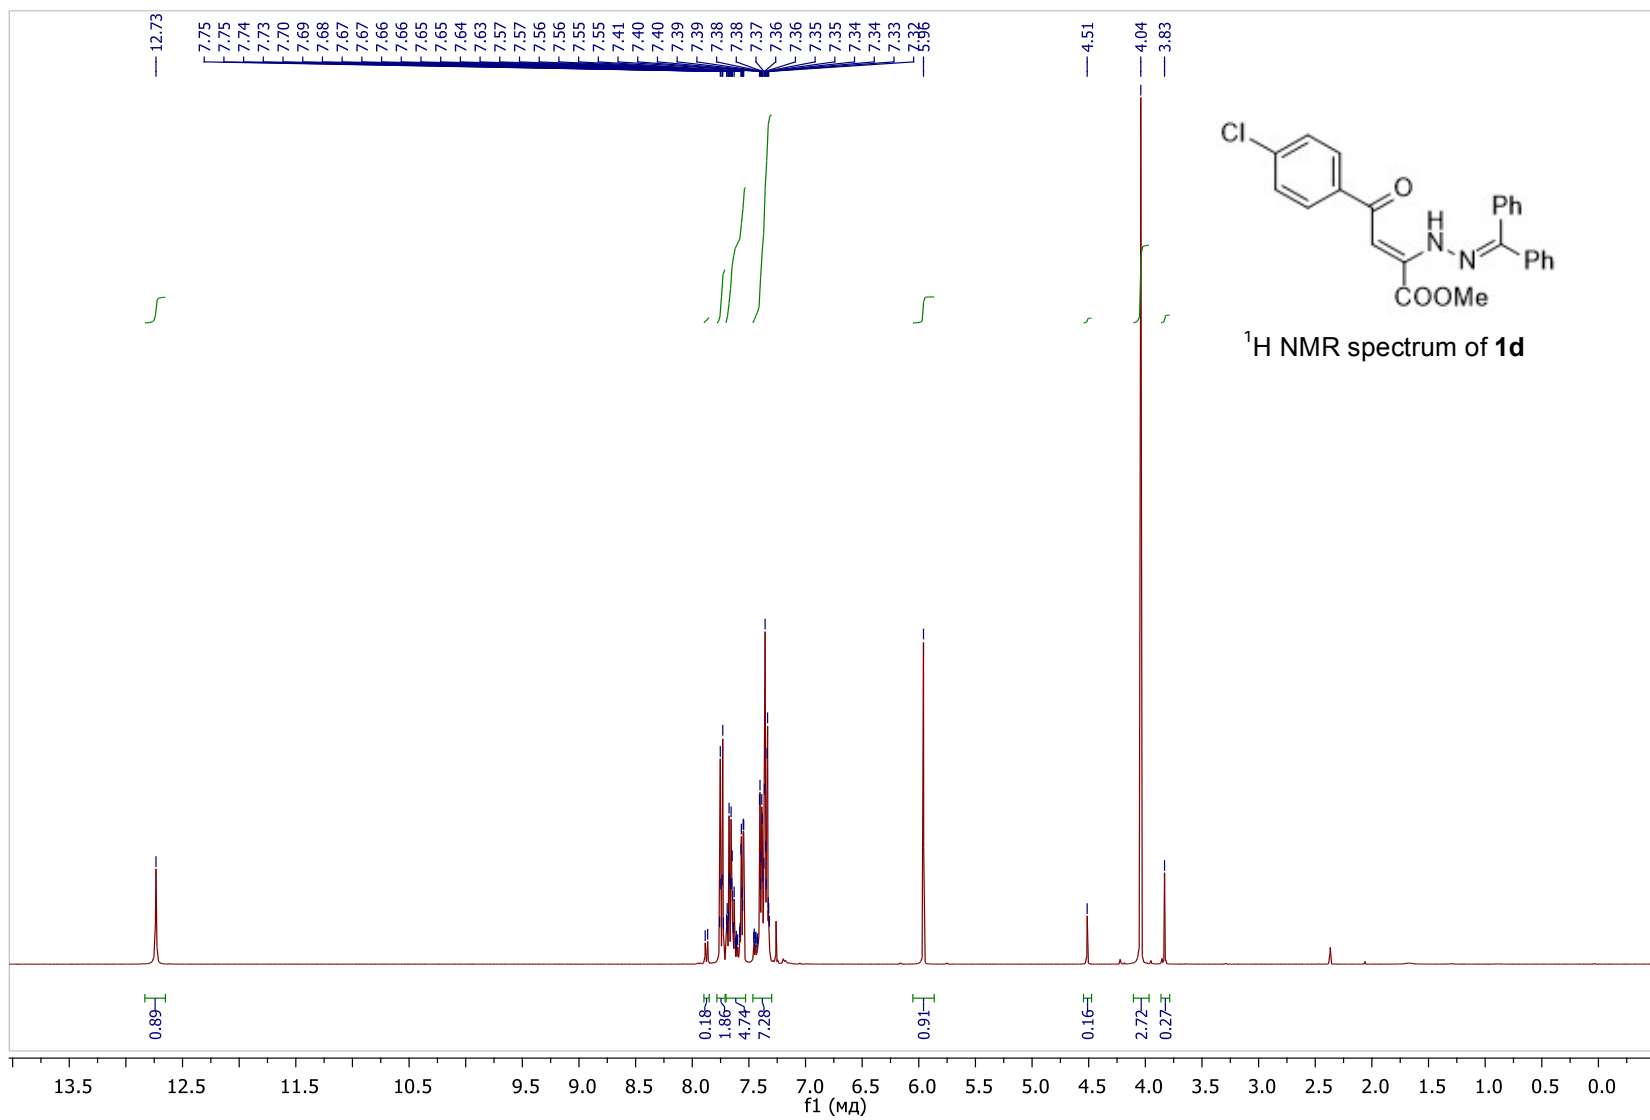



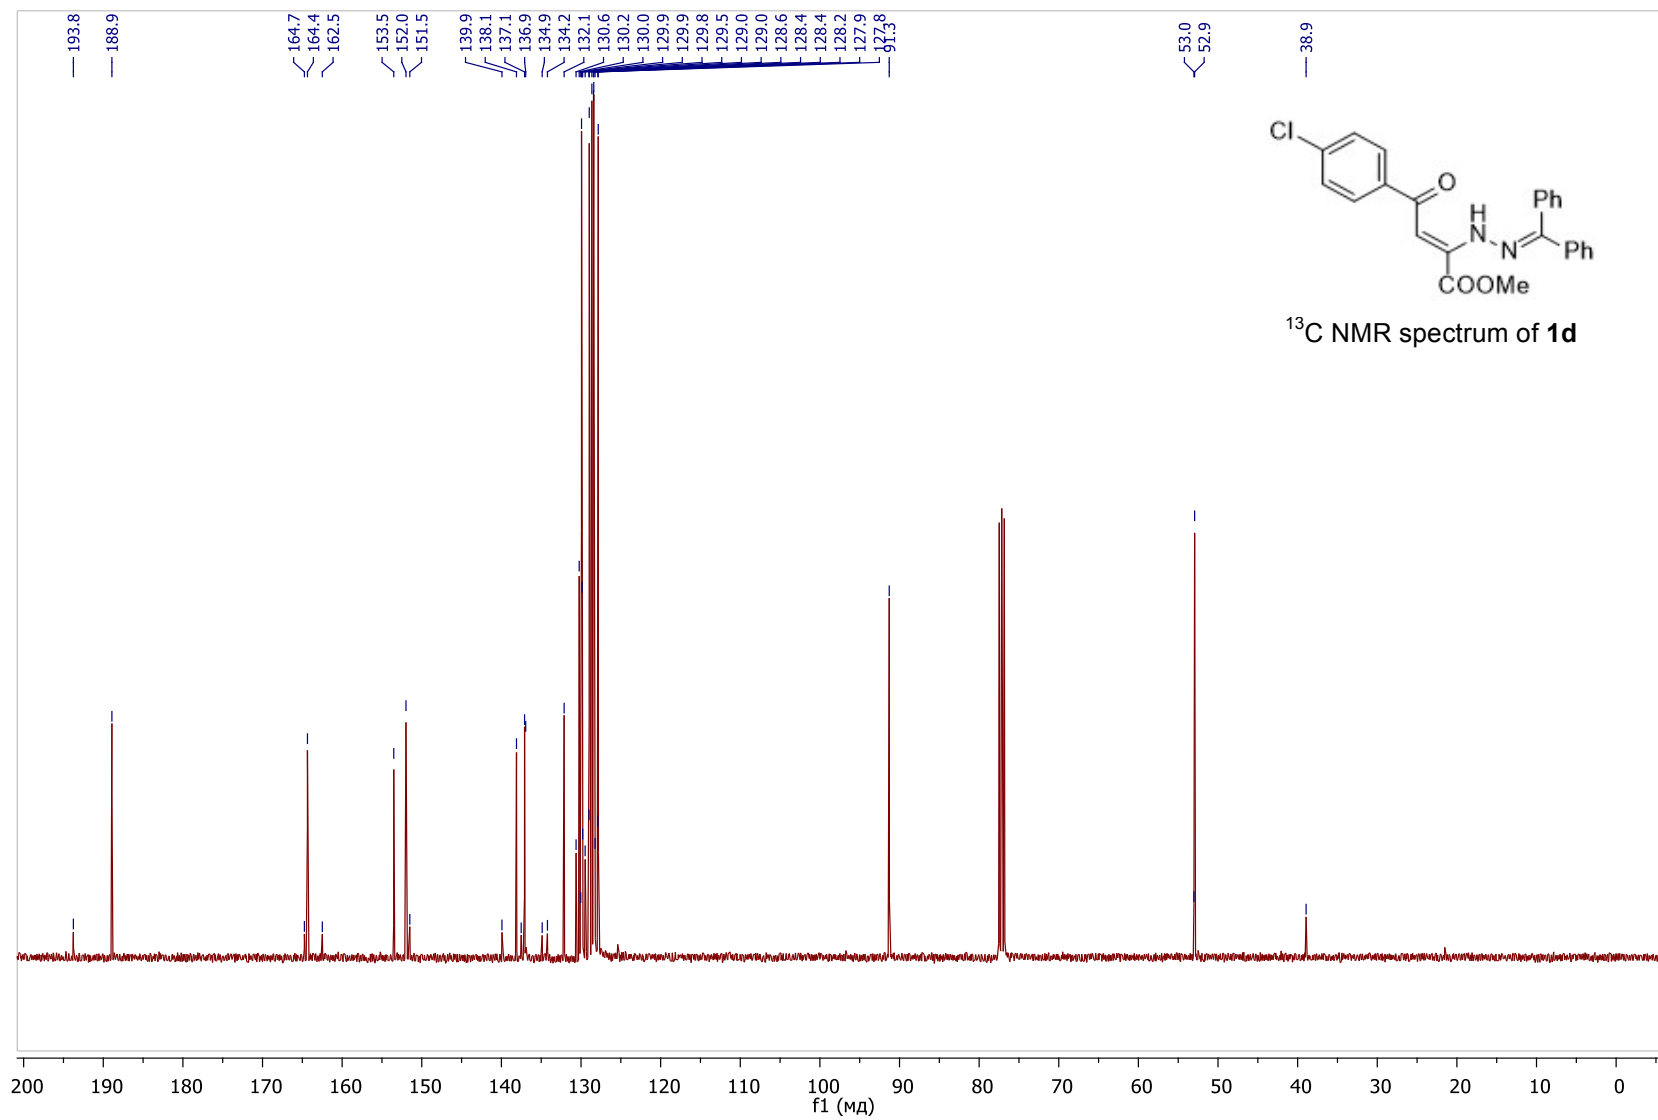

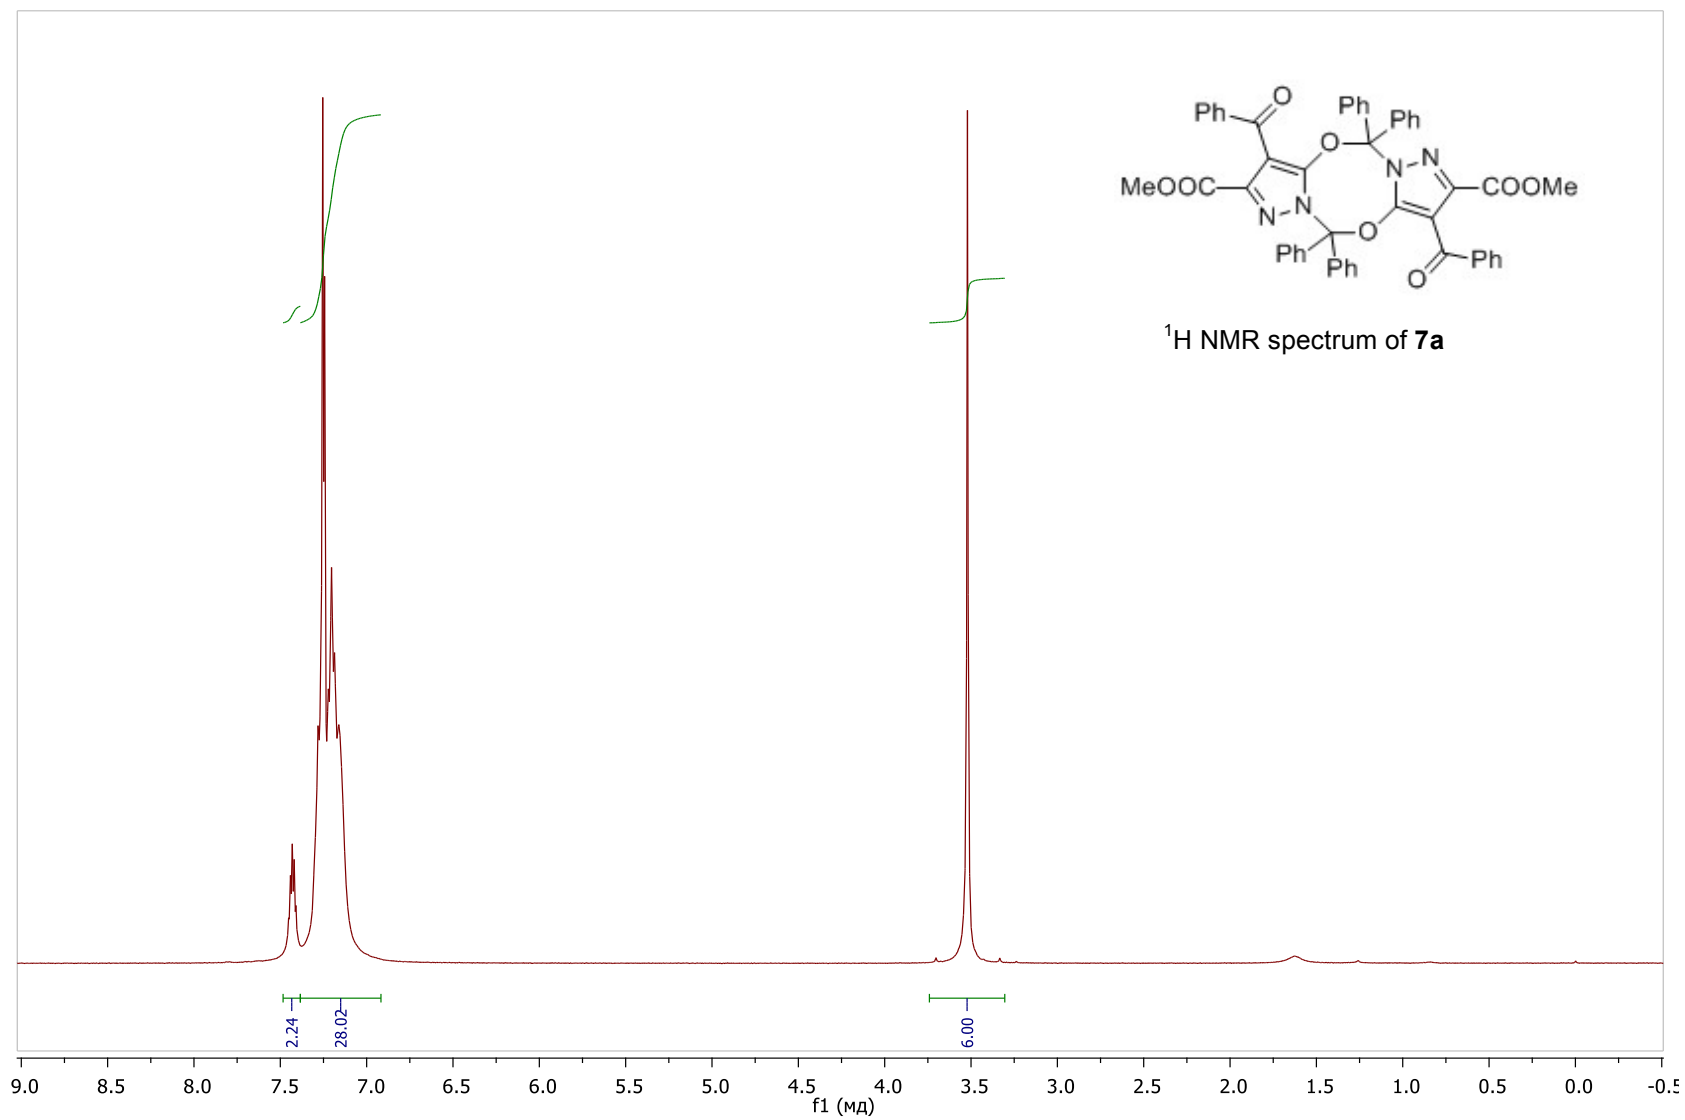

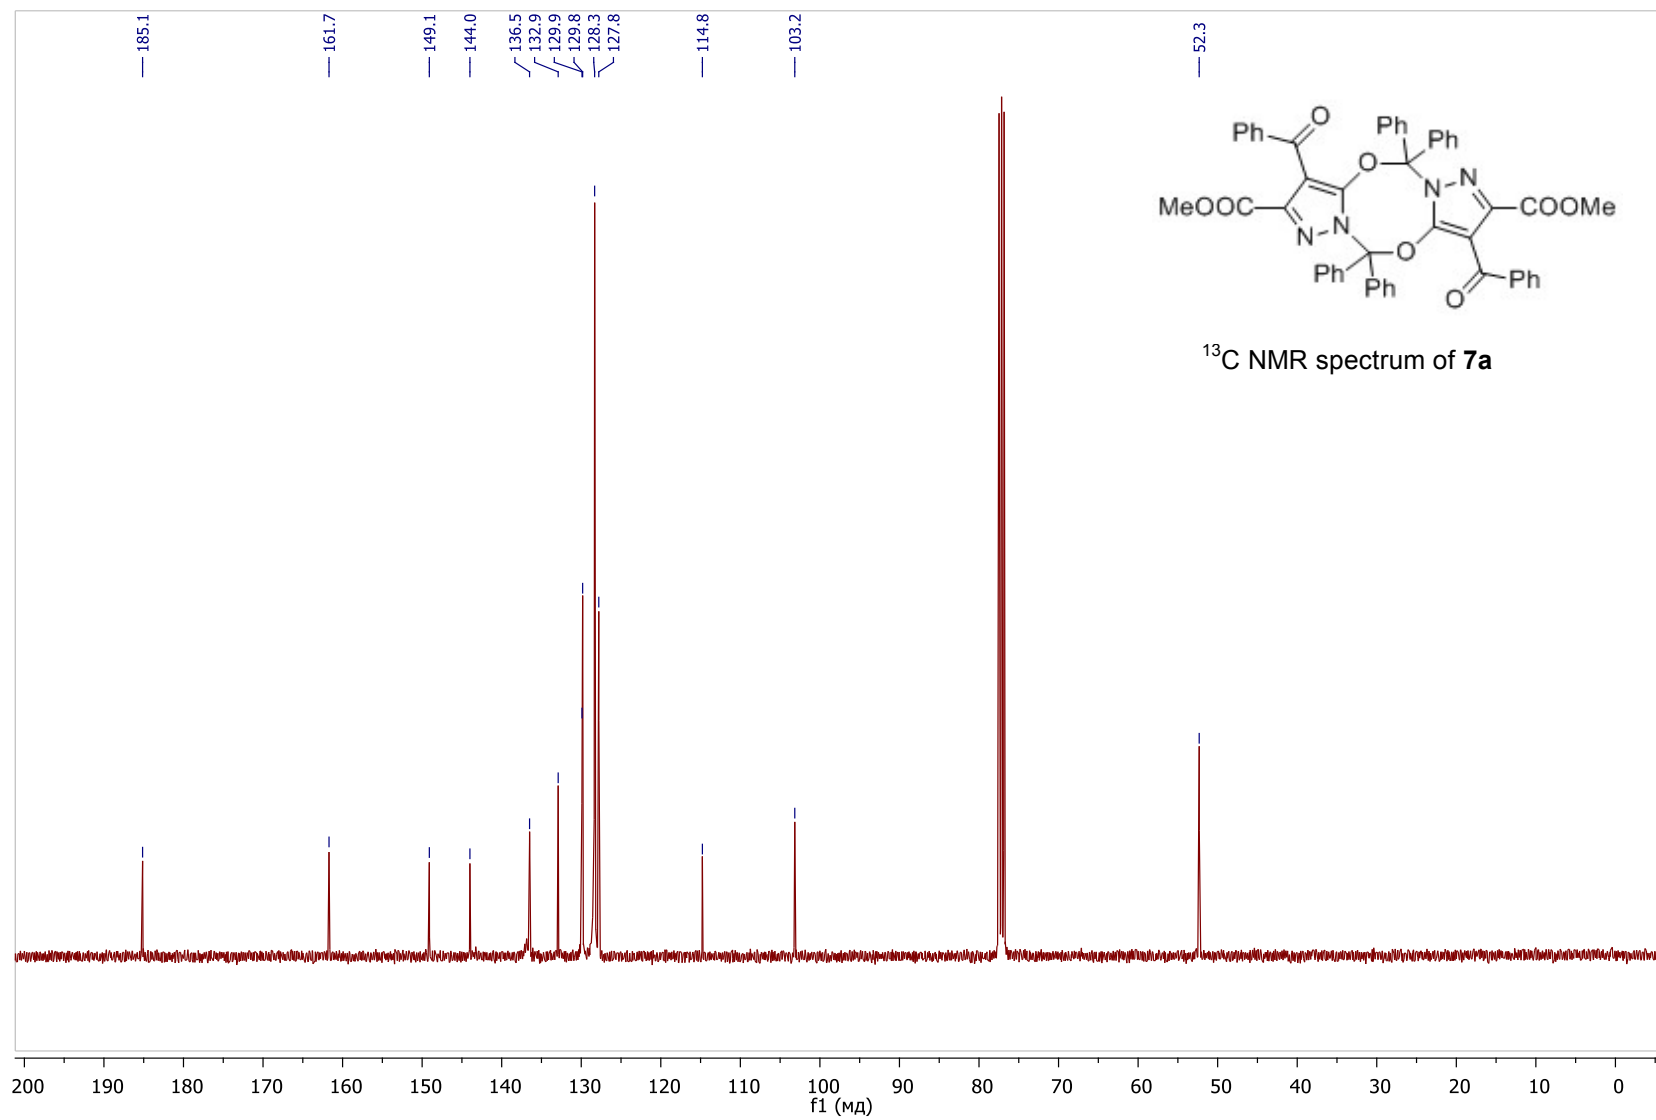

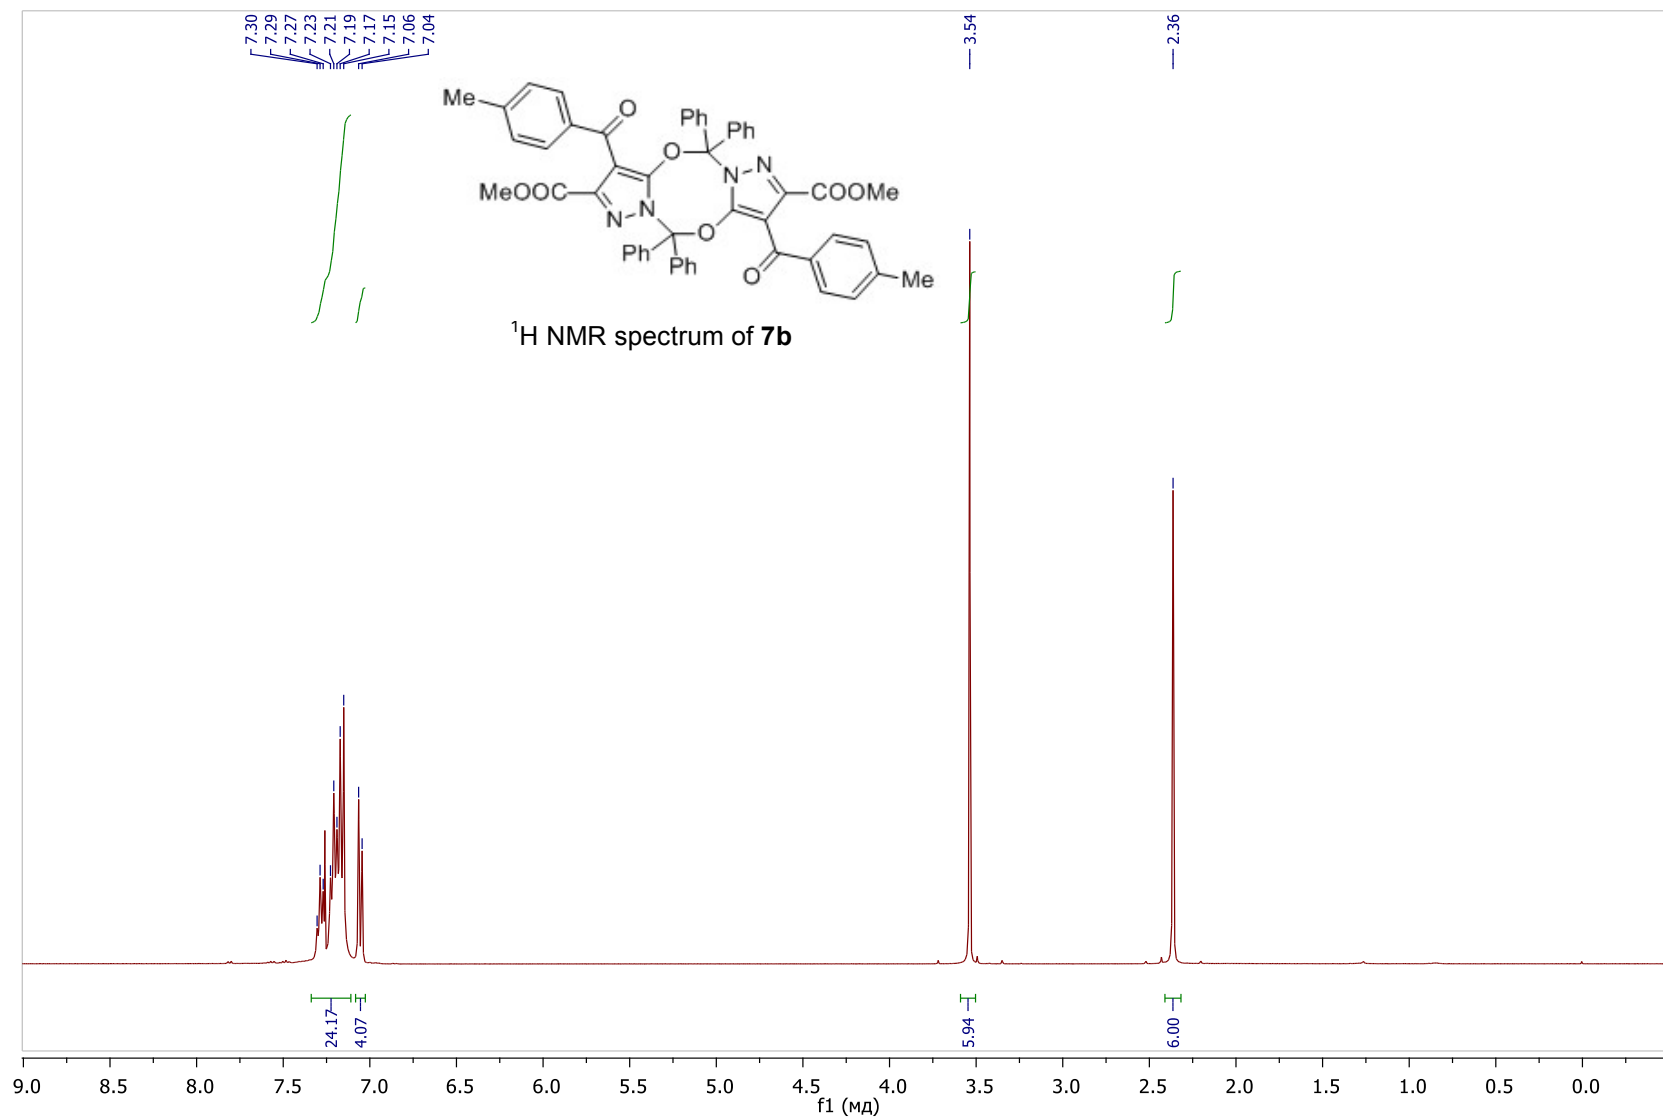

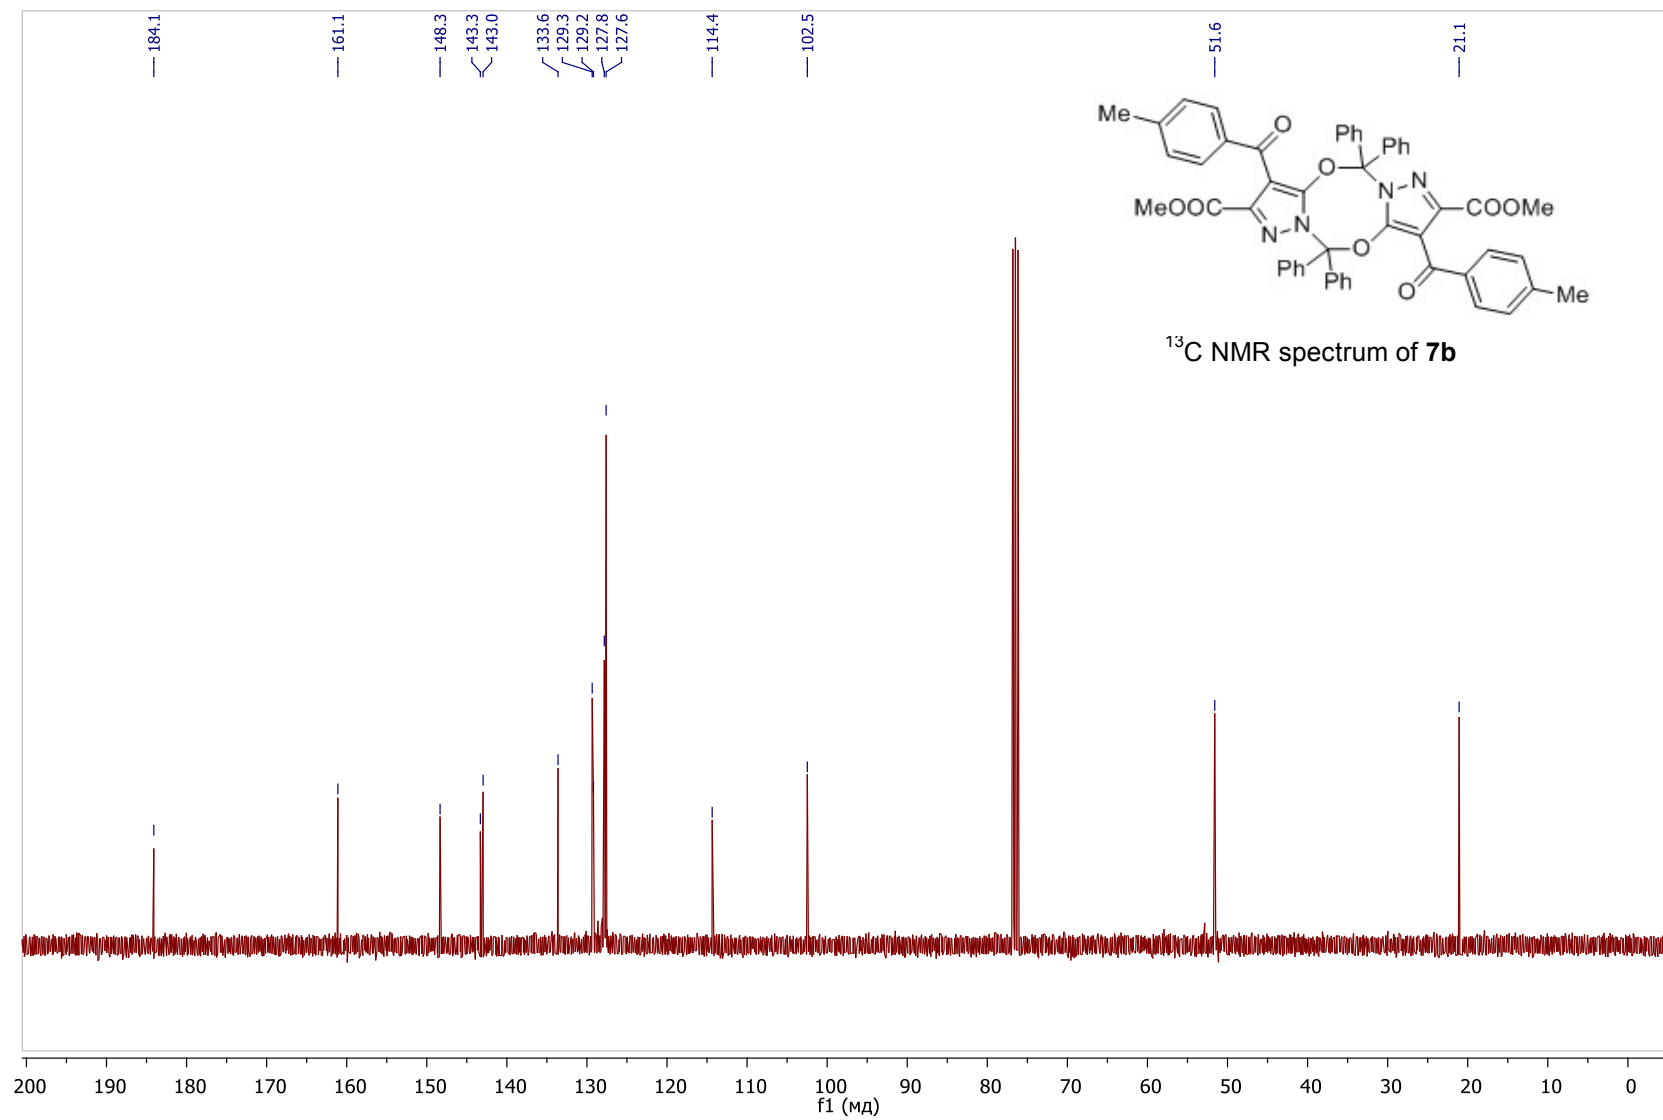

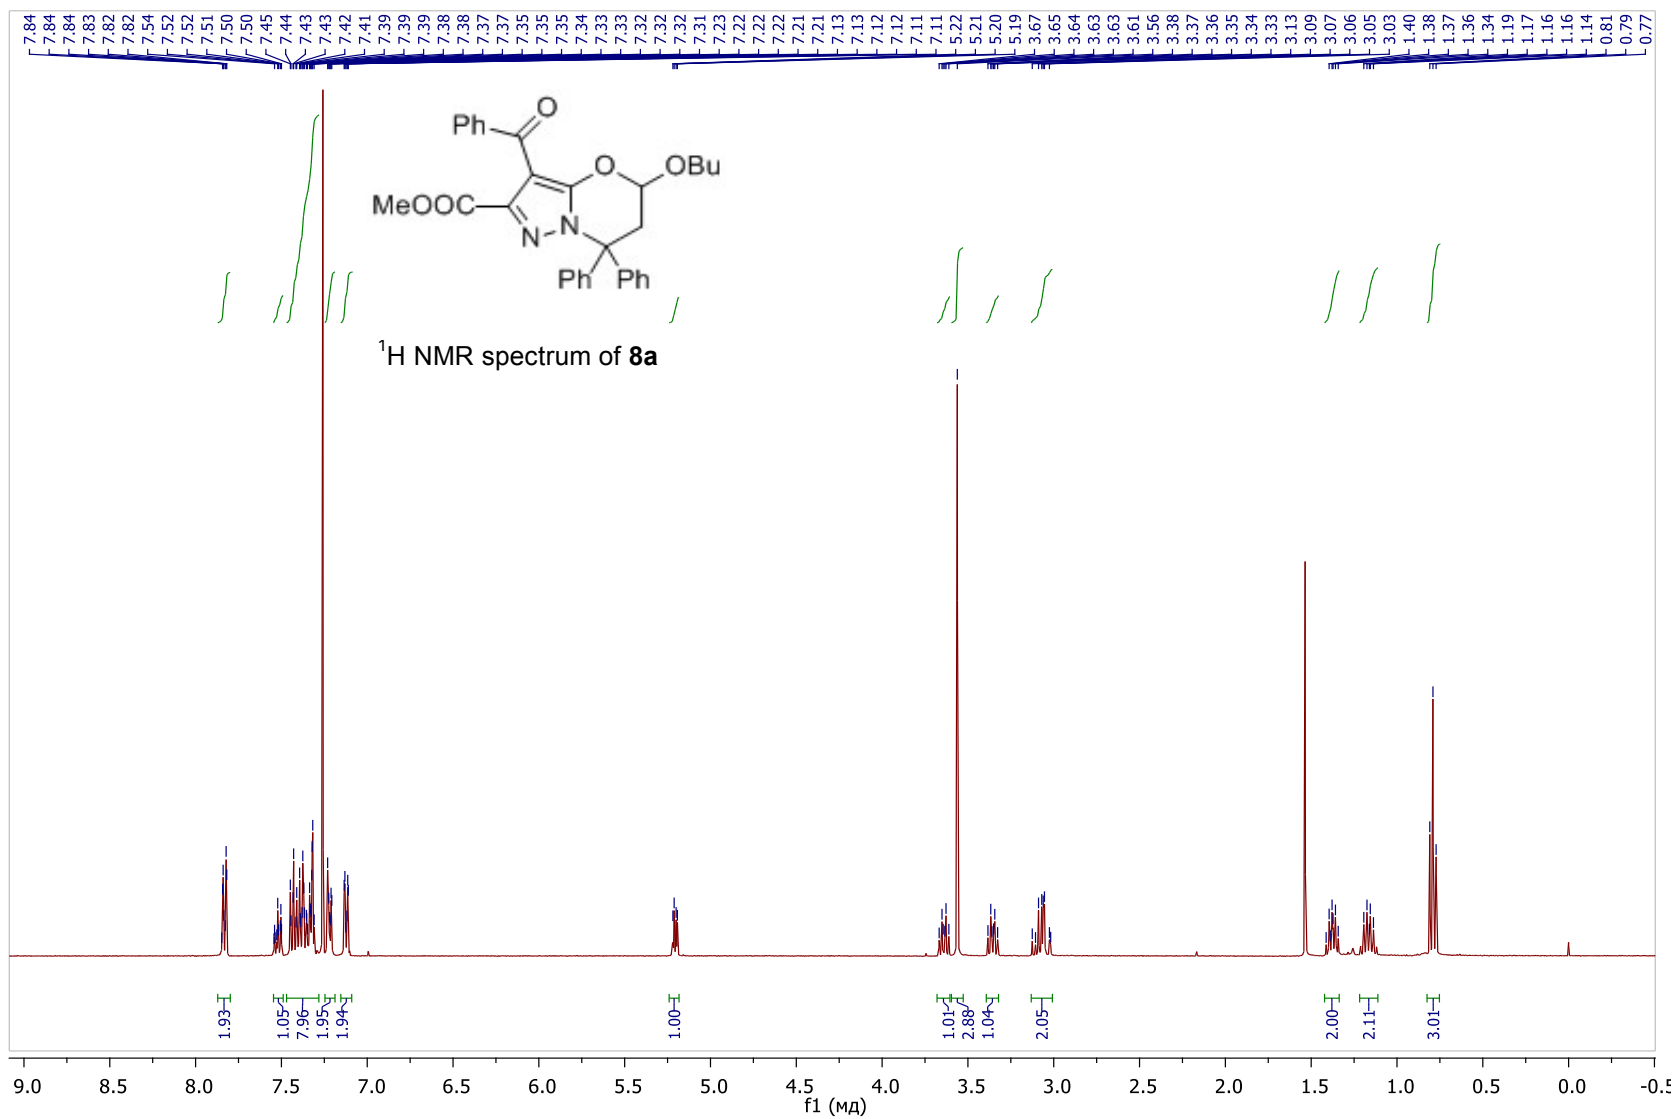

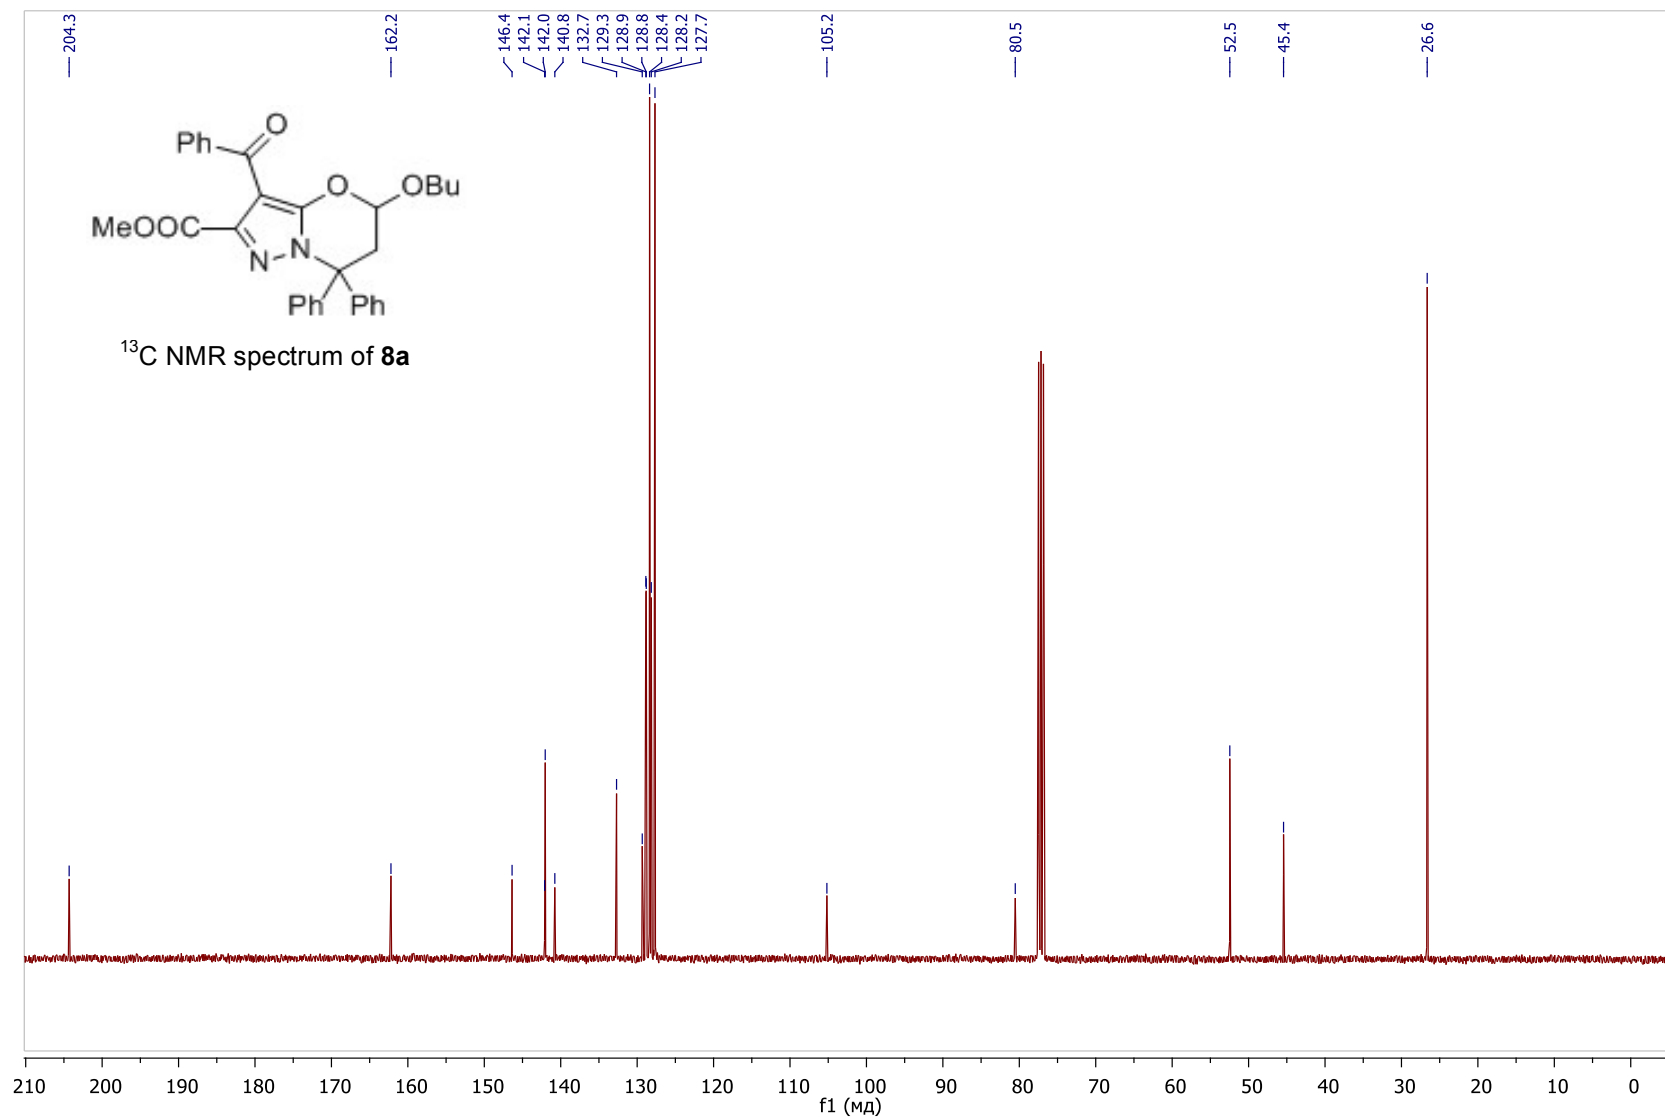

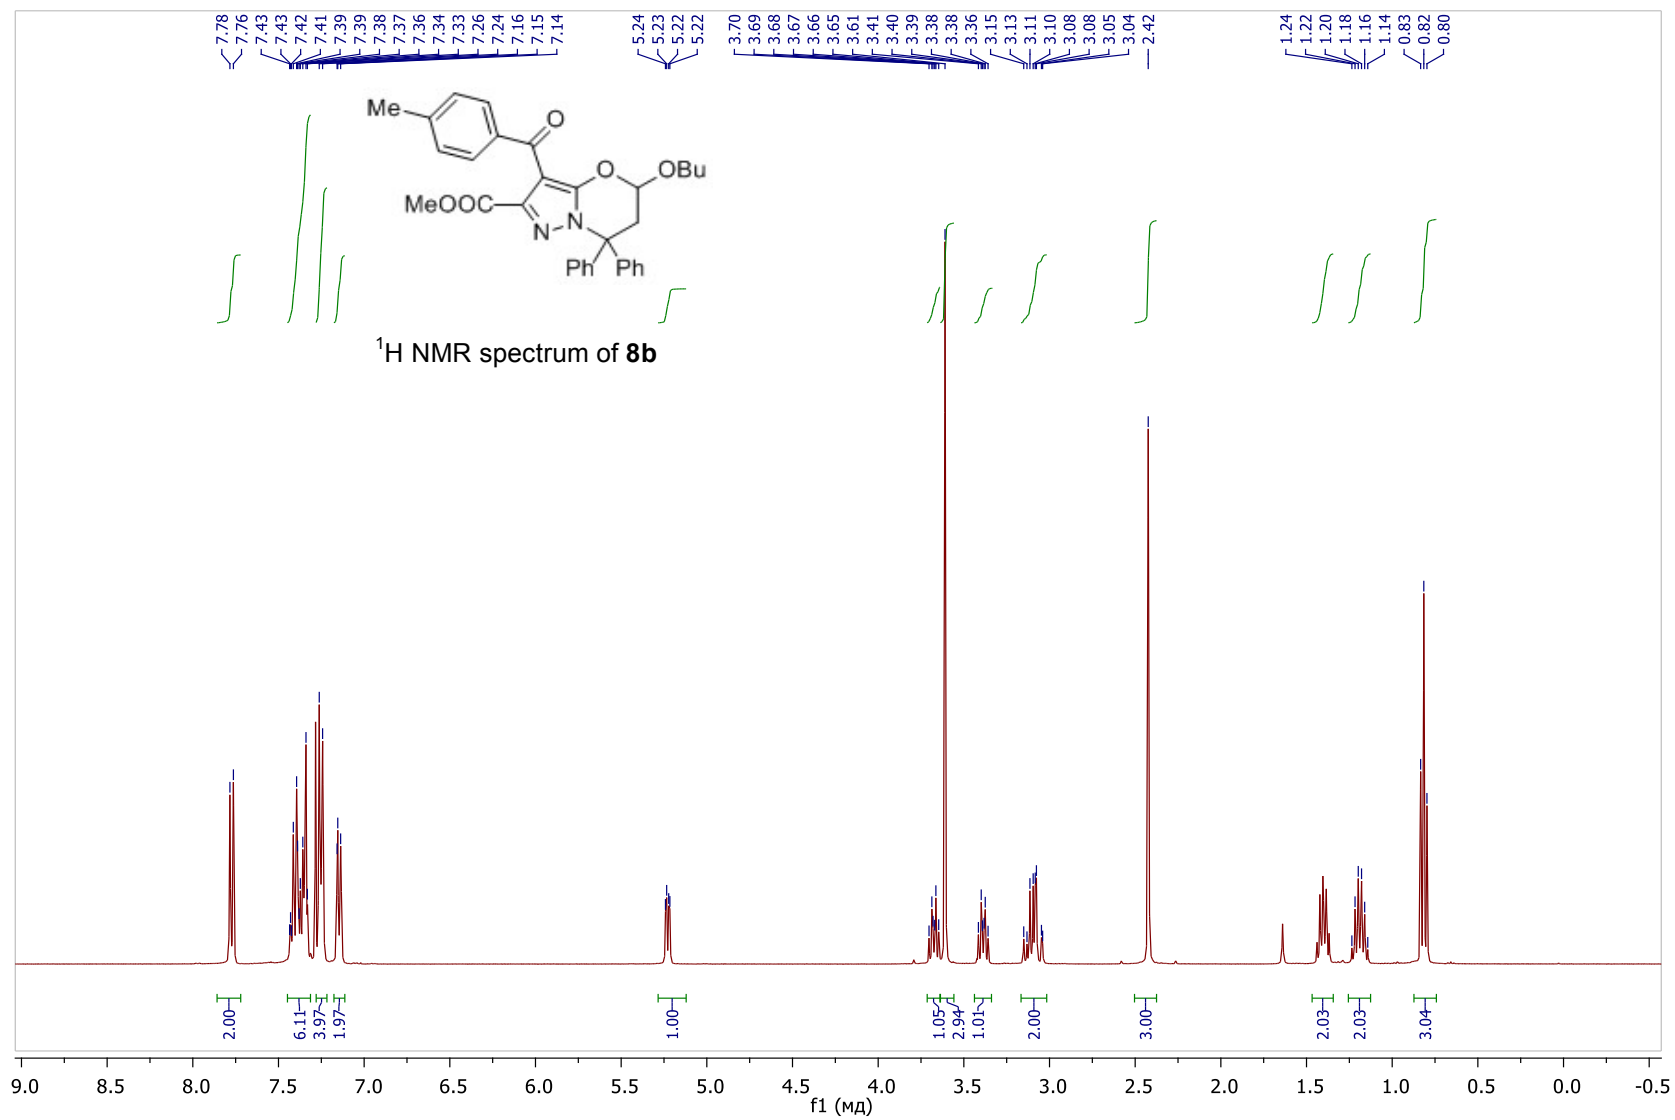



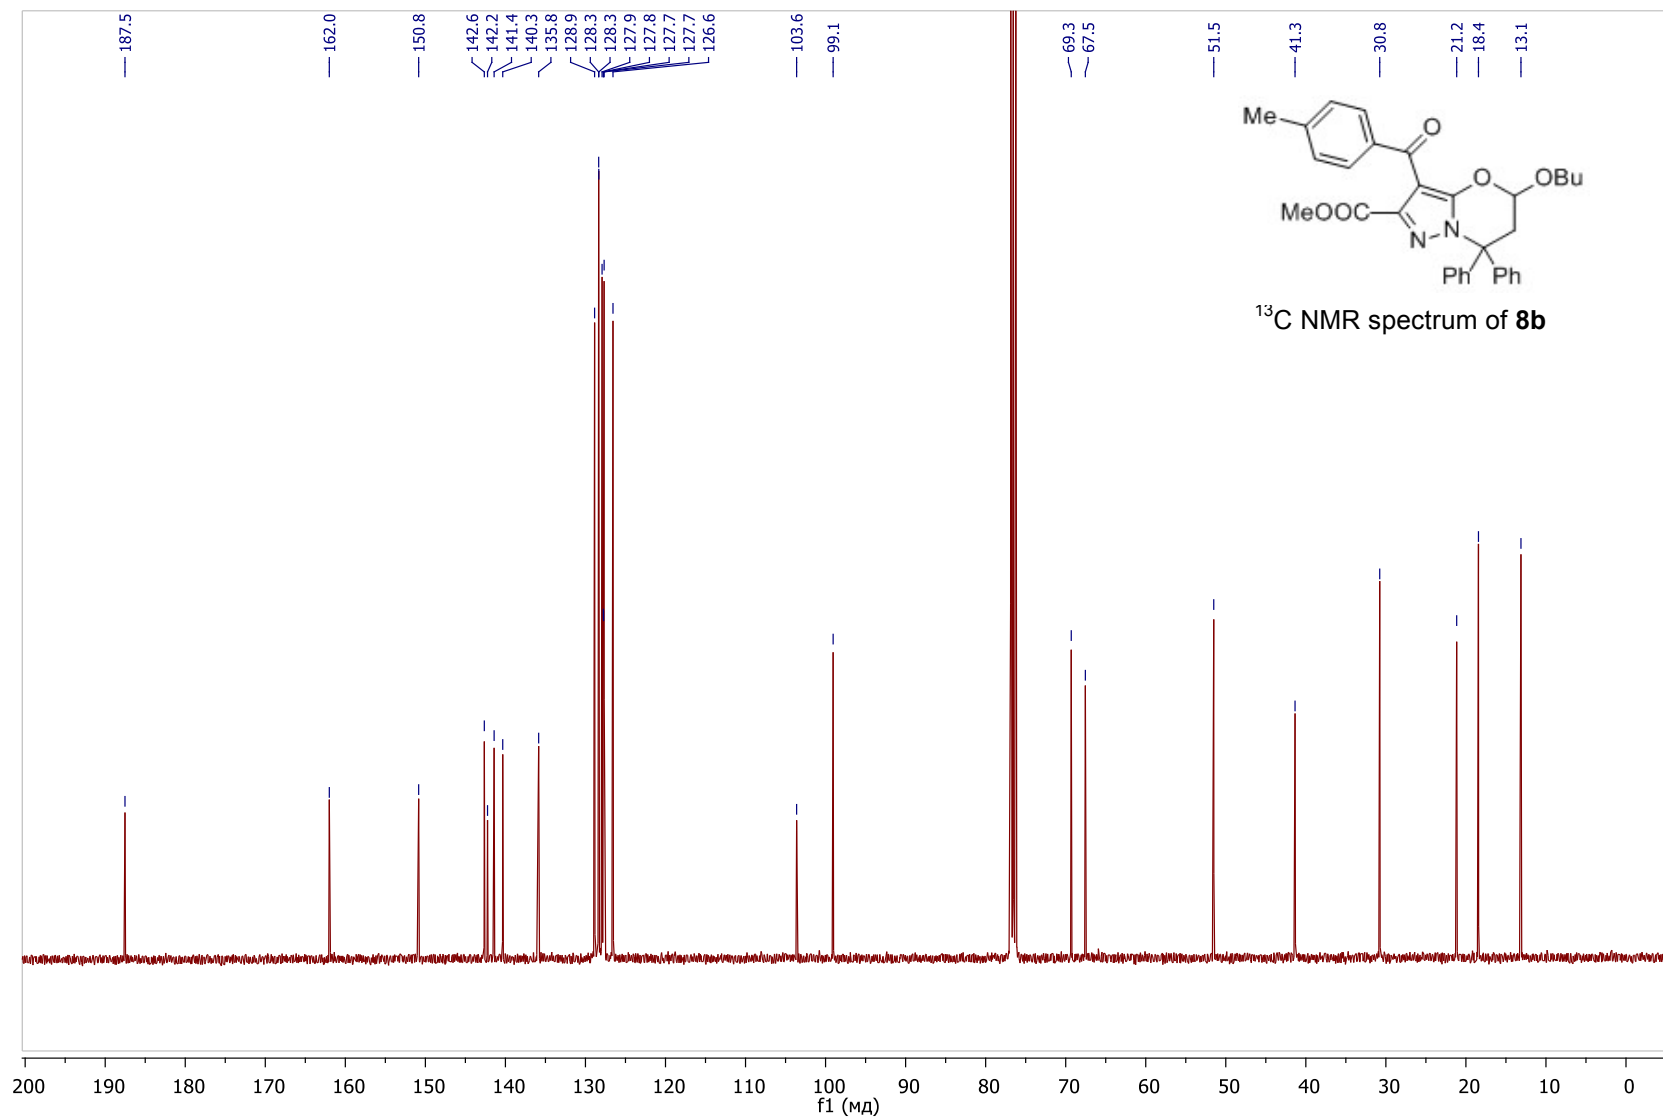

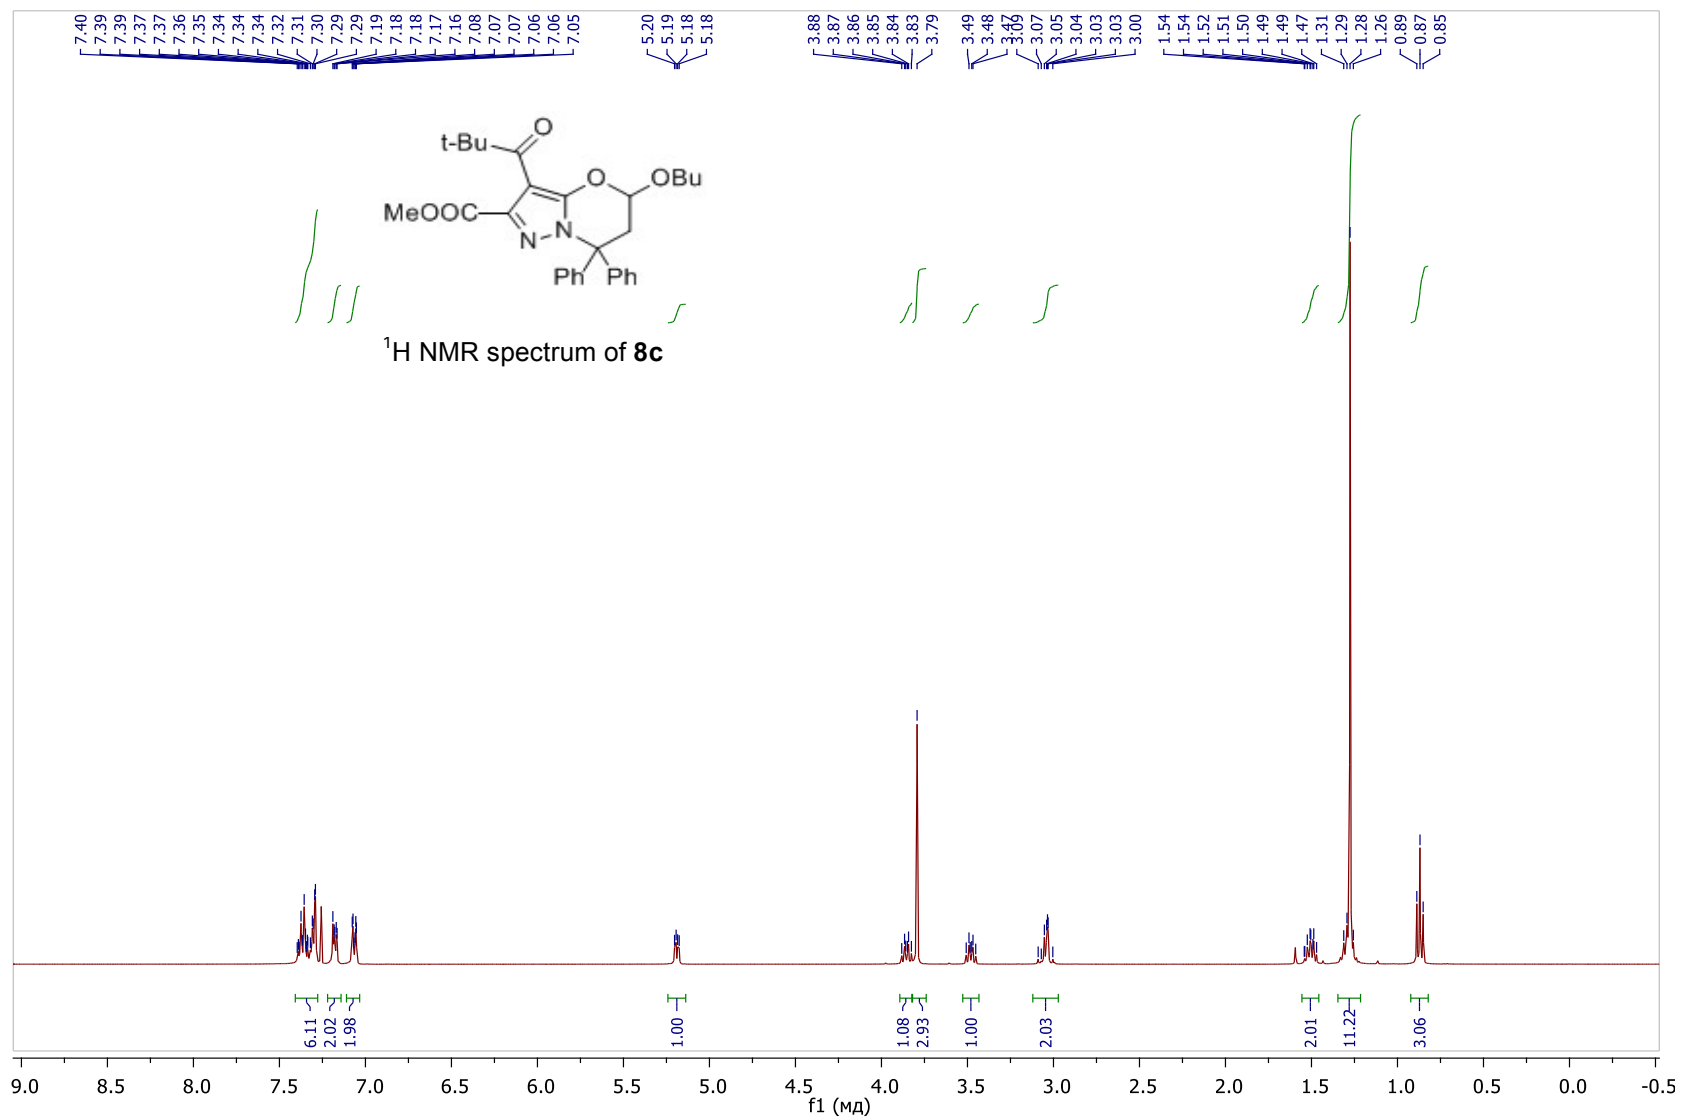

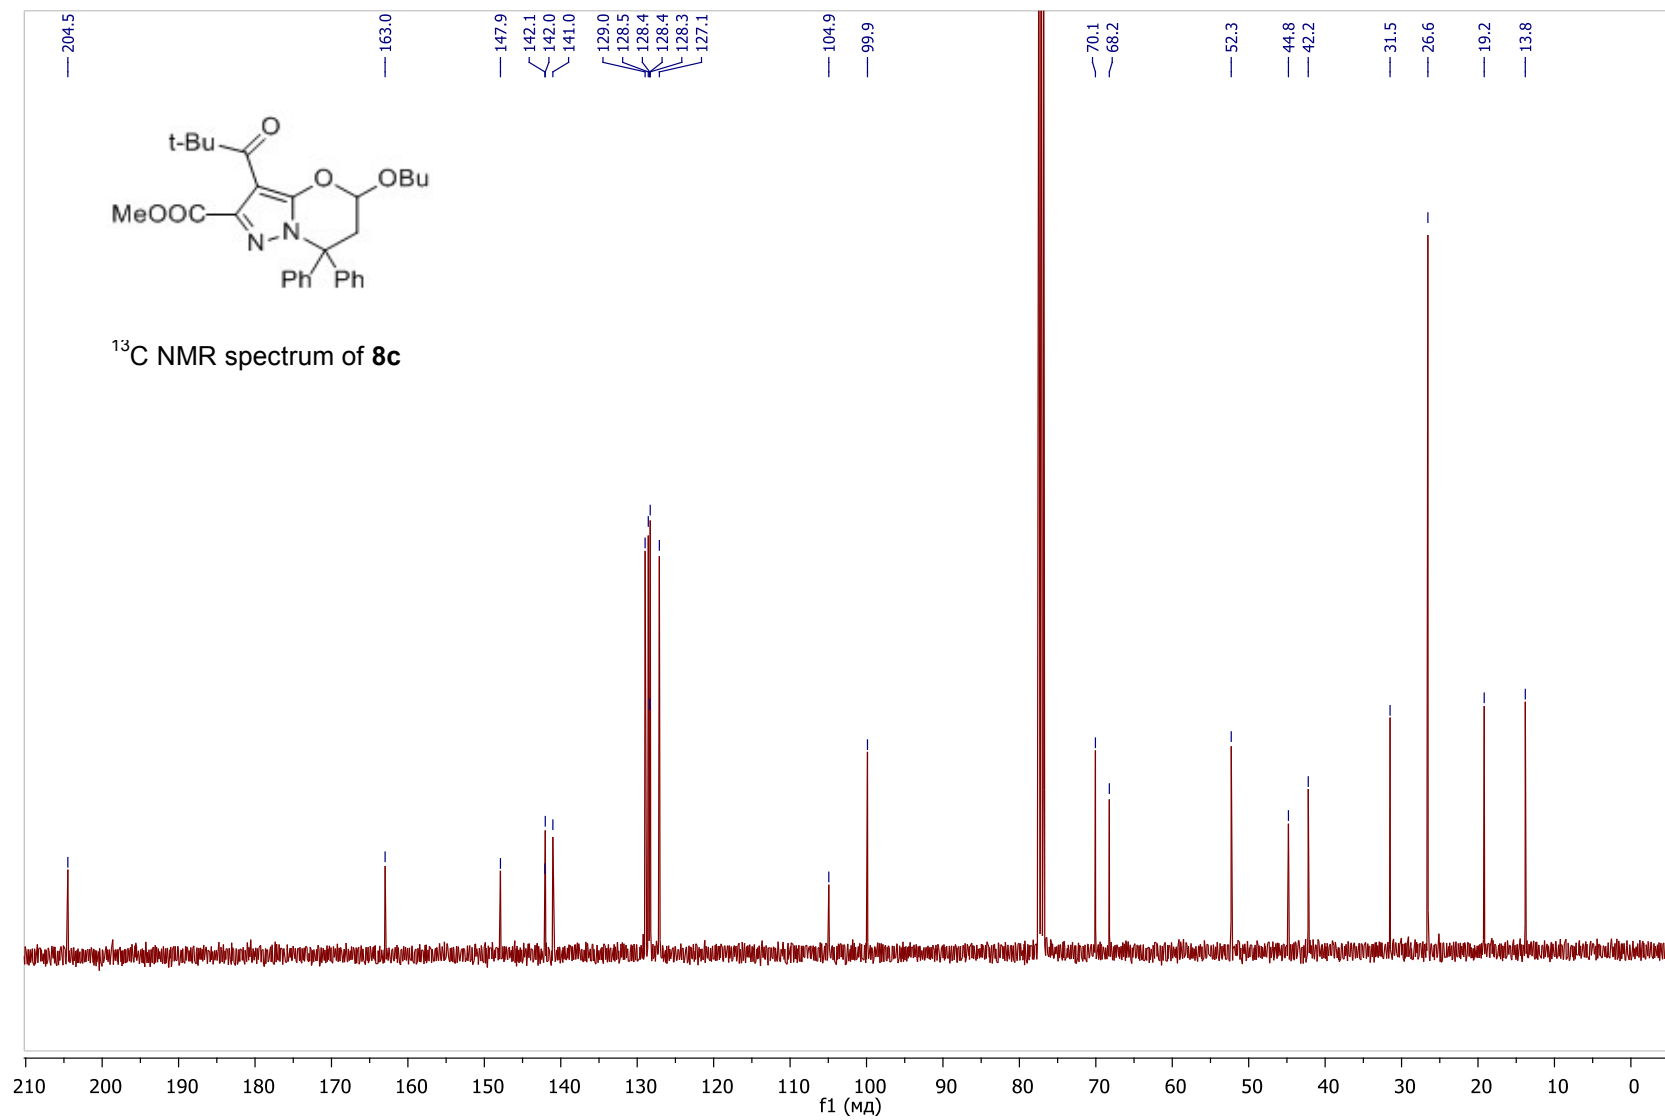

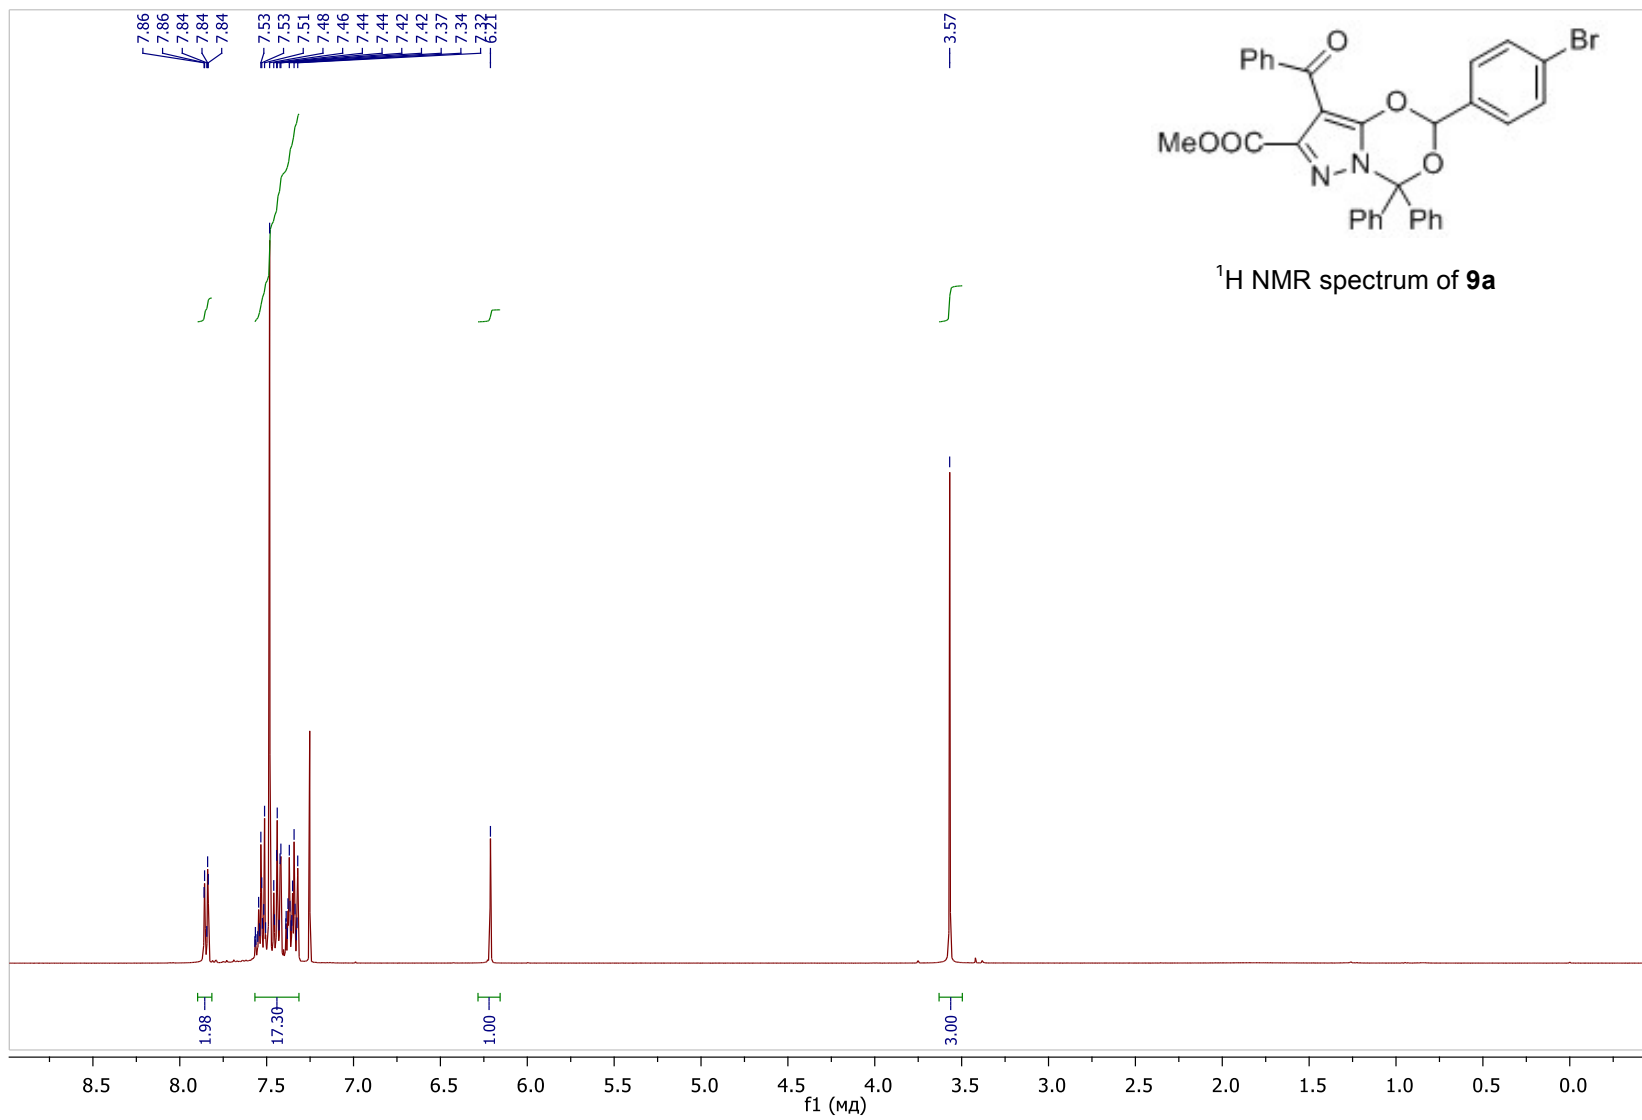

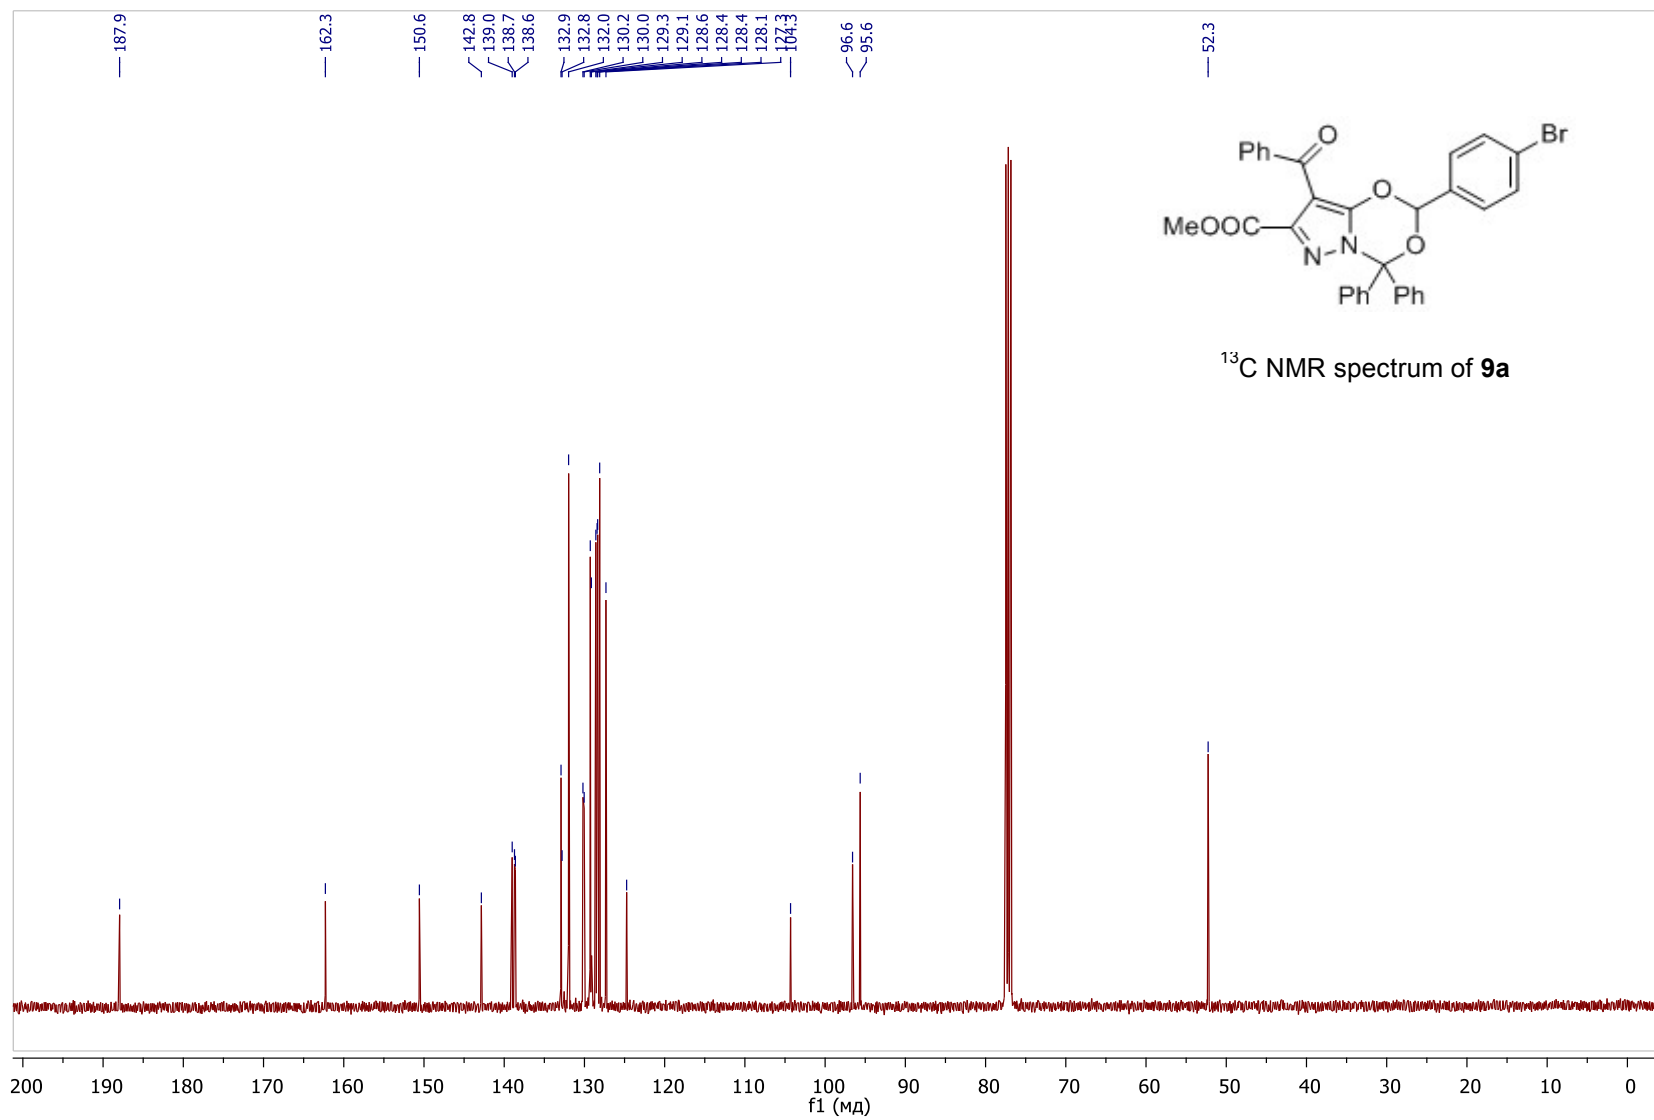

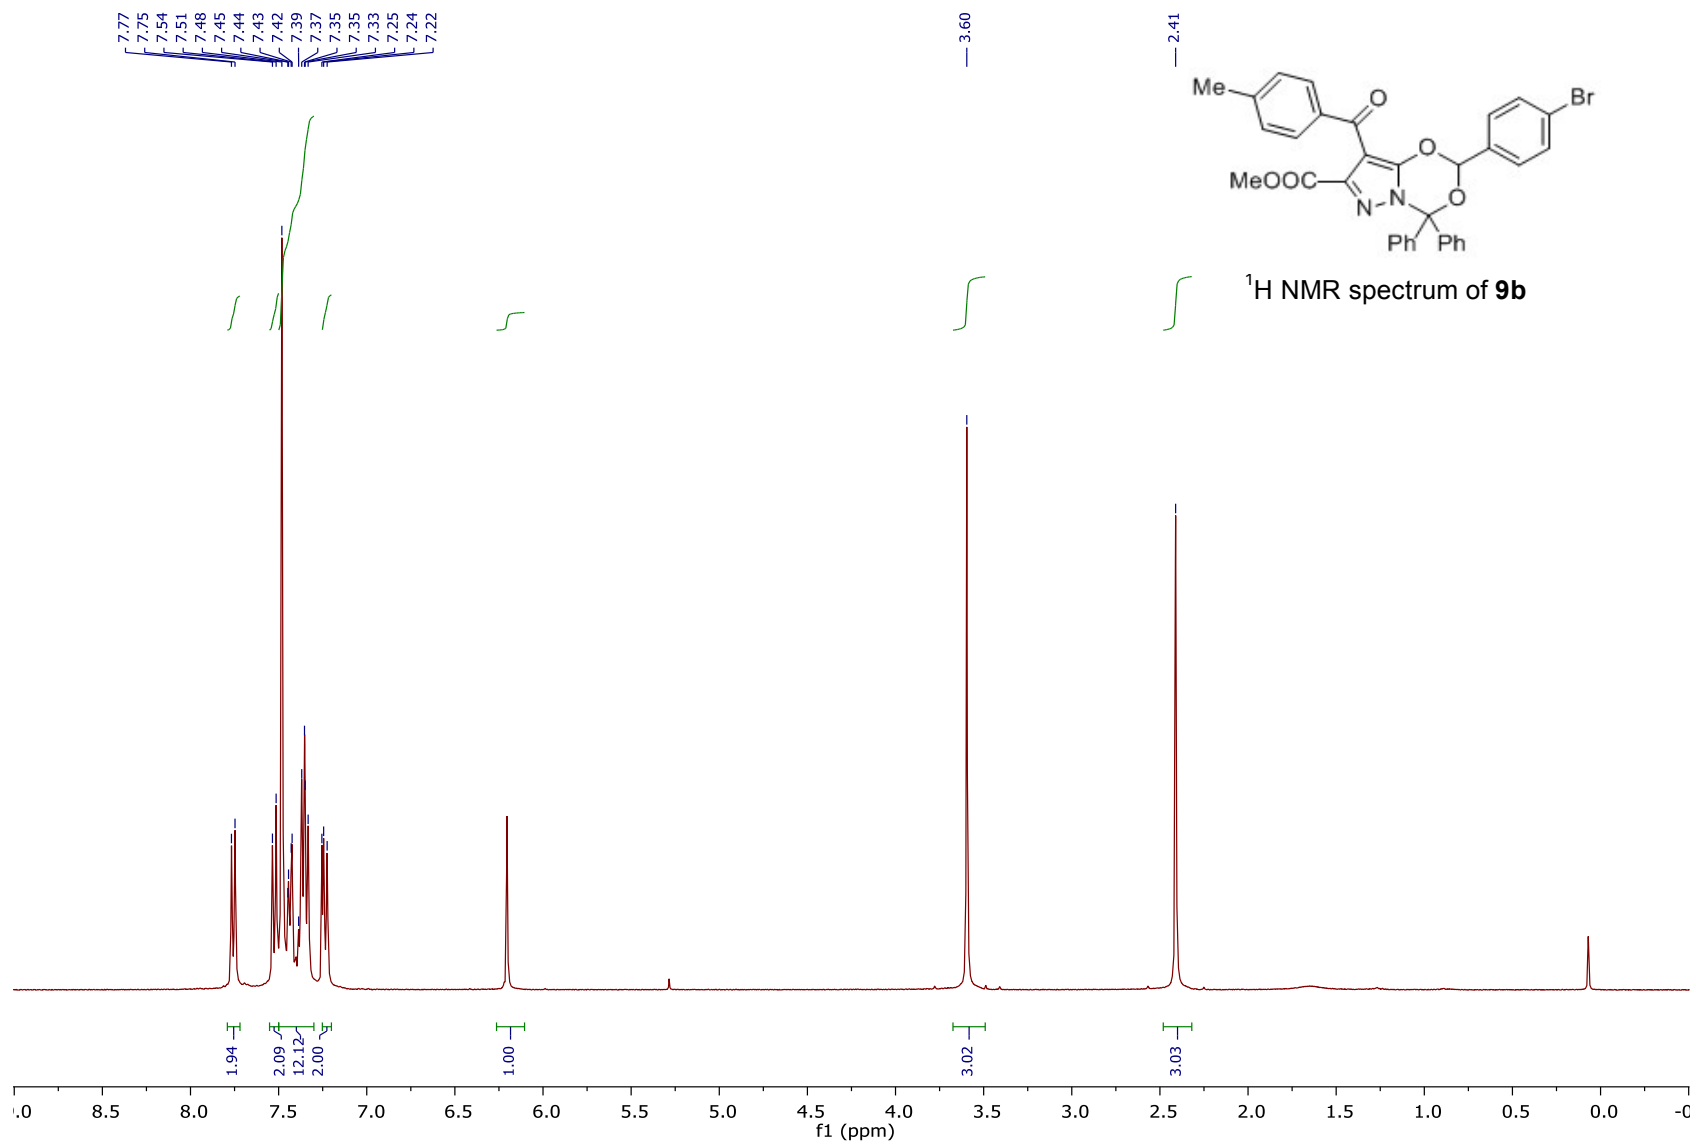

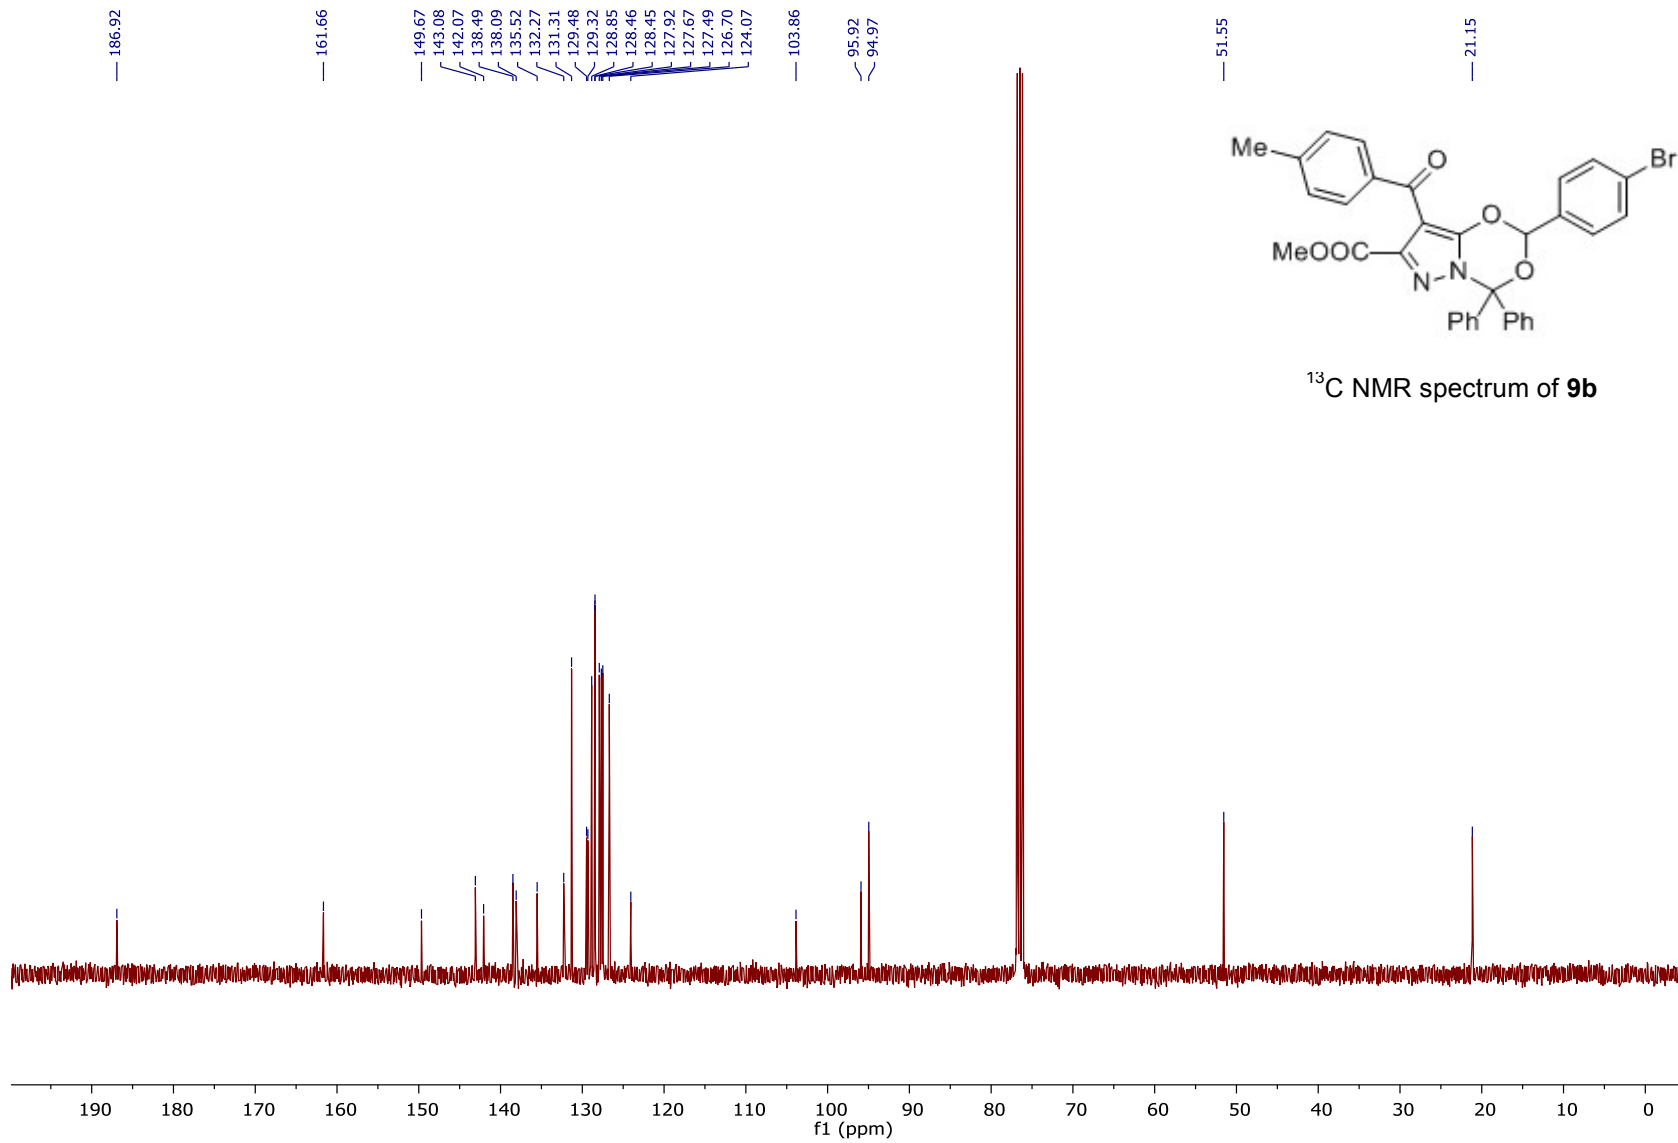

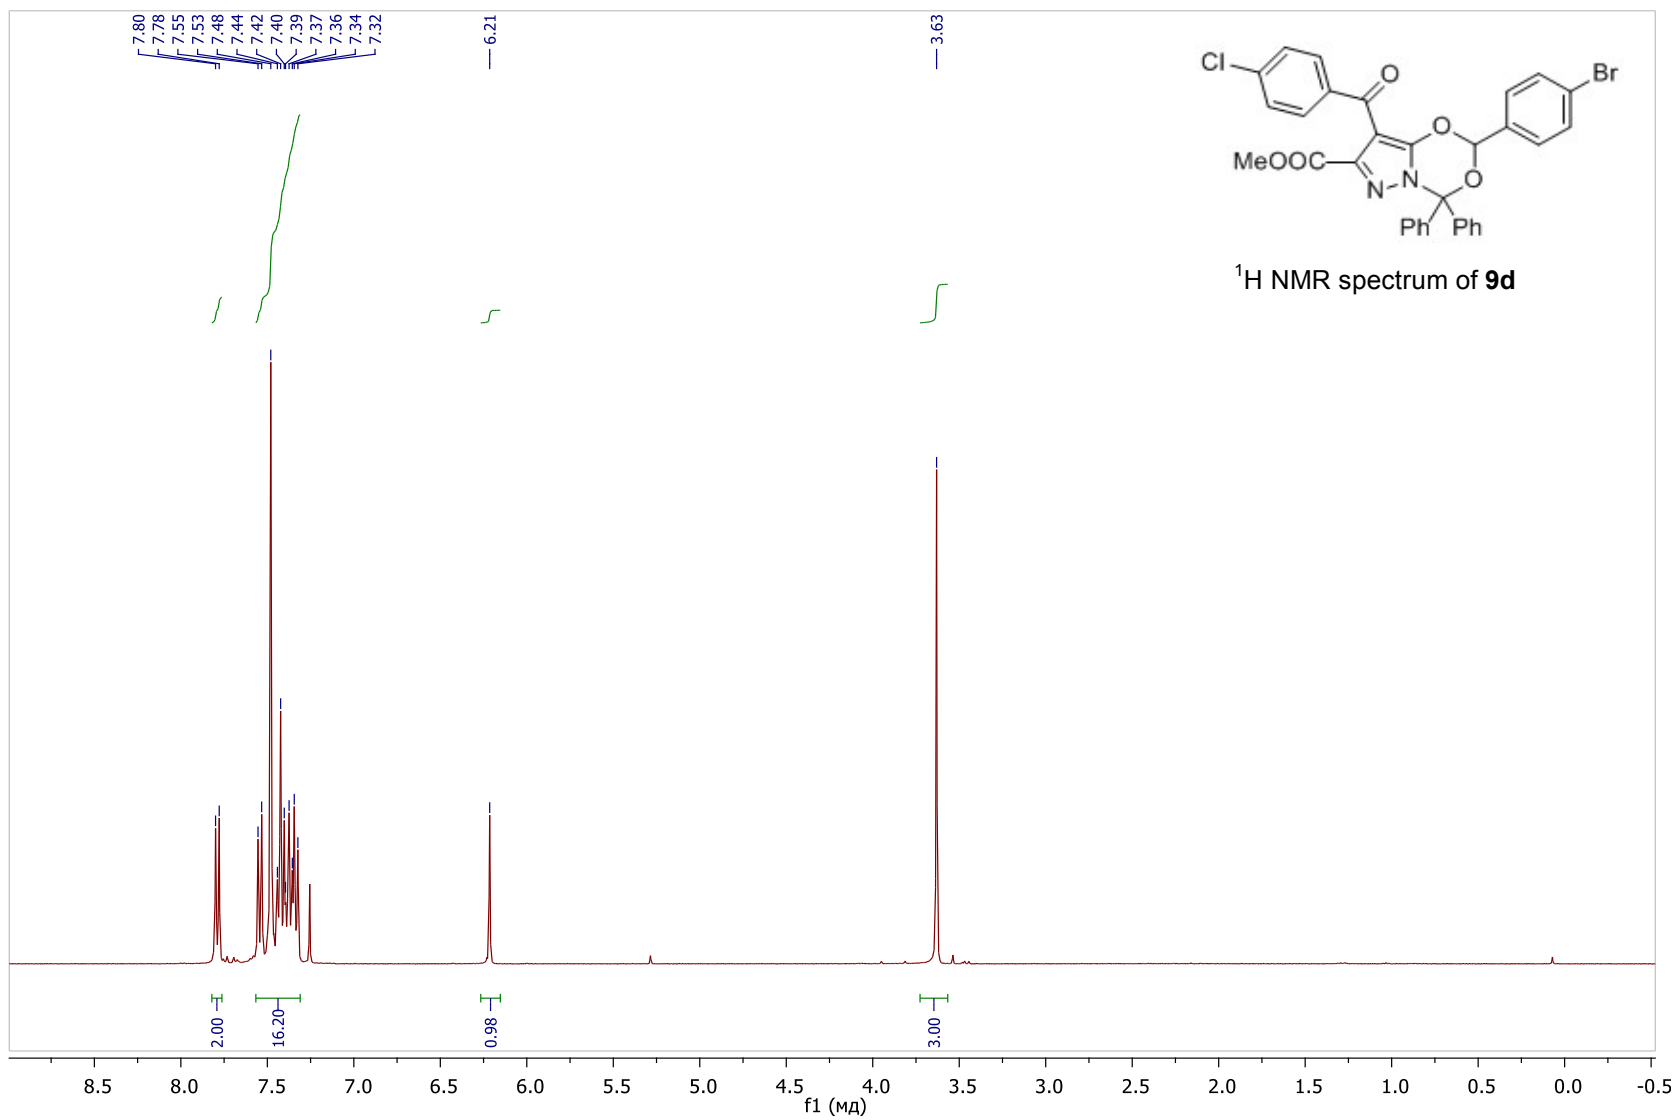



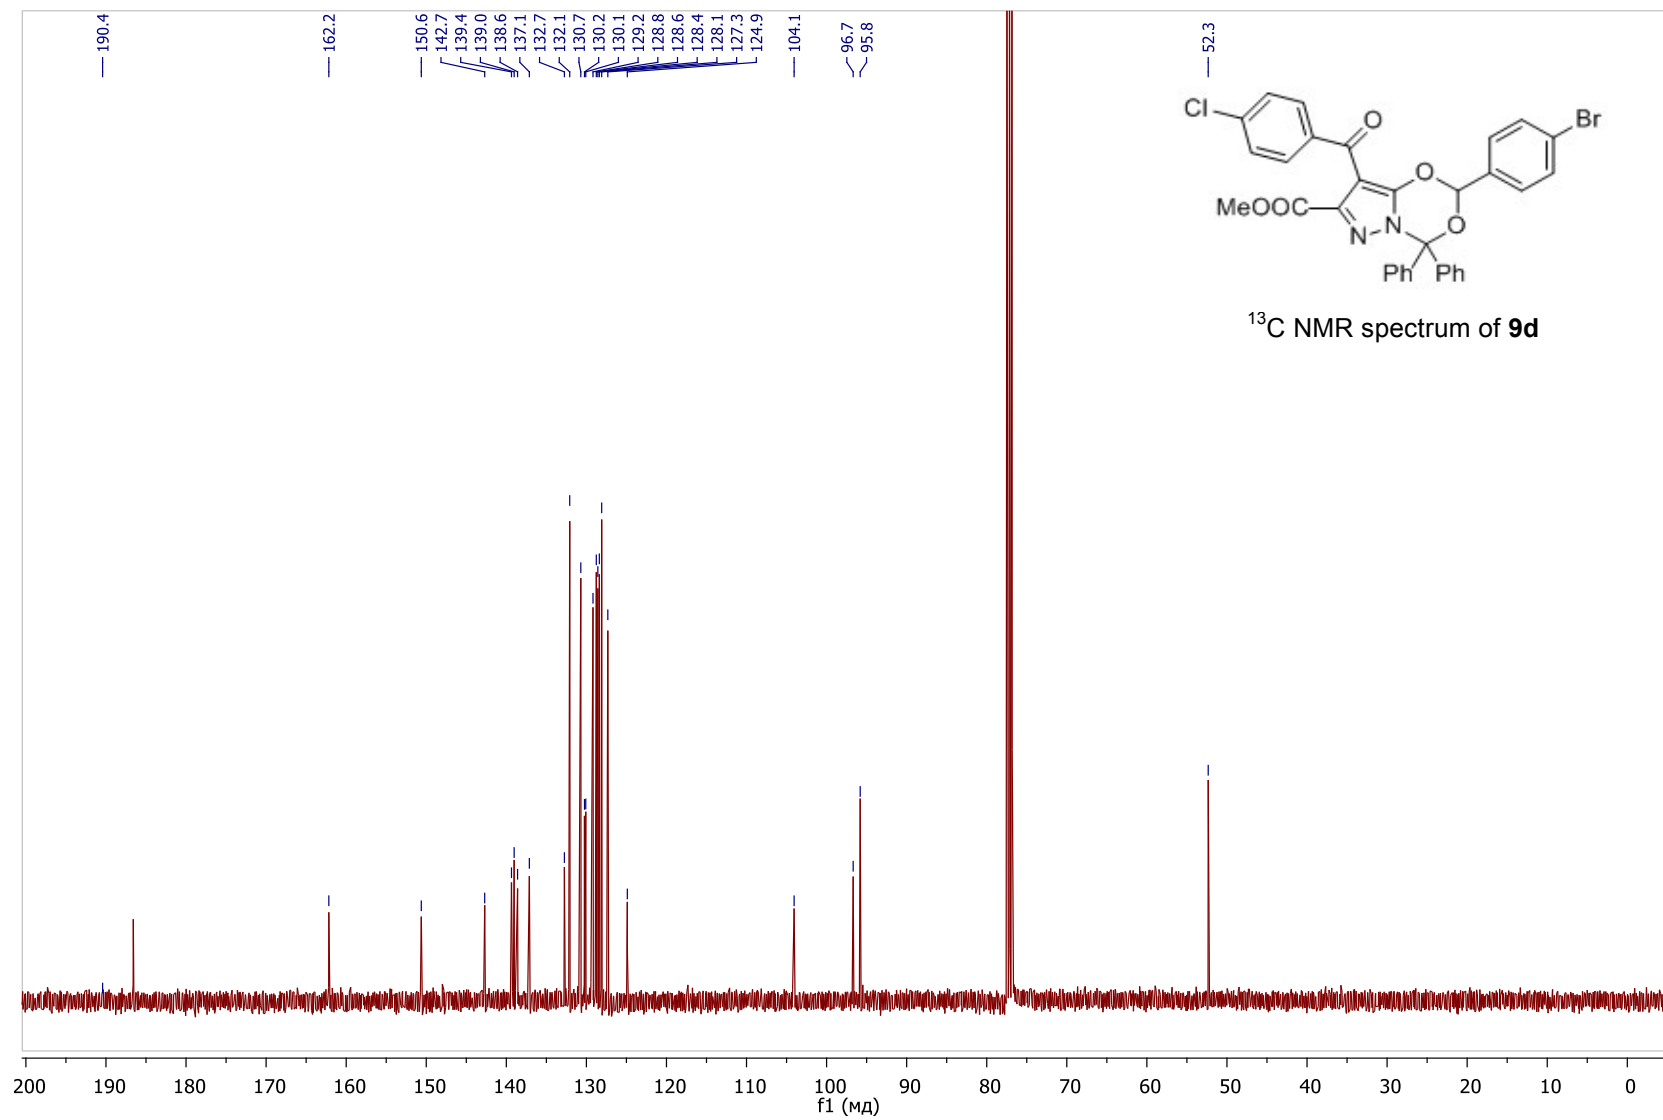

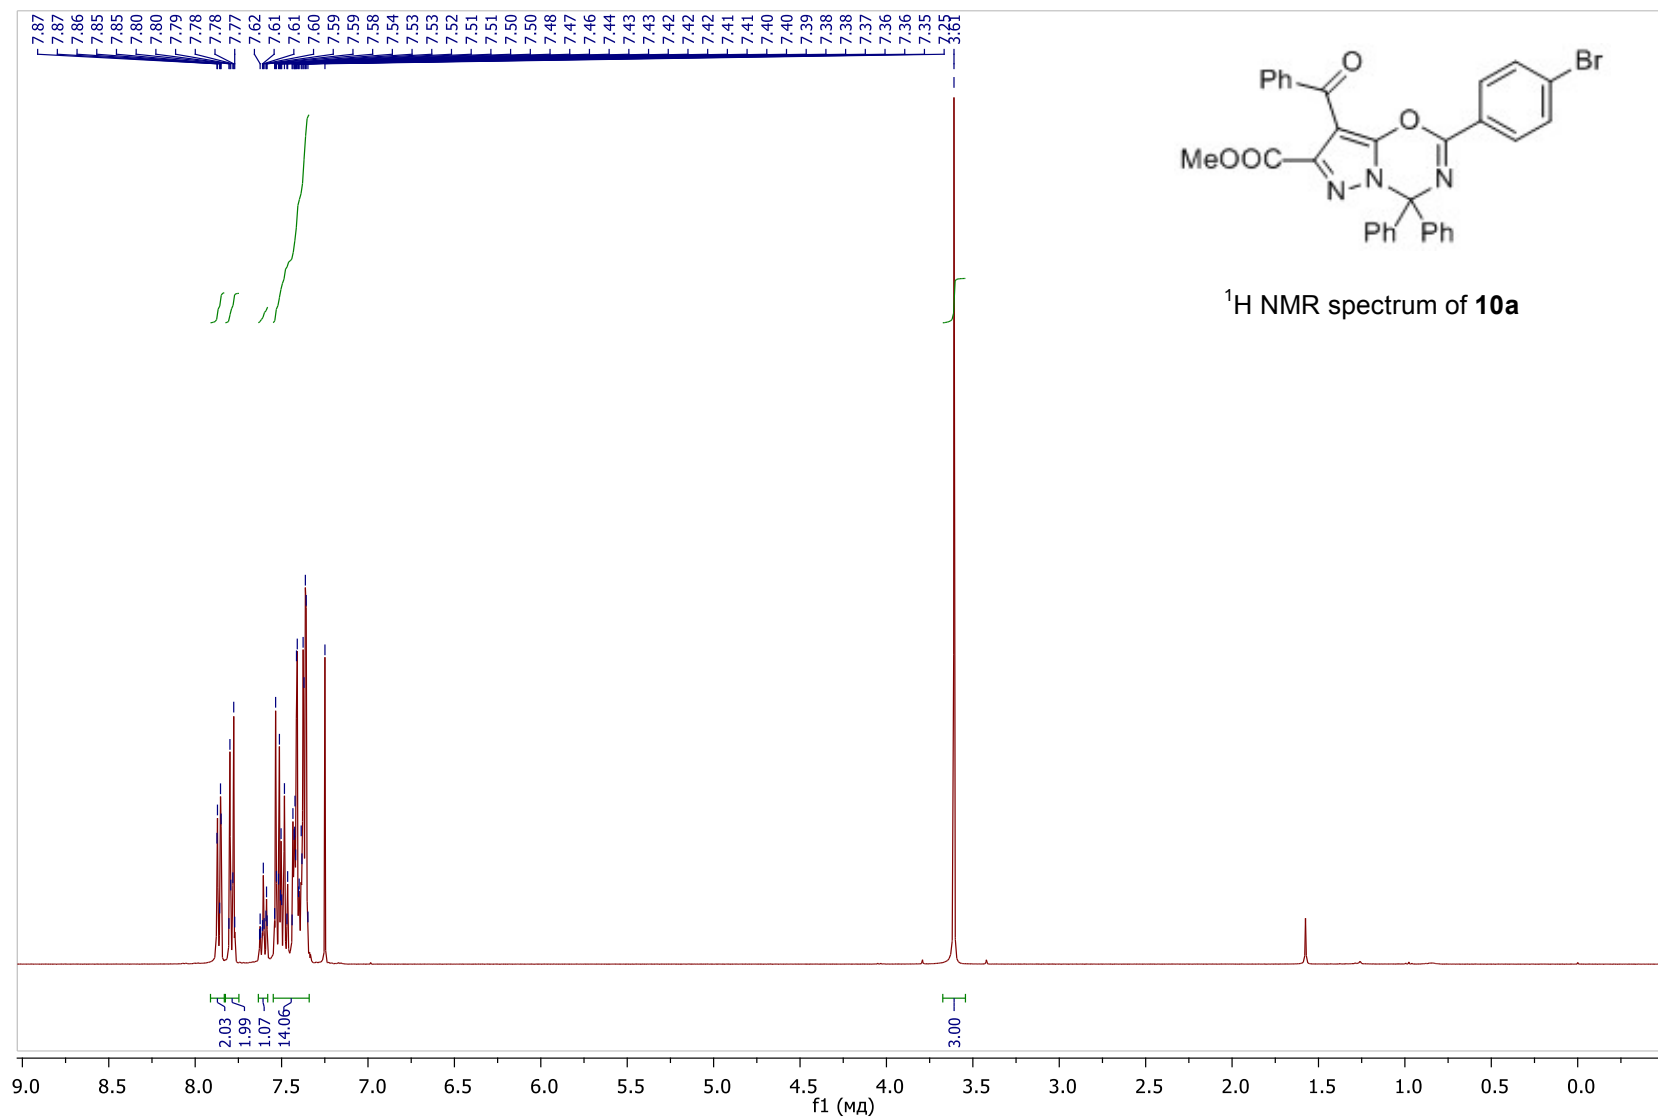

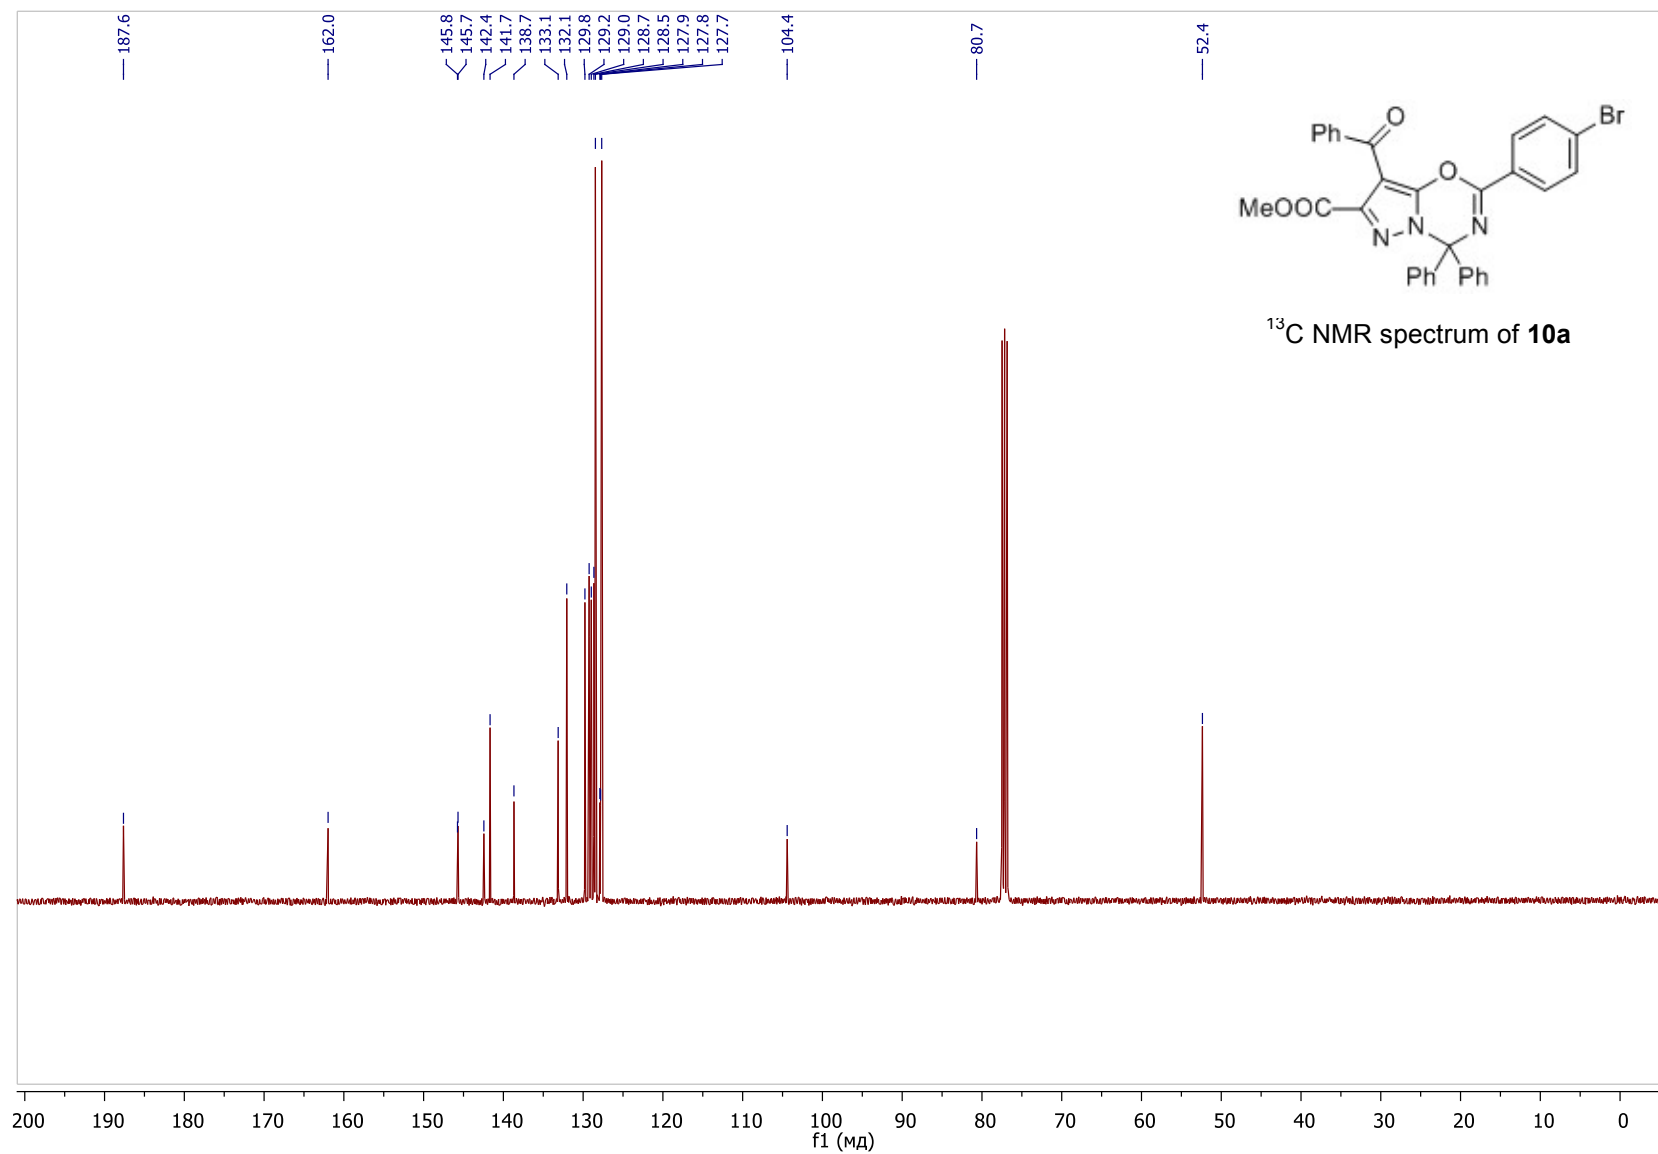

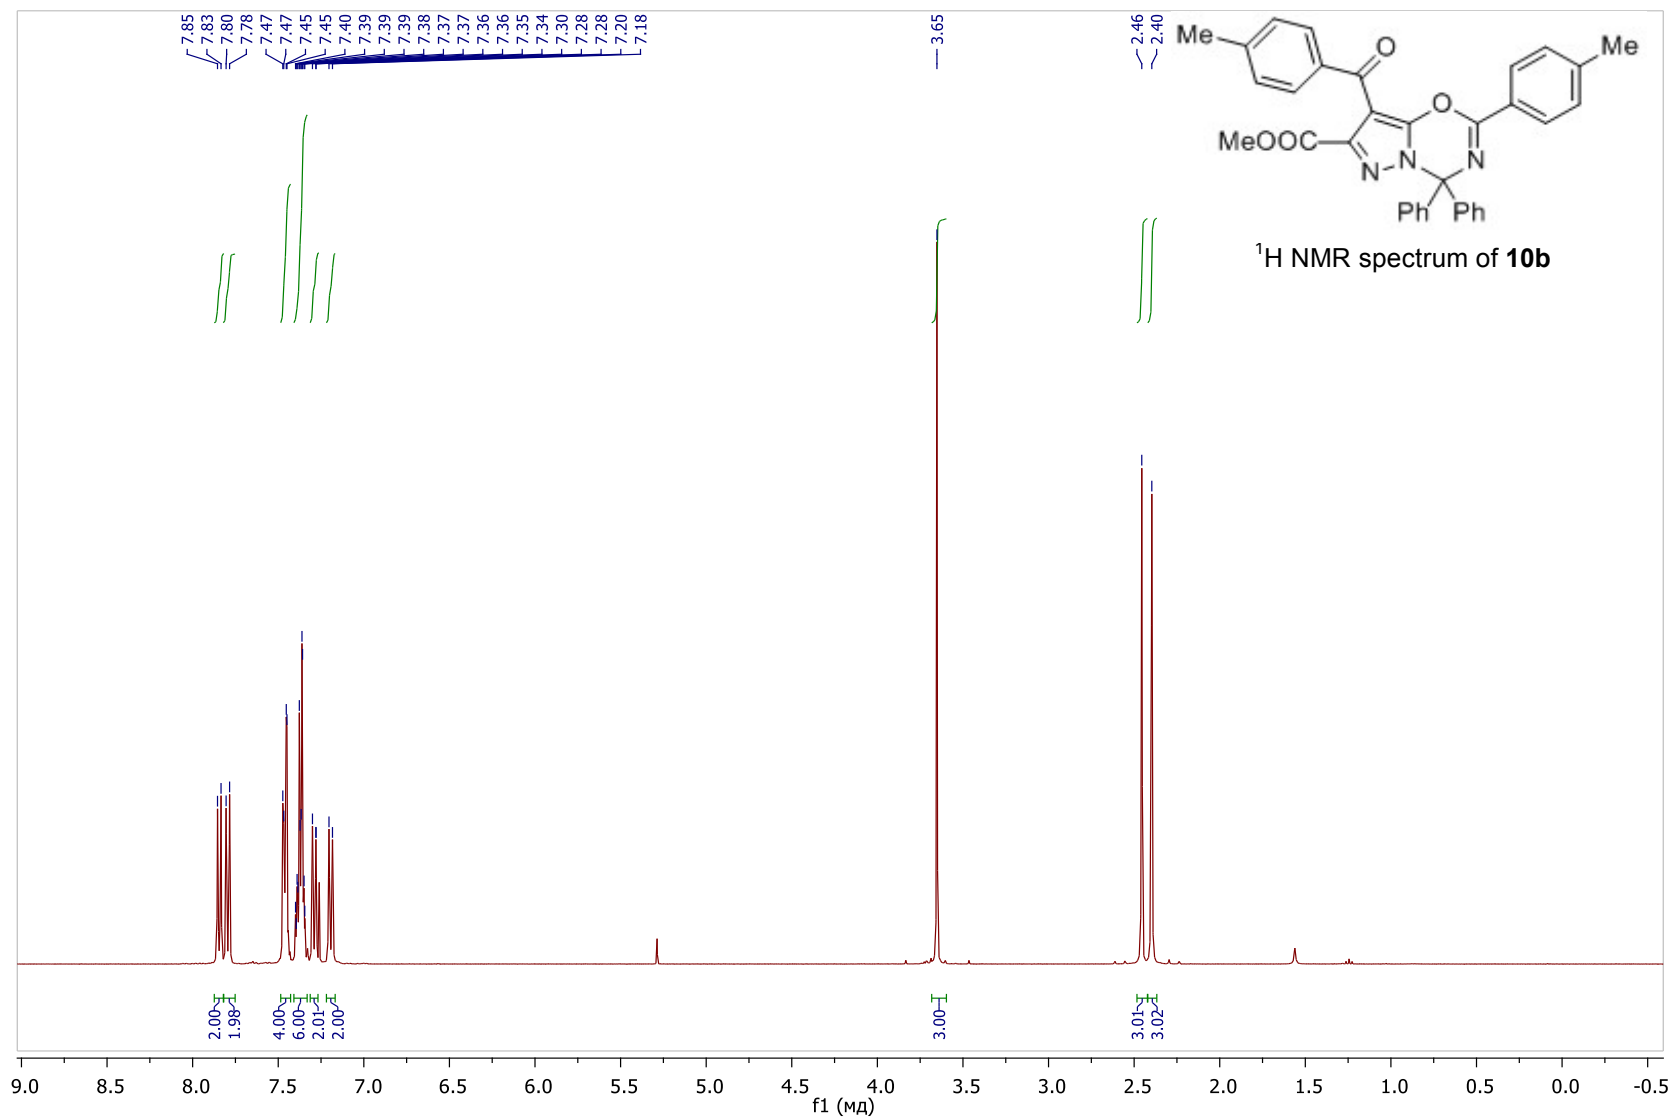

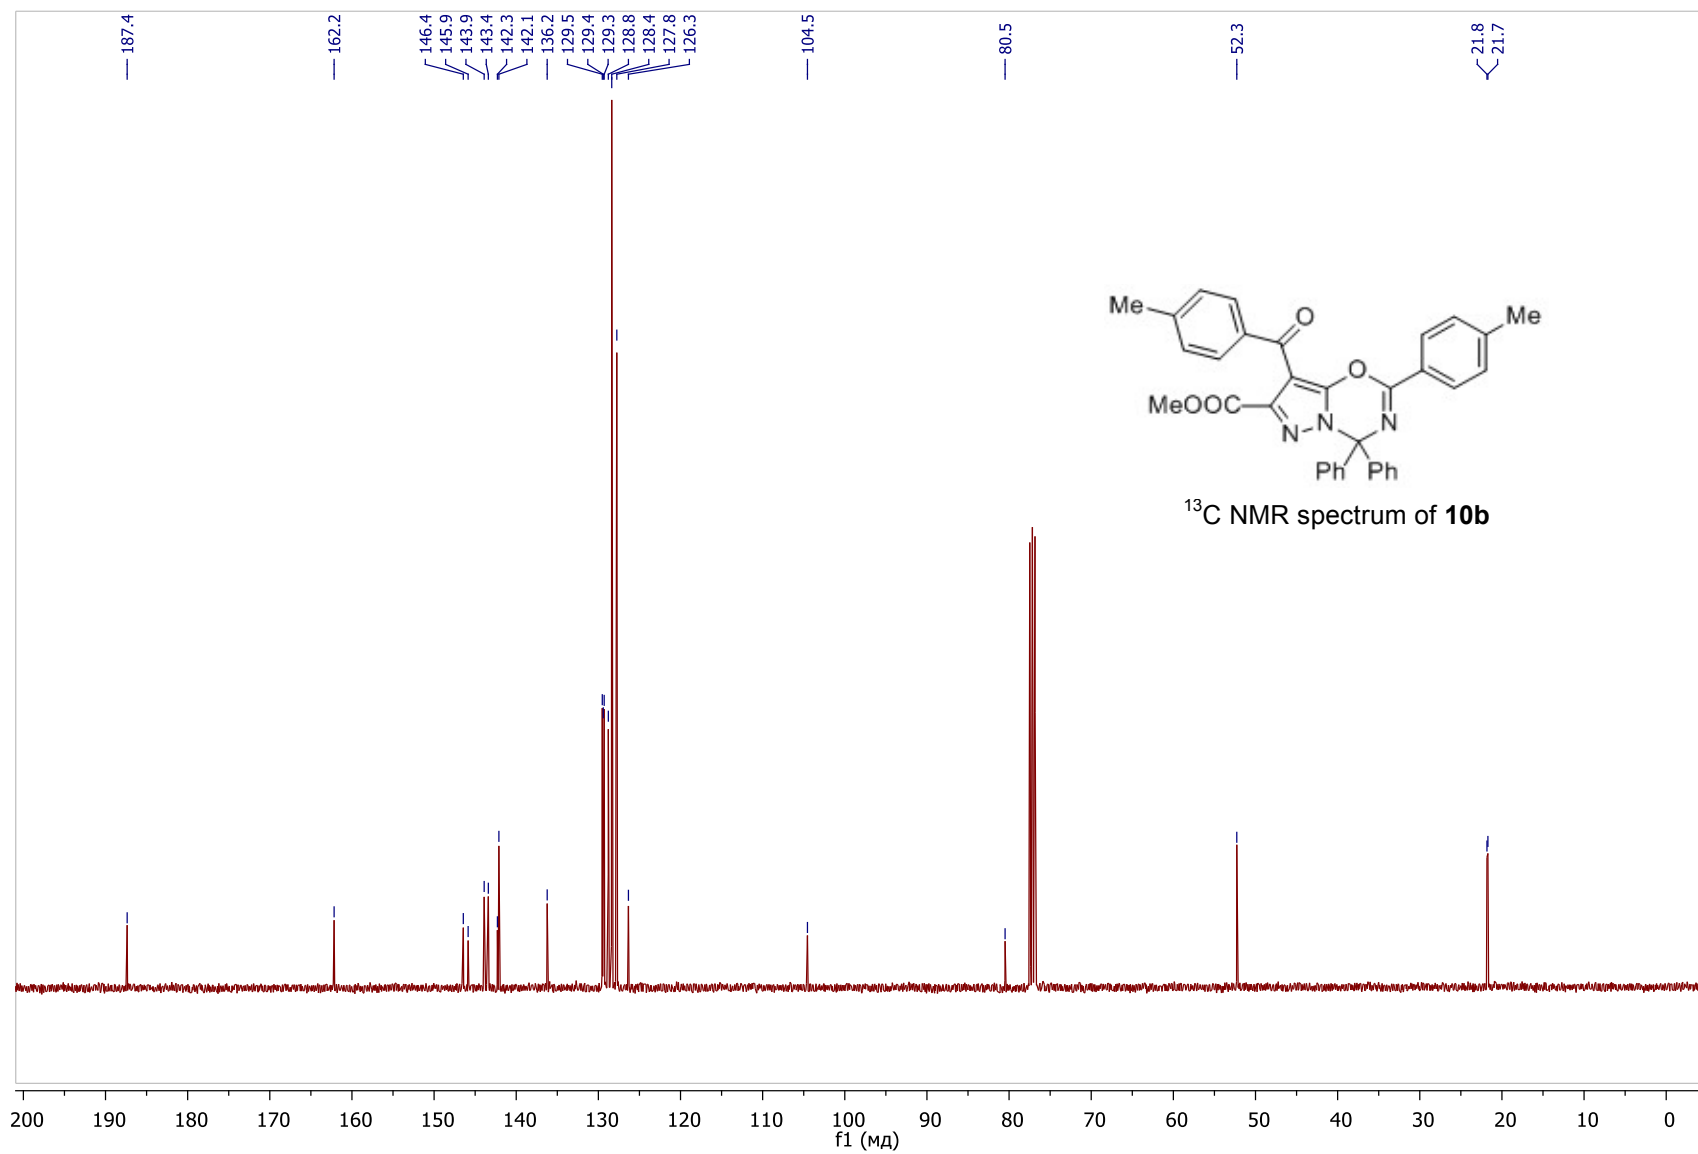

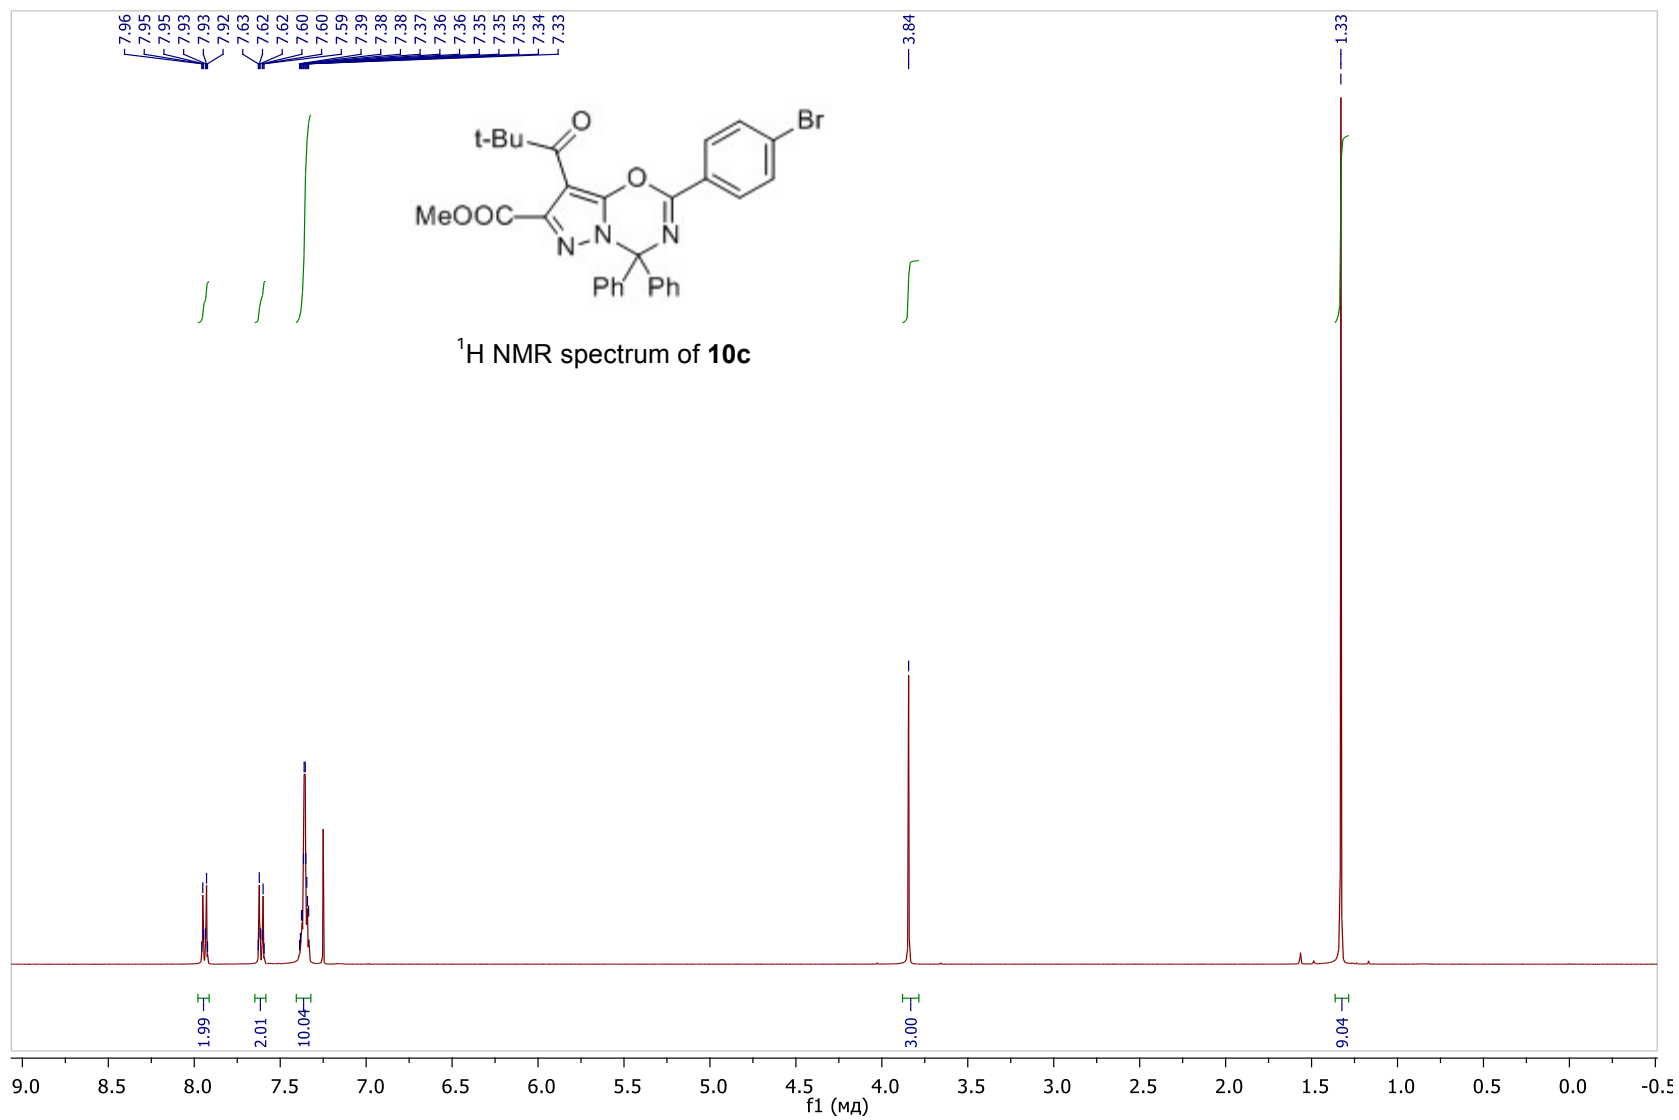

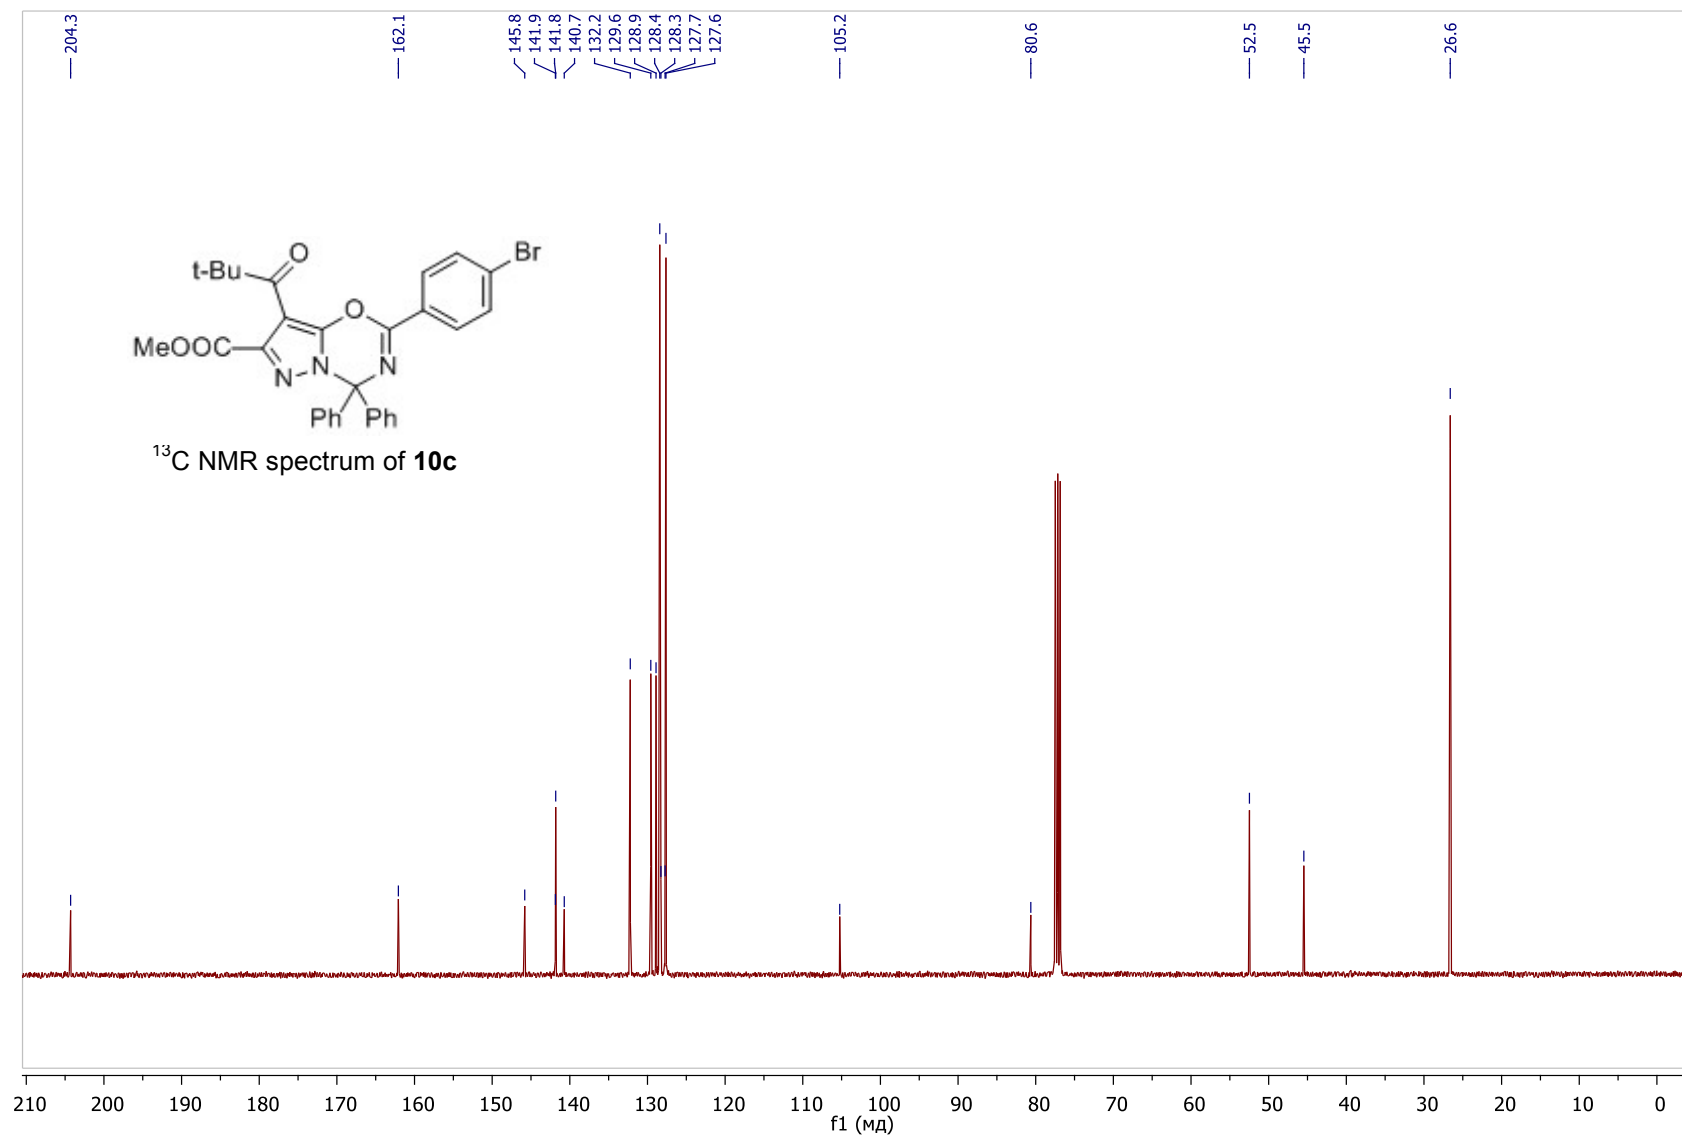

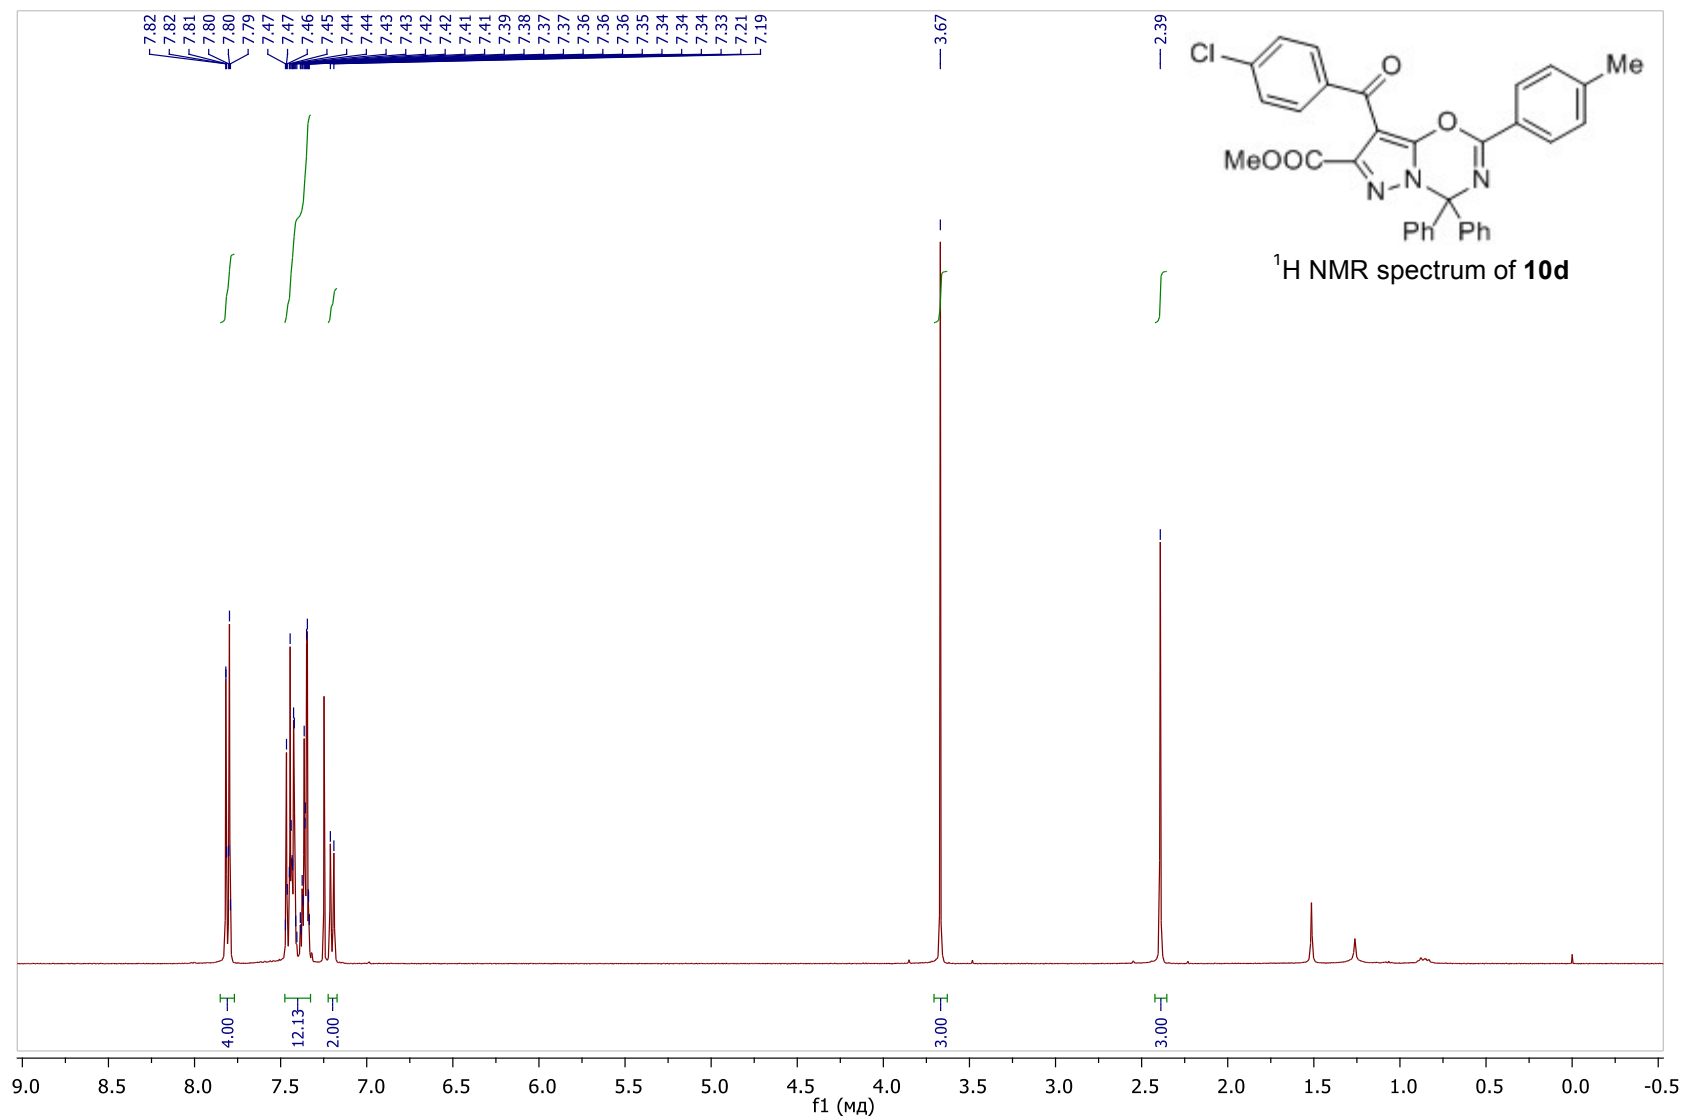



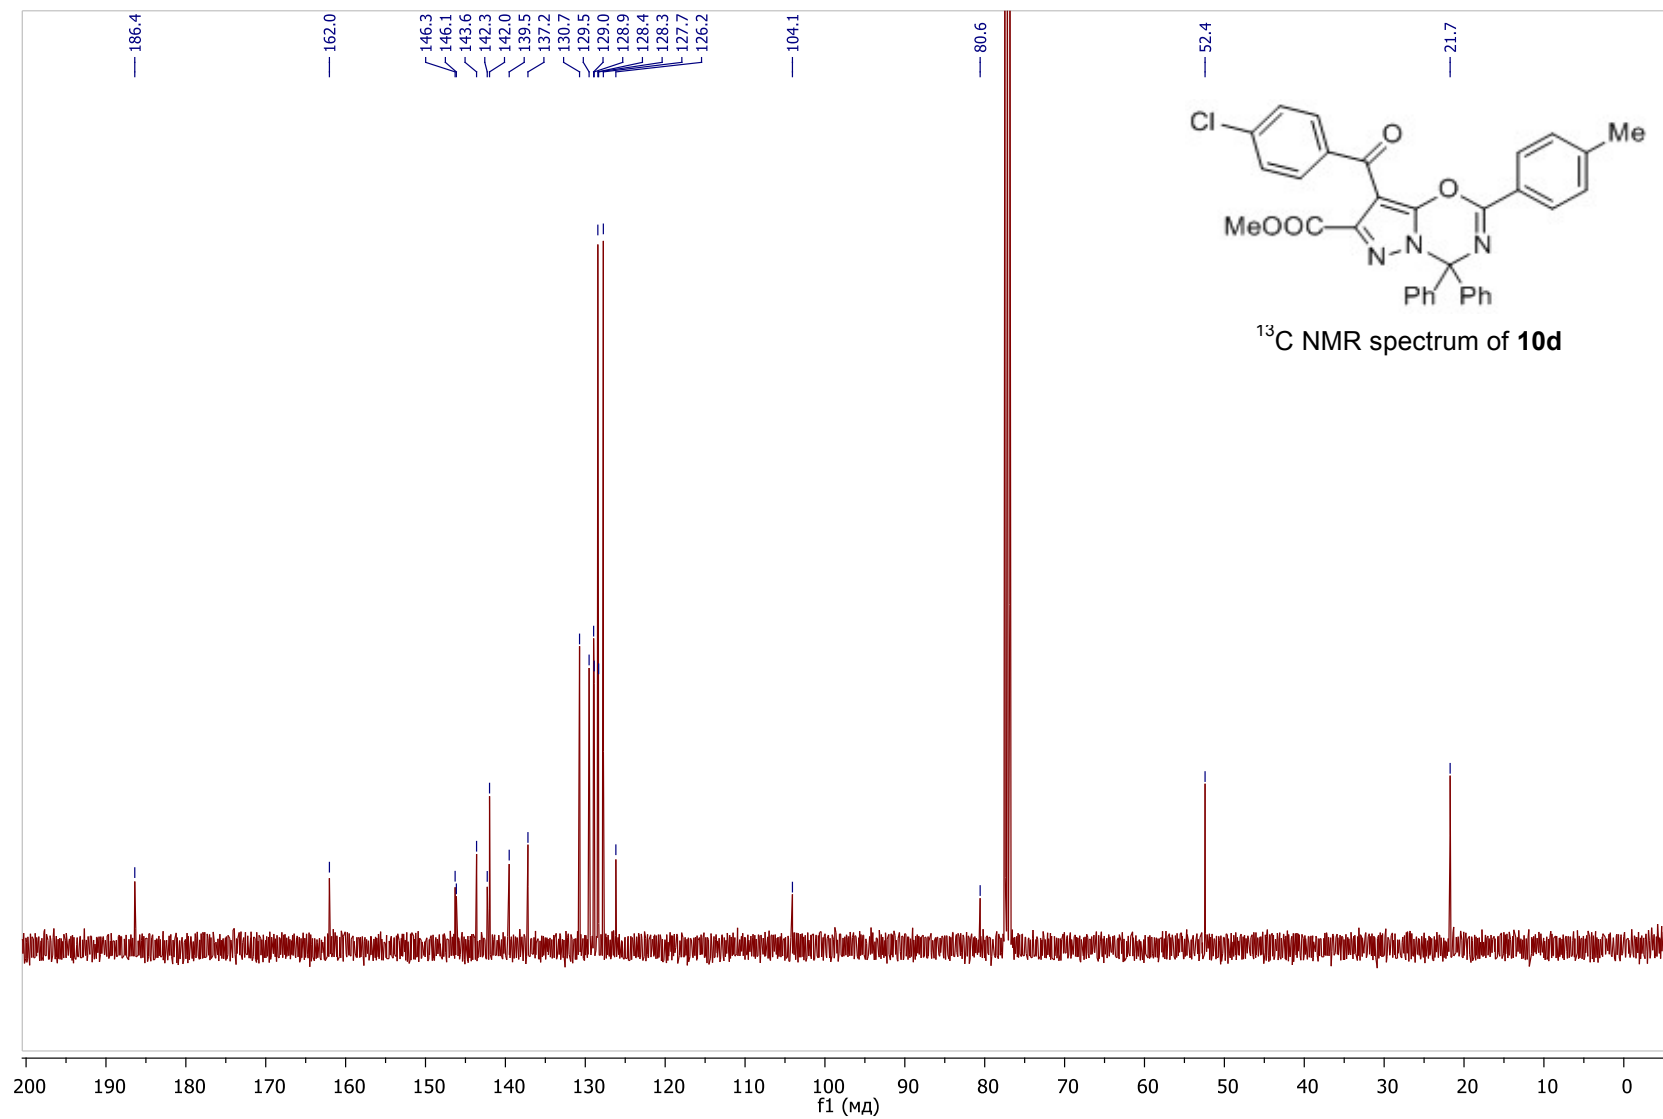

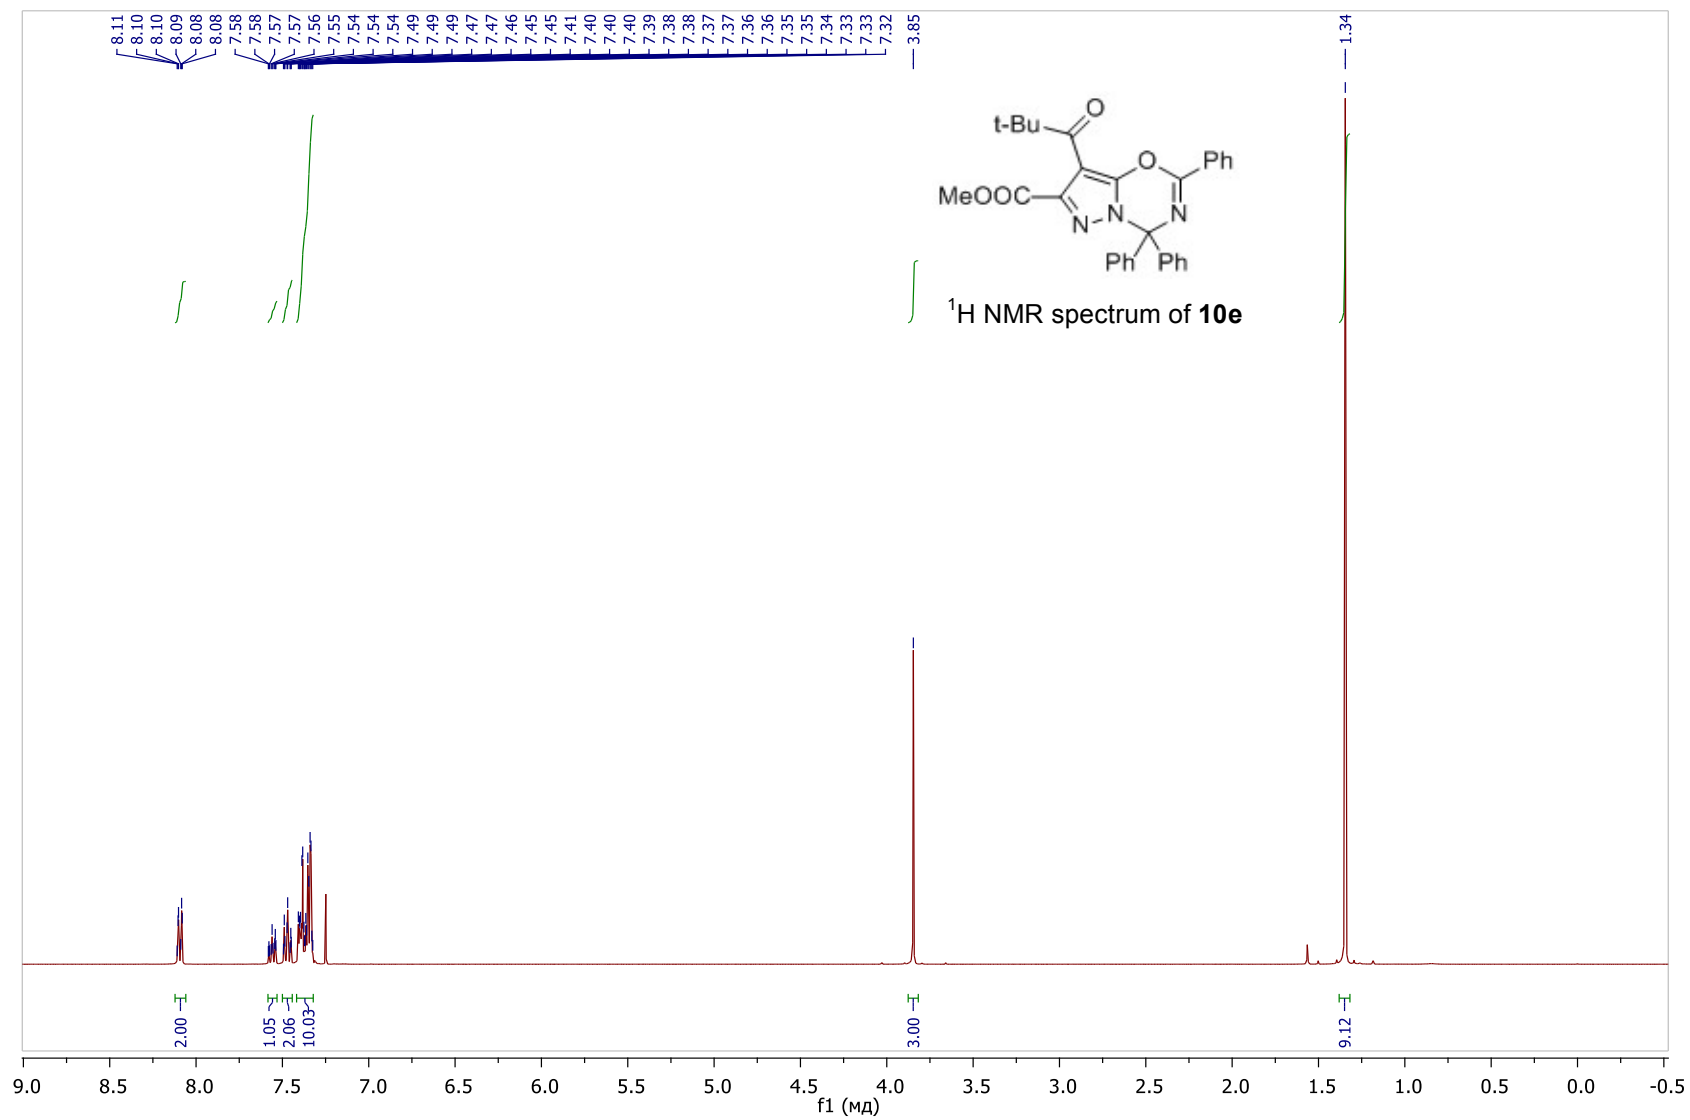

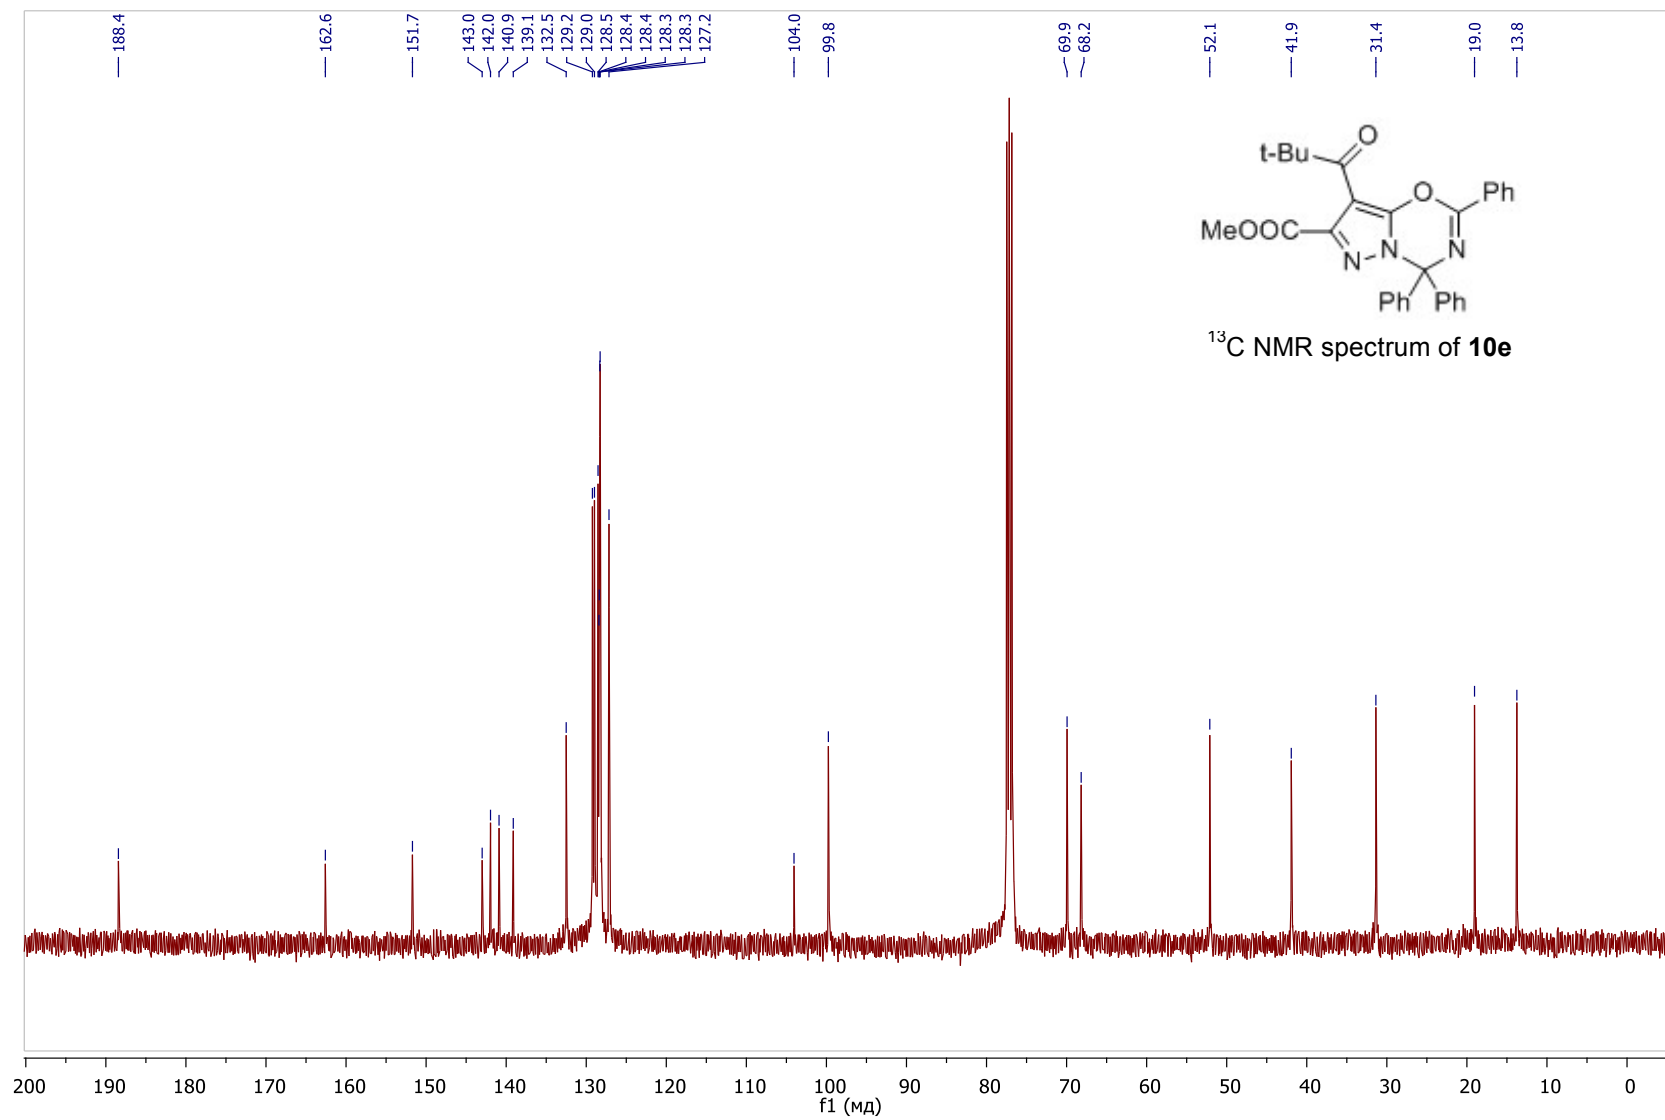

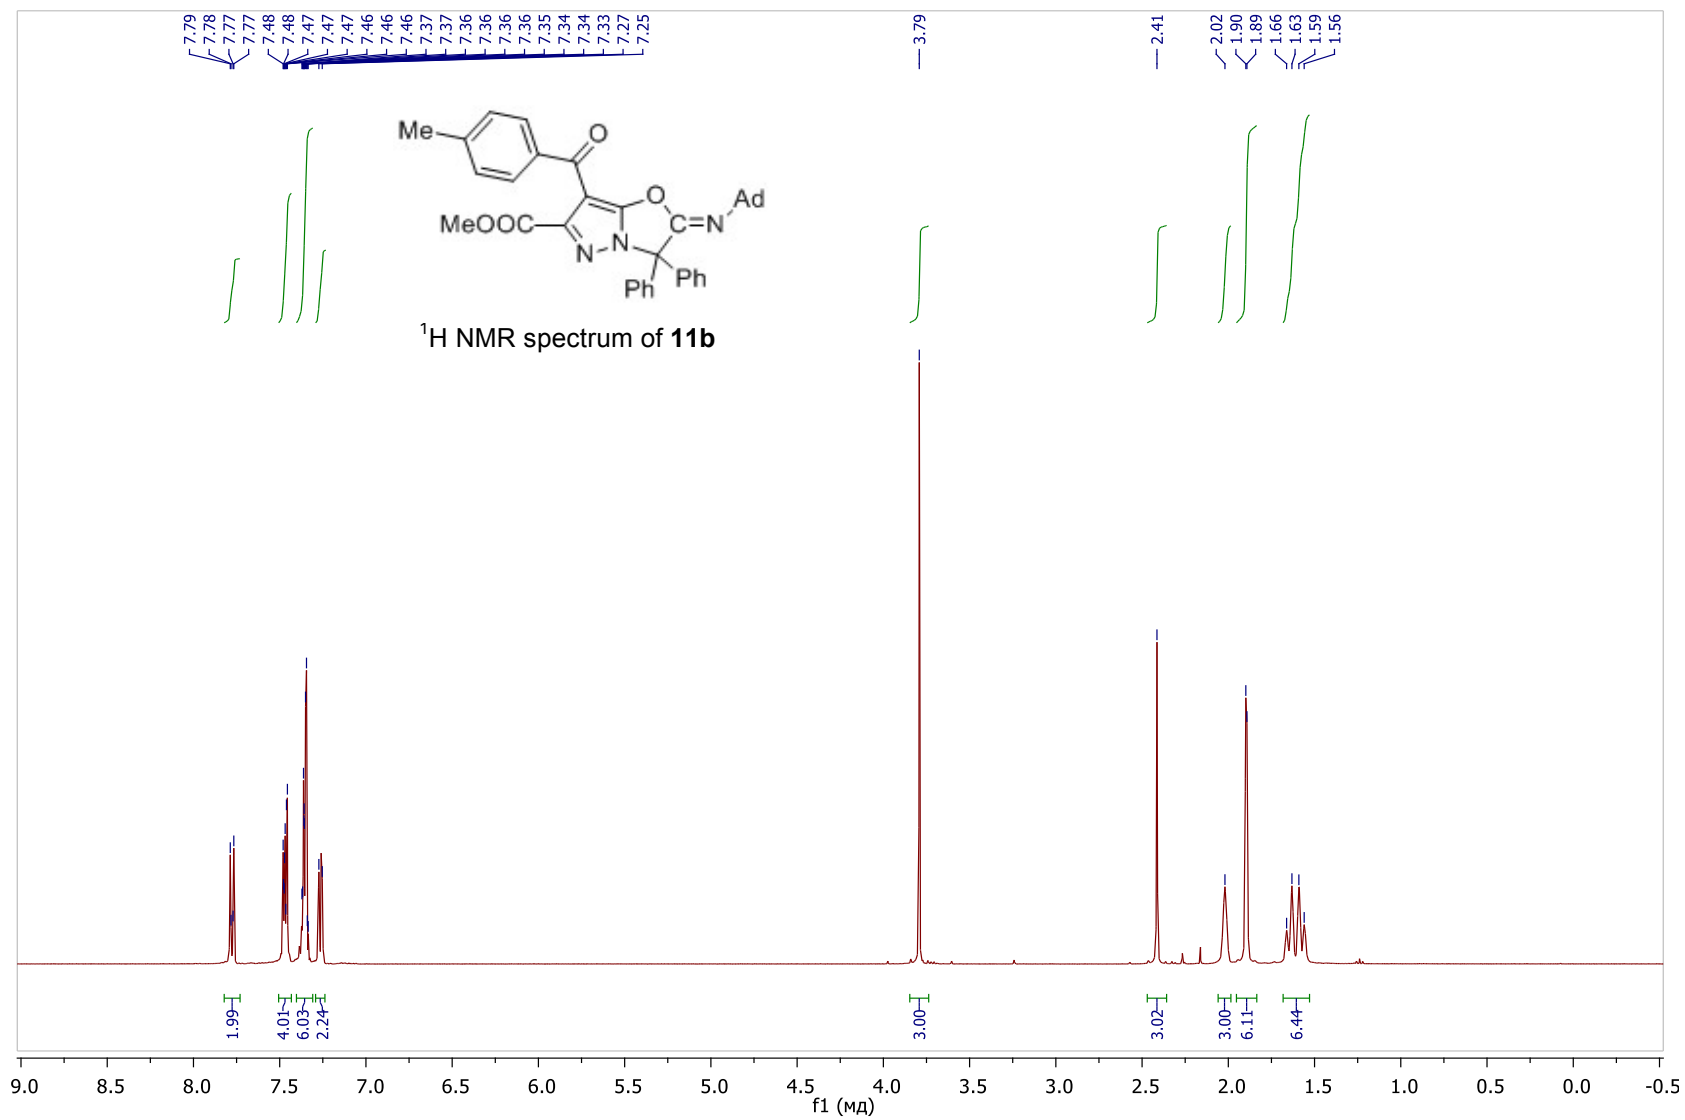

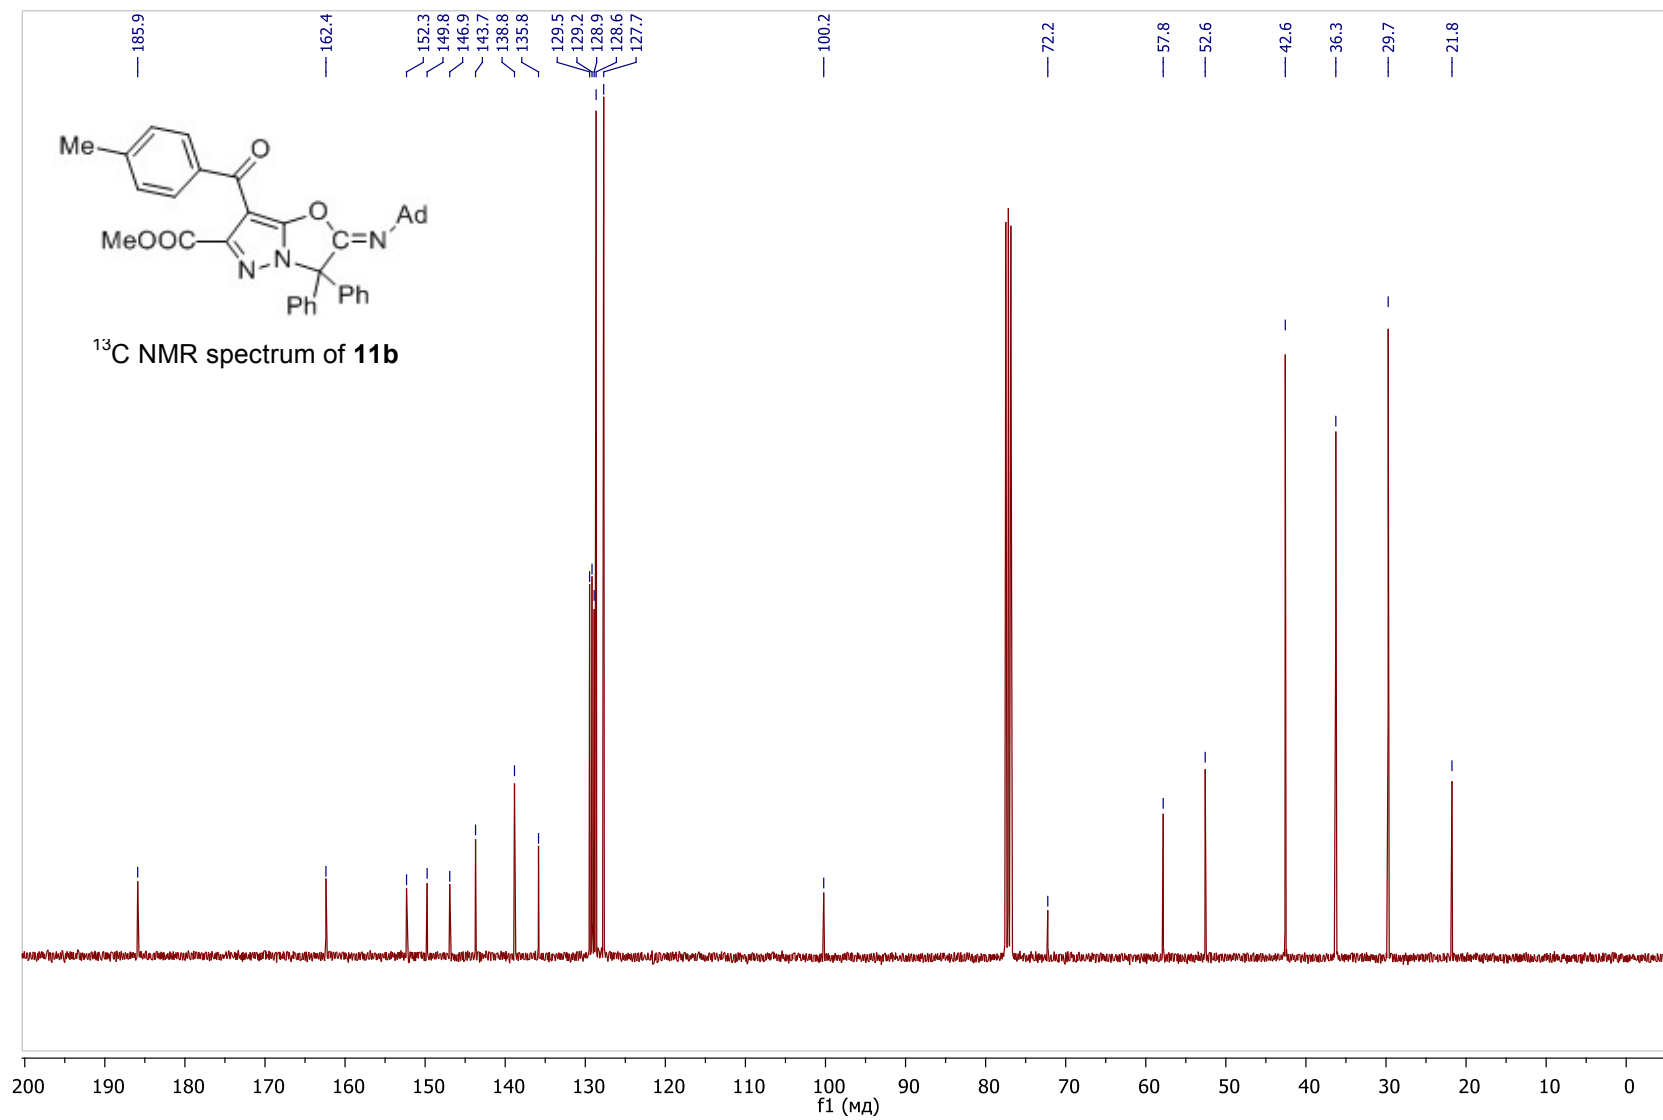

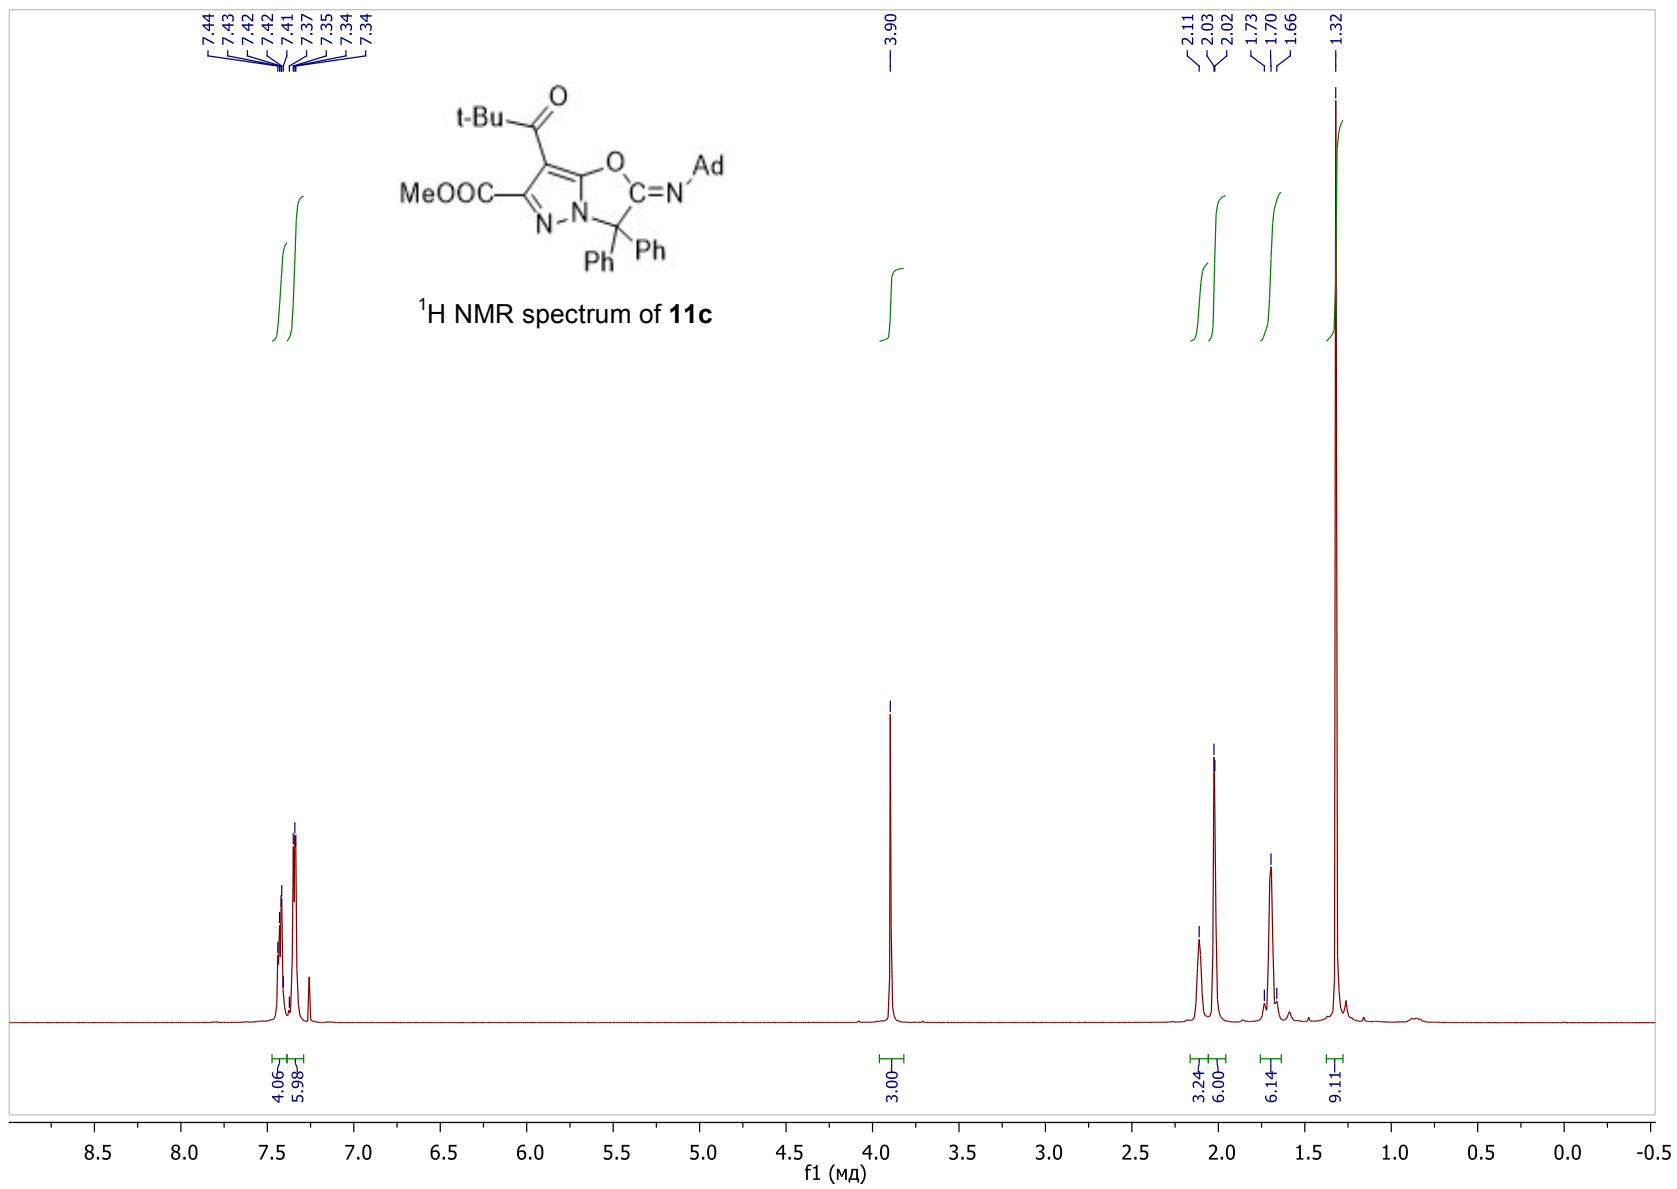

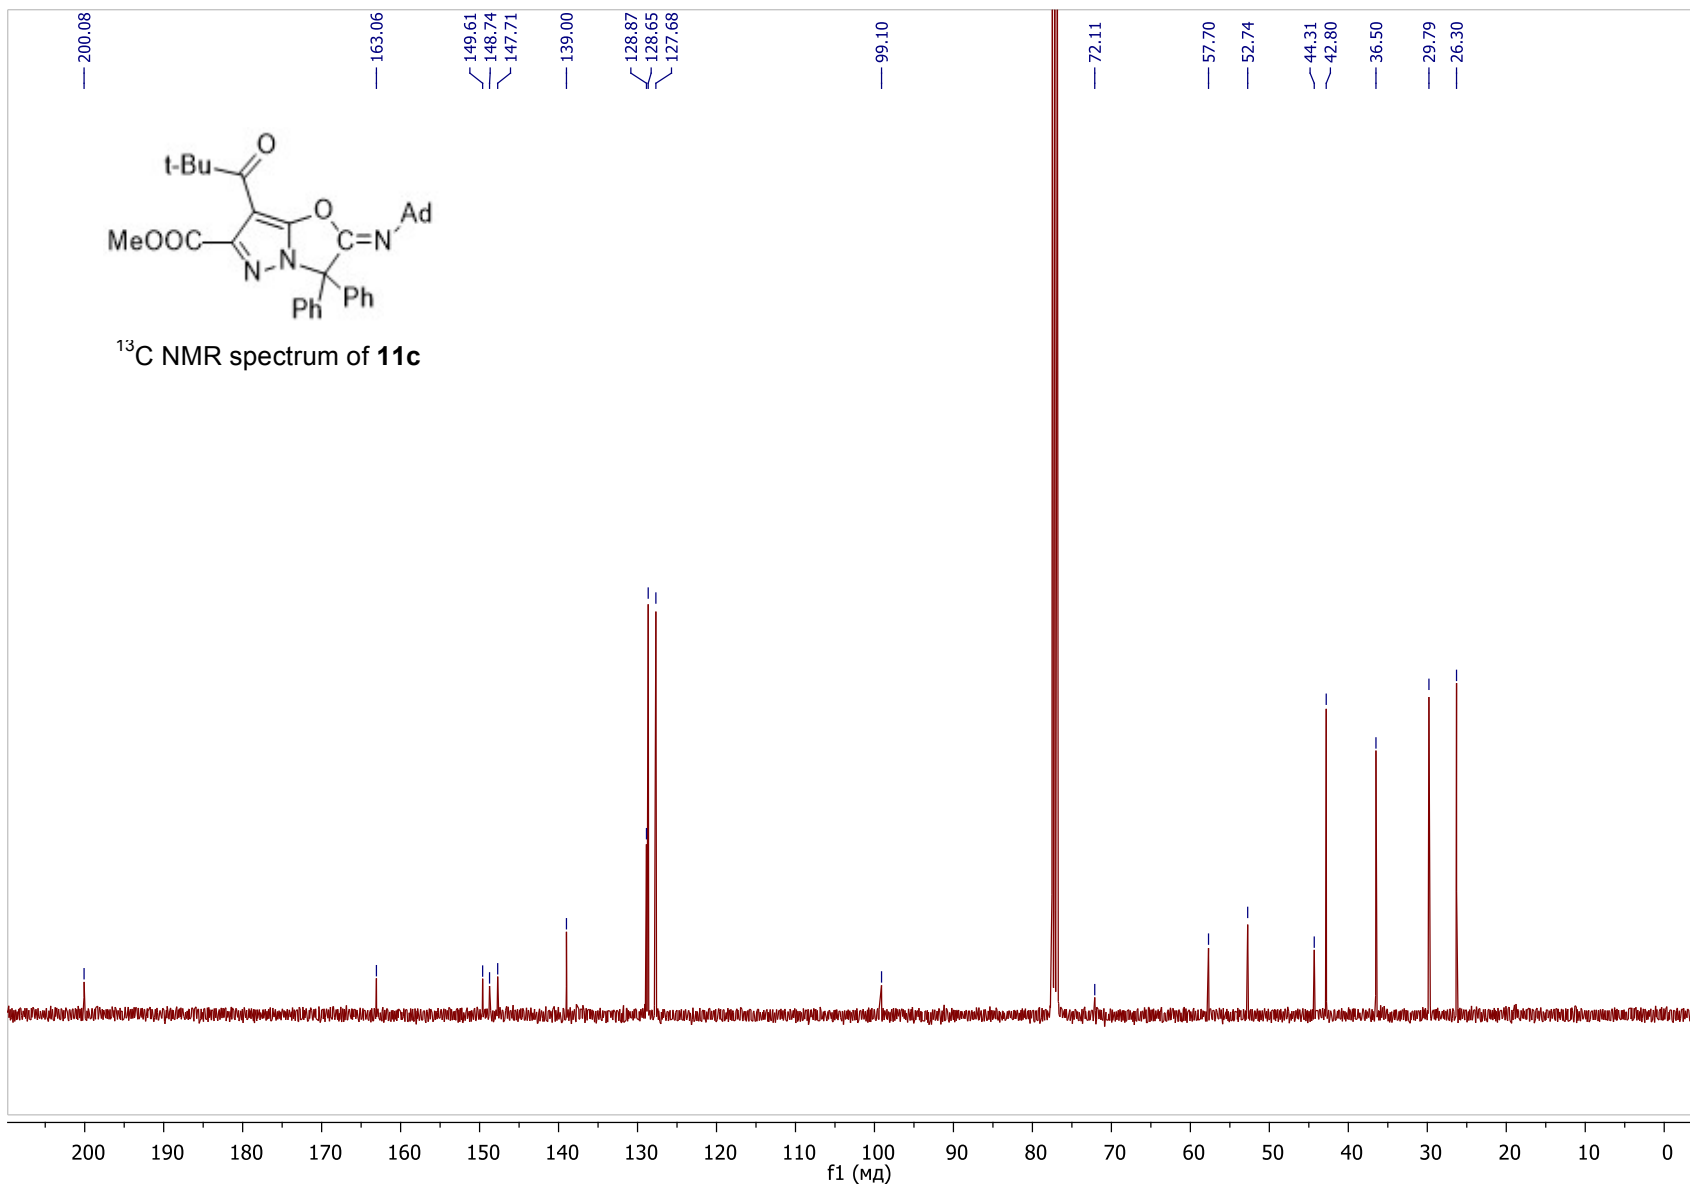

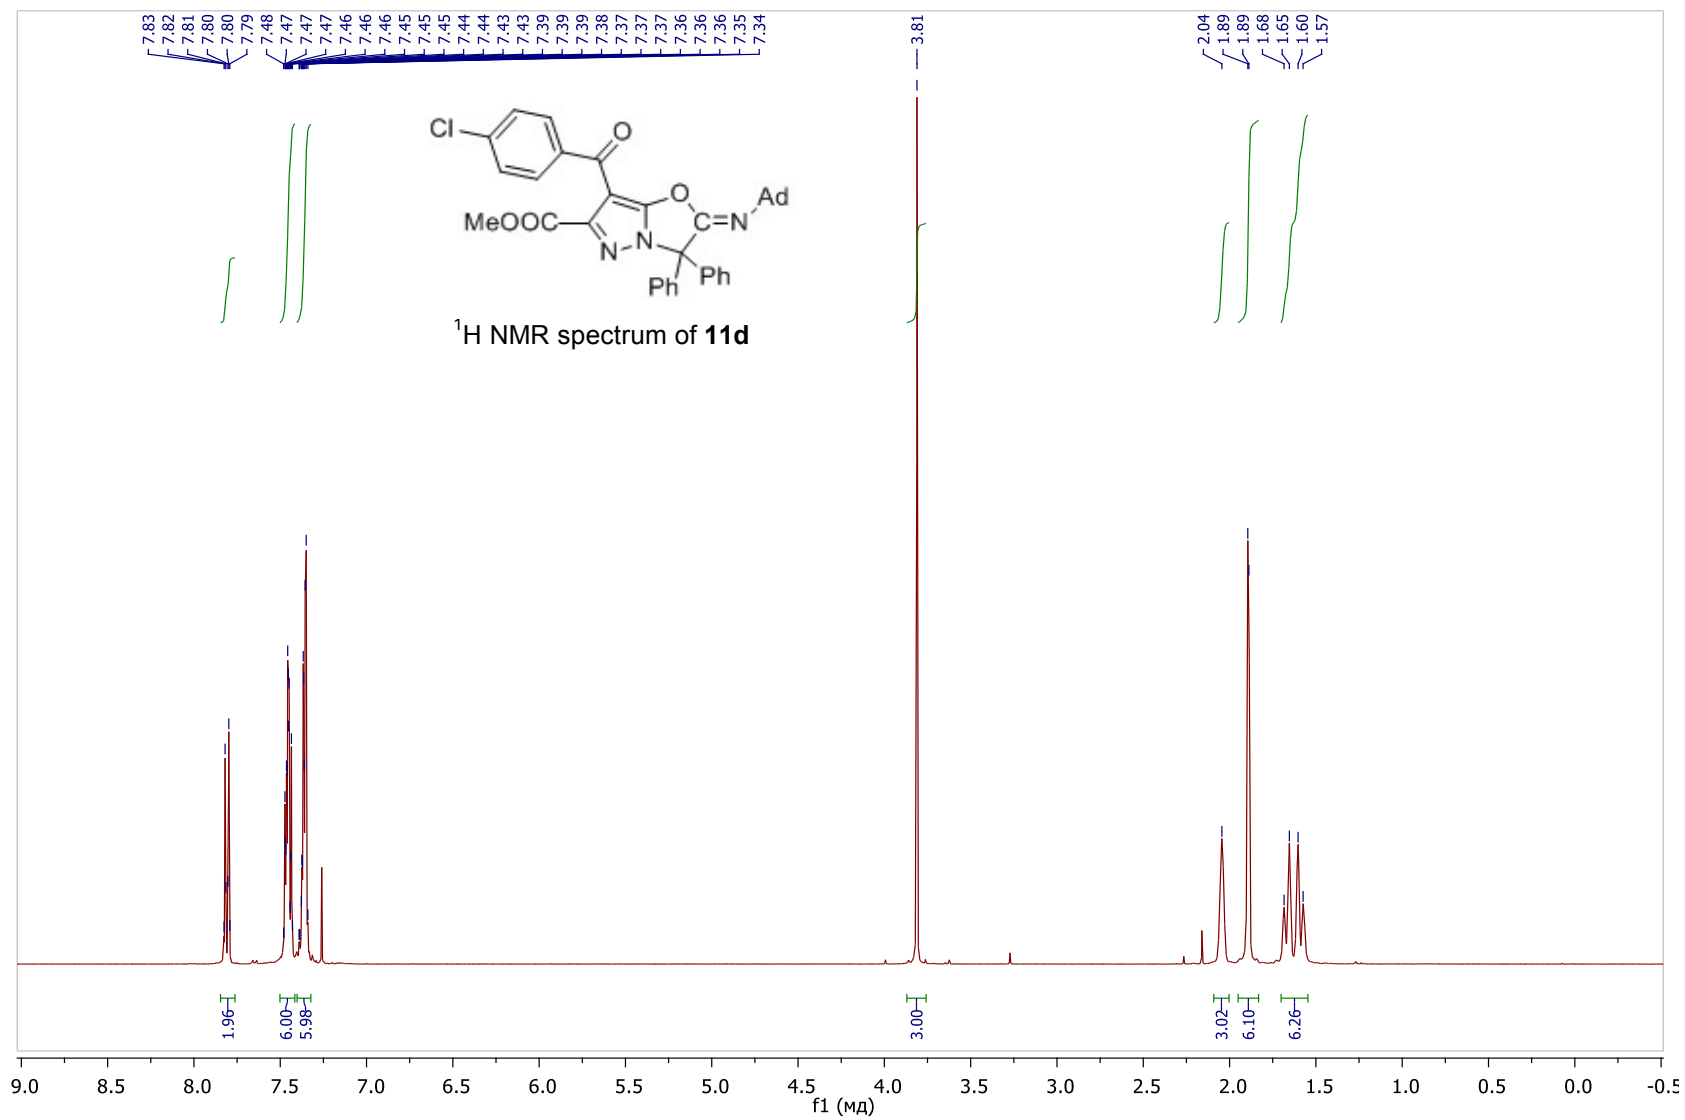



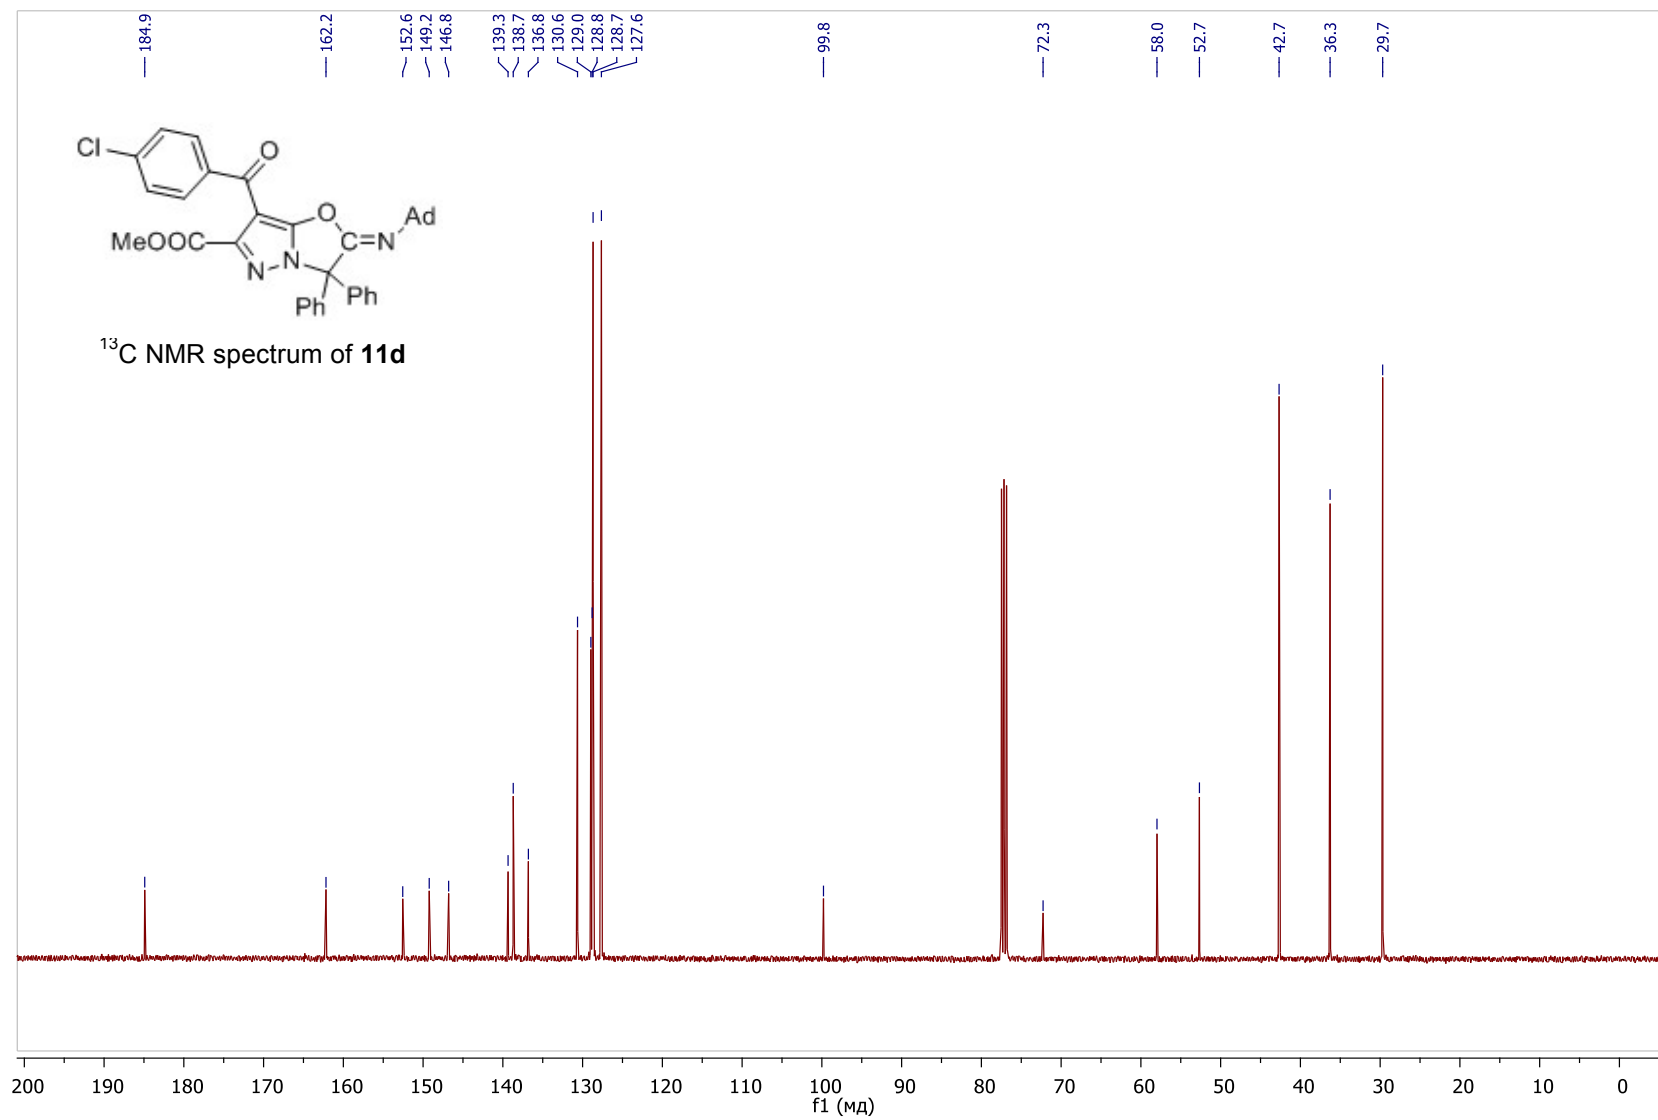

## ORTEP Drawings for X-Ray Crystallography

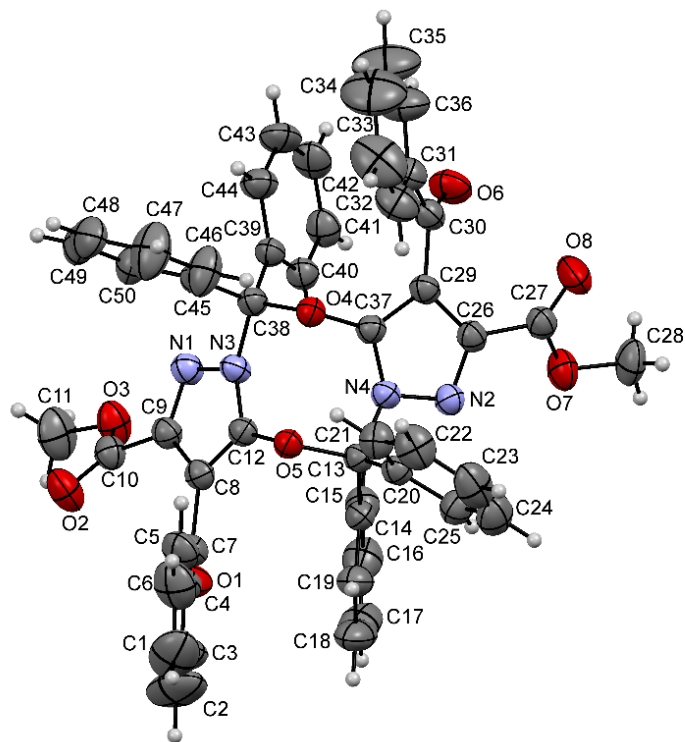

**Figure 1.** ORTEP drawing of **5a** (CCDC 1457141) showing 50% probability amplitude displacement ellipsoids.

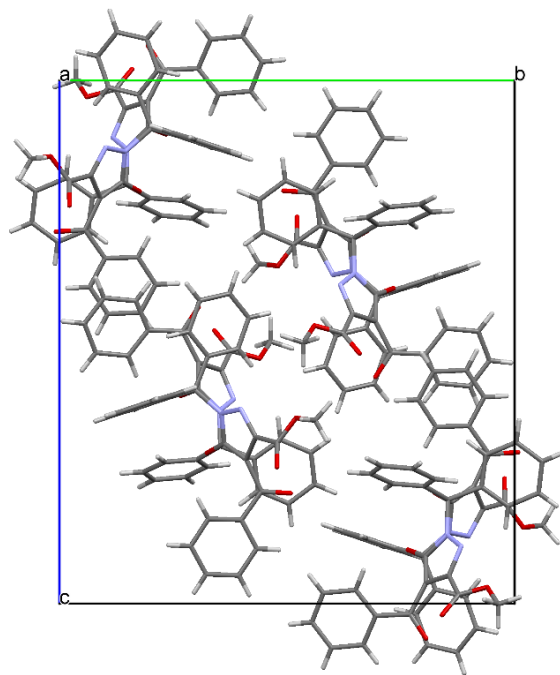

**Figure 2.** Packing of **5a** (CCDC 1457141) in crystalline lattice. View along axis a is shown.

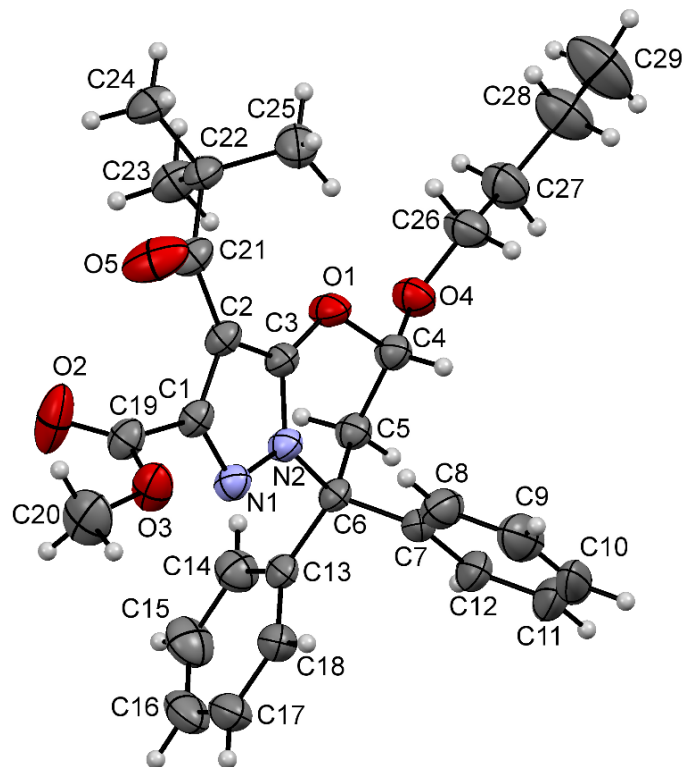

**Figure 3.** ORTEP drawing of **6c** (CCDC 1457144) showing 50% probability amplitude displacement ellipsoids.

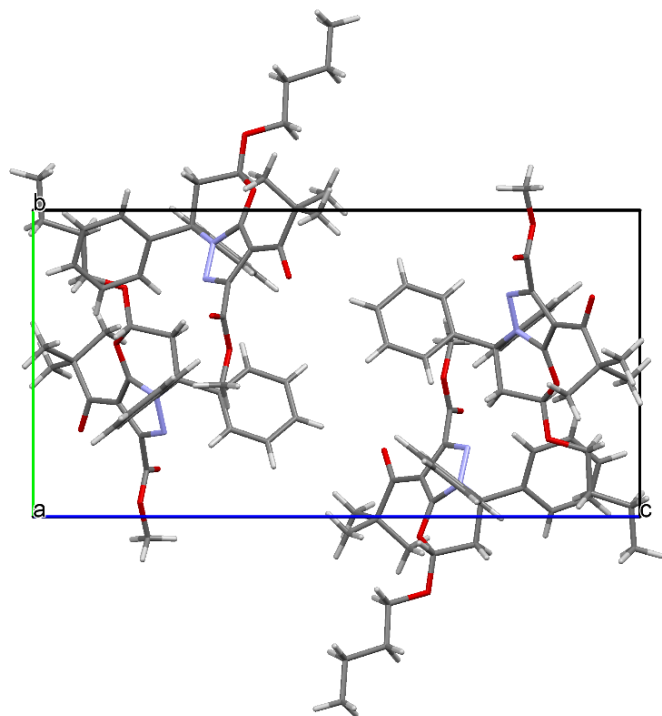

**Figure 4.** Packing of **6c** (CCDC 1457144) in crystalline lattice. View along axis *a* is shown.

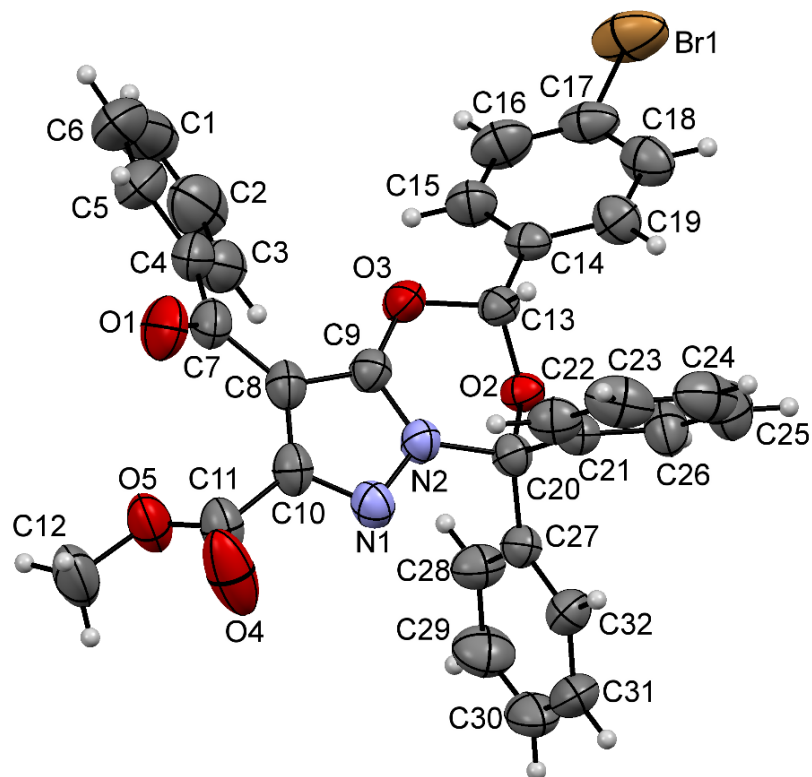

**Figure 5.** ORTEP drawing of **7a** (CCDC 1457142) showing 50% probability amplitude displacement ellipsoids.

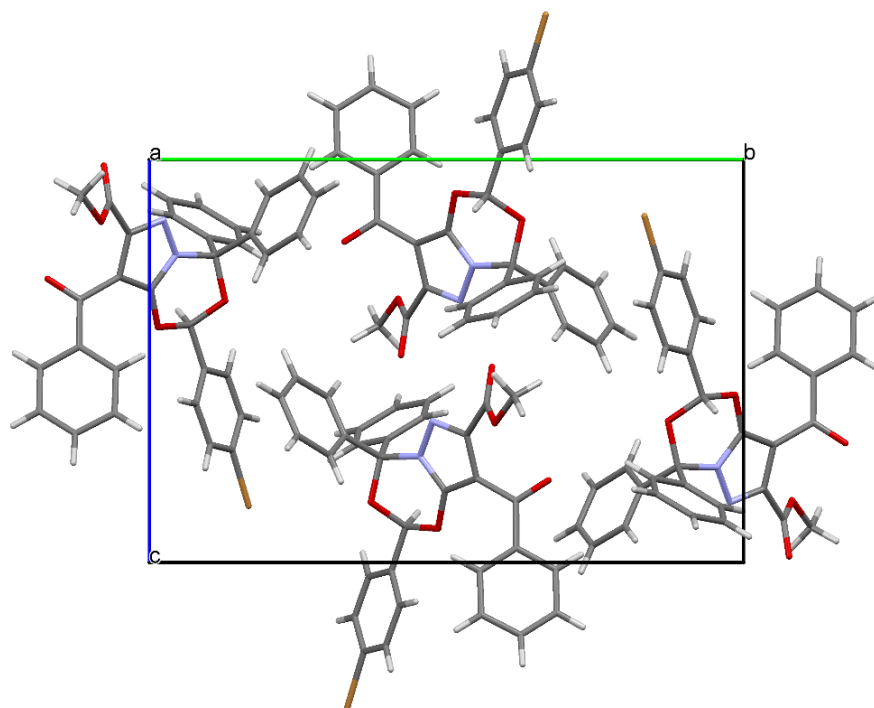

**Figure 6.** Packing of **7a** (CCDC 1457142) in crystalline lattice. View along axis *a* is shown.

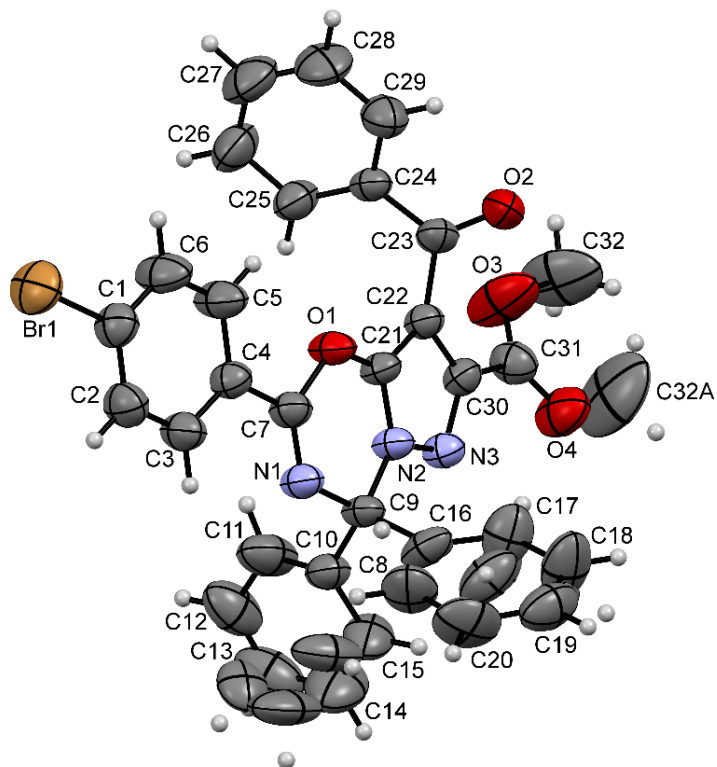

**Figure 7.** ORTEP drawing of **8a** (CCDC 1457143) showing 50% probability amplitude displacement ellipsoids.

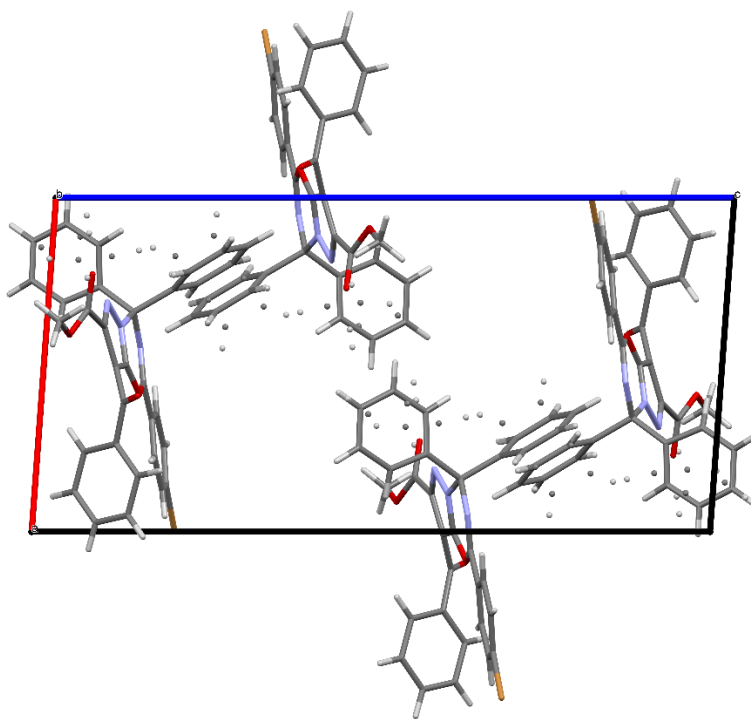

**Figure 8.** Packing of **8a** (CCDC 1457143) in crystalline lattice. View along axis b is shown.

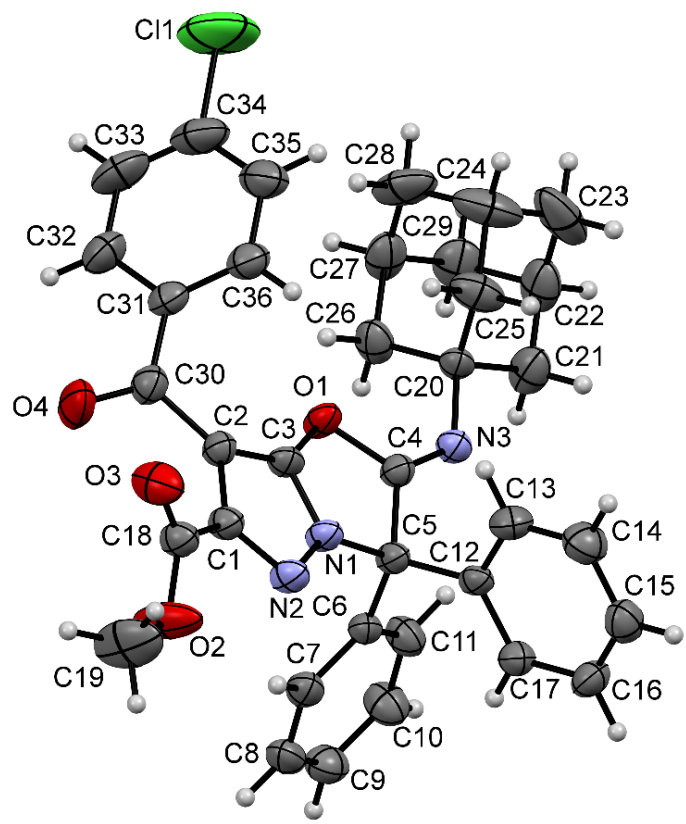

**Figure 9.** ORTEP drawing of **9b** (CCDC 1457145) showing 50% probability amplitude displacement ellipsoids.

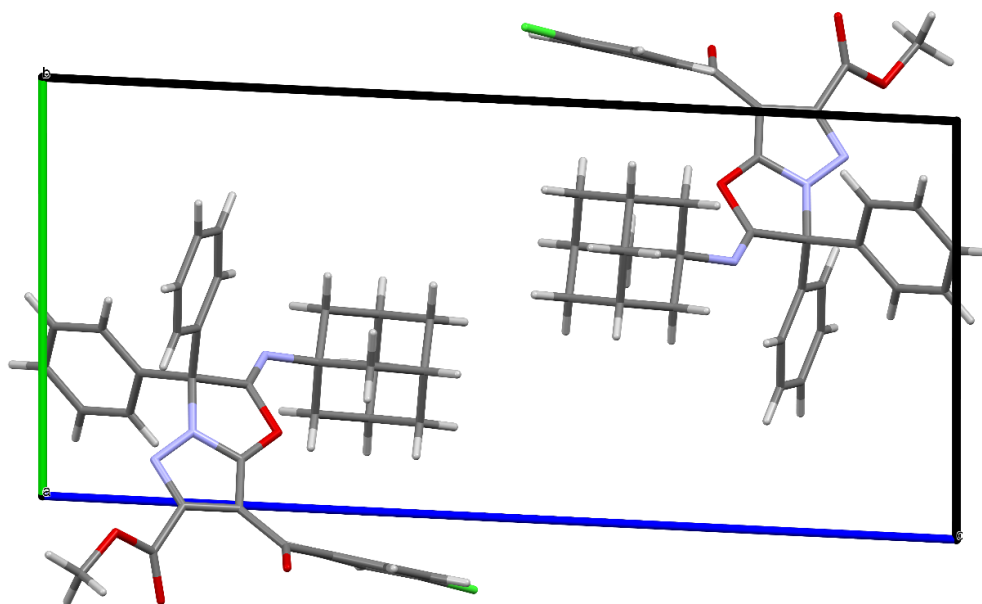

**Figure 10.** Packing of **9b** (CCDC 1457145) in crystalline lattice. View along axis *a* is shown.
